# Supplementary material for: Synthesis and properties of 6-alkynyl-5-aryluracils
Source: publisher site journal article supplement (doi:10.3762/bjoc.20.80), 2024-04-22

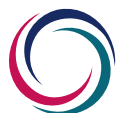

## Supporting Information

for

### Synthesis and properties of 6-alkynyl-5-aryluracils

Ruben Manuel Figueira de Abreu, Till Brockmann, Alexander Villinger, Peter Ehlers  
and Peter Langer

*Beilstein J. Org. Chem.* **2024**, *20*, 898–911. doi:10.3762/bjoc.20.80

### Experimental data and copies of spectra

## Table of contents

|                                                                       |     |
|-----------------------------------------------------------------------|-----|
| Single-crystal X-ray diffraction data .....                           | S1  |
| Optimisation: Synthesis of <b>3a</b> .....                            | S2  |
| Experimental data .....                                               | S3  |
| <sup>1</sup> H, <sup>13</sup> C, and <sup>19</sup> F NMR spectra..... | S14 |

## Single-crystal X-ray diffraction data

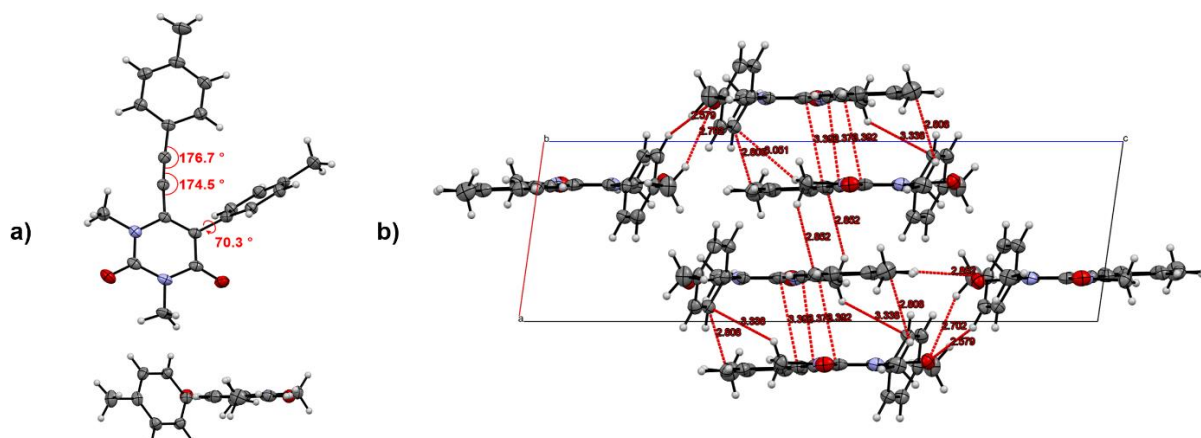

**Figure 1:** ORTEP diagram of **5a** - front view (top) and side view (bottom) (a). Interactions of the molecules within and between a layer with two molecules at the top and the bottom of the unit cell (b). Determined from X-ray structural analysis at 123 K. Element colour: carbon (grey), hydrogen (white), oxygen (red) and nitrogen (blue). The thermal ellipsoids are drawn at the 50 % probability level.

| <b>5a</b>                           |                                                               |
|-------------------------------------|---------------------------------------------------------------|
| Chem. Formula                       | C <sub>22</sub> H <sub>20</sub> N <sub>2</sub> O <sub>2</sub> |
| Form. Weight [g mol <sup>-1</sup> ] | 344.40                                                        |
| Cryst. system                       | monoclinic                                                    |
| Cryt. descript                      | block                                                         |
| Space group                         | P 21/c                                                        |
| (Hall group)                        | -P 2ybc                                                       |
| Color                               | colourless                                                    |
| a [Å]                               | 6.7559(3)                                                     |
| b [Å]                               | 12.3613(5)                                                    |
| c [Å]                               | 21.5403(10)                                                   |
| α [°]                               | 90                                                            |
| β [°]                               | 98.074                                                        |
| γ [°]                               | 90                                                            |
| V [Å <sup>3</sup> ]                 | 1781.04(14)                                                   |
| Z                                   | 4                                                             |
| N <sub>ref</sub>                    | 4292                                                          |
| θ [°]                               | 28.000                                                        |
| h, k, l <sub>max</sub>              | 8, 16, 28                                                     |
| Dx [g cm <sup>-3</sup> ]            | 1.284                                                         |
| μ [mm <sup>-1</sup> ]               | 0.083                                                         |
| λ <sub>MoKα</sub> [Å]               | 0.71073                                                       |
| T [K]                               | 123                                                           |
| F(000)                              | 728.0                                                         |
| Npar                                | 240                                                           |
| R                                   | 0.0470(3634)                                                  |
| wR                                  | 0.1406(4292)                                                  |
| S                                   | 1.080                                                         |

**Table S1:** Synthesis of **3a**

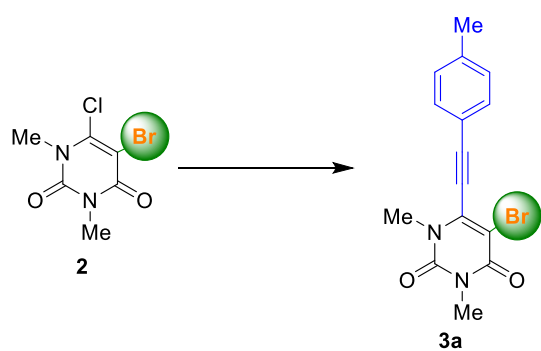

| Entry     | alkyne<br>[equiv.] | Cat.<br>[mol%]                           | Additive<br>[mol%] | Base<br>[equiv.]                   | Solvent | Temp<br>(°C) | Time<br>(h) | Yield |
|-----------|--------------------|------------------------------------------|--------------------|------------------------------------|---------|--------------|-------------|-------|
| 1         | 1.5                | Pd(PPh <sub>3</sub> ) <sub>4</sub> [5]   | /                  | K <sub>3</sub> PO <sub>4</sub> [3] | Toluene | 100          | 15          | /     |
| 2         | 1.5                | Pd(PPh <sub>3</sub> ) <sub>4</sub> [5]   | /                  | K <sub>3</sub> PO <sub>4</sub> [3] | Toluene | <b>80</b>    | 15          | 21    |
| 4         | 1.5                | <b>PdCl<sub>2</sub>(dppf)</b> [5]        | /                  | K <sub>3</sub> PO <sub>4</sub> [3] | Toluene | 80           | 15          | 17    |
| 5         | 1.5                | <b>Pd(OAc)<sub>2</sub></b> [5]           | /                  | K <sub>3</sub> PO <sub>4</sub> [3] | Toluene | 80           | 15          | 24    |
| <b>6*</b> | 1.5                | Pd(PPh <sub>3</sub> ) <sub>4</sub> [5]   | <b>SPhos [10]</b>  | K <sub>3</sub> PO <sub>4</sub> [3] | Toluene | 80           | 15          | 37    |
| 7         | 1.5                | Pd(PPh <sub>3</sub> ) <sub>4</sub> [5]   | <b>Xphos [10]</b>  | K <sub>3</sub> PO <sub>4</sub> [3] | Toluene | 80           | 15          | 29    |
| 8         | 1.5                | Pd(PPh <sub>3</sub> ) <sub>4</sub> [5]   | <b>RuPhos [10]</b> | K <sub>3</sub> PO <sub>4</sub> [3] | Toluene | 80           | 15          | 14    |
| 9         | 1.2                | Pd(PPh <sub>3</sub> )Cl <sub>2</sub> [5] | CuI [5]            | NEt <sub>3</sub> [10]              | DMSO    | 100          | 15          | 25    |
| 10        | 1.2                | Pd(PPh <sub>3</sub> )Cl <sub>2</sub> [5] | CuI [5]            | NEt <sub>3</sub> [10]              | DMSO    | <b>25</b>    | 15          | 99    |
| 11        | 1.2                | Pd(PPh <sub>3</sub> )Cl <sub>2</sub> [5] | CuI [5]            | NEt <sub>3</sub> [10]              | DMSO    | 25           | <b>6</b>    | 99    |



## Experimental data

**5-Bromo-6-chloro-1,3-dimethyluracil (2).** The compound **2** was obtained as a white solid in 52% yield (3.01 g, 11.9 mmol,  $R_f$  = 0.21 heptane/ethyl acetate, 3: 2).  $^1\text{H}$  NMR (300 MHz, DMSO- $d_6$ )  $\delta$  = 3.52 (s, 3H), 3.22 (s, 3H).  $^{13}\text{C}$   $\{^1\text{H}\}$  NMR (75 MHz, DMSO- $d_6$ )  $\delta$  = 157.7, 149.9, 145.6, 96.6, 35.4, 29.3. HRMS (ESI-TOF): calcd. for  $\text{C}_6\text{H}_7\text{BrClN}_2\text{O}_2$   $[\text{M}+\text{H}]^+$  252.9379, found: 252.9385.

**5-Bromo-1,3-dimethyl-6-[2-(4-methylphenyl)ethynyl]uracil (3a).** According to general procedure A, compound **3a** was obtained as a brown solid in 99% yield (681 mg, 2.04 mmol,  $R_f$  = 0.24 heptane/ethyl acetate, 3: 2); mp: 182 – 184 °C. IR (ATR):  $\tilde{\nu}$  [ $\text{cm}^{-1}$ ] = 2213 (m), 1693 (s), 1642 (vs), 1570 (s), 1489 (m), 1432 (s), 1362 (s), 1182 (m), 1009 (s), 822 (s), 745 (s).  $^1\text{H}$  NMR (300 MHz, Chloroform- $d$ )  $\delta$  = 7.55 – 7.45 (m, 2H), 7.28 – 7.19 (m, 2H), 3.68 (s, 3H), 3.44 (s, 3H), 2.41 (s, 3H).  $^{13}\text{C}$   $\{^1\text{H}\}$  NMR (75 MHz, Chloroform- $d$ )  $\delta$  = 159.0, 151.0, 141.9, 136.4, 132.2, 129.7, 117.2, 107.3, 102.0, 80.5, 35.5, 29.5, 21.9 (signal of two carbons are absent, which may relate to signal overlap). (EI, 70 eV):  $m/z$  (%) = 332 ( $\text{M}^+$ , 92), 249 (9), 247 (9), 197 (1), 168 (40), 167 (16), 156 (100). (ESI-TOF): calcd. for  $\text{C}_{15}\text{H}_{14}\text{BrN}_2\text{O}_2$   $[\text{M}+\text{H}]^+$  333.0239, found: 333.0242.

**5-Bromo-1,3-dimethyl-6-[2-(phenyl)ethynyl]uracil (3b).** According to general procedure A, compound **3b** was obtained as a brown solid in 99% yield (376 mg, 1.18 mmol,  $R_f$  = 0.24 heptane/ethyl acetate, 3: 2); mp: 181 – 183 °C. IR (ATR):  $\tilde{\nu}$  [ $\text{cm}^{-1}$ ] = 2219 (m), 1695 (s), 1646 (vs), 1576 (m), 1425 (s), 1088 (m), 1007 (m), 762 (s), 745 (s), 690 (s).  $^1\text{H}$  NMR (300 MHz, Chloroform- $d$ )  $\delta$  = 7.60 – 7.51 (m, 2H), 7.51 – 7.28 (m, 3H), 3.62 (s, 3H), 3.37 (s, 3H).  $^{13}\text{C}$   $\{^1\text{H}\}$  NMR (75 MHz, Chloroform- $d$ )  $\delta$  = 159.0, 151.1, 136.3, 132.3, 131.1, 129.0, 120.3, 106.7, 102.4, 80.7, 35.6, 29.6 (signal of two carbons are absent, which may relate to signal overlap). (EI, 70 eV):  $m/z$  (%) = 318 ( $\text{M}^+$ , 59), 235 (8), 233 (8), 154 (26), 153 (12). (ESI-TOF): calcd. for  $\text{C}_{14}\text{H}_{12}\text{BrN}_2\text{O}_2$   $[\text{M}+\text{H}]^+$  319.0082, found: 319.0088.

**5-Bromo-1,3-dimethyl-6-[2-(4-fluorophenyl)ethynyl]uracil (3c).** According to general procedure A, compound **3c** was obtained as a brown solid in 84% yield (559 mg, 1.66 mmol,  $R_f$  = 0.20 heptane/ethyl acetate, 3: 2); mp: 127 – 129 °C. IR (ATR):  $\tilde{\nu}$  [ $\text{cm}^{-1}$ ] = 2921 (m), 2851 (m), 1693 (s), 1603 (m), 1460 (vs), 1324 (m), 1240 (vs), 1168 (m), 1032 (m), 853 (s), 811 (vs), 739 (vs).  $^1\text{H}$  NMR (300 MHz, Chloroform- $d$ )  $\delta$  = 7.68 – 7.55 (m, 2H), 7.20 – 7.07 (m, 2H), 3.67 (s, 3H), 3.44 (s, 3H).  $^{19}\text{F}$  NMR (282 MHz, Chloroform- $d$ )  $\delta$  = -105.7.  $^{13}\text{C}$   $\{^1\text{H}\}$  NMR (75 MHz, Chloroform- $d$ )  $\delta$  = 164.23 (d,  $J$  = 254.3 Hz), 159.0, 151.0, 136.1, 134.57 (d,  $J$  = 8.8 Hz), 116.57 (d,  $J$  = 22.4 Hz), 116.5, 105.5, 102.5, 80.6, 35.6, 29.6 (signal of two carbons are

absent, which may relate to signal overlap). (EI, 70 eV):  $m/z$  (%) = 336 ( $M^+$ , 56), 172 (25), 171 (11), 161 (11), 160 (100), 147 (13), 145 (29). (ESI-TOF): calcd. for  $C_{14}H_{11}BrFN_2O_2$  [ $M+H$ ] $^+$  336.9988, found: 336.9993.

**5-Bromo-1,3-dimethyl-6-[2-(4-*tert*-butylphenyl)ethynyl]uracil (3d).** According to general procedure A, compound **3d** was obtained as a brown solid in 81% yield (361 mg, 0.963 mmol,  $R_f$  = 0.21 heptane/ethyl acetate, 3: 2); mp: 145 – 147 °C. IR (ATR):  $\tilde{\nu}$  [ $cm^{-1}$ ] = 2946 (m), 2209 (m), 1704 (s), 1652 (vs), 1574 (s), 1432 (s), 1180 (m), 1007 (m), 838 (m), 748 (s), 560 (s).  $^1H$  NMR (300 MHz, Chloroform- $d$ )  $\delta$  = 7.57 – 7.52 (m, 2H), 7.47 – 7.42 (m, 2H), 3.67 (s, 3H), 3.43 (s, 3H), 1.33 (s, 9H).  $^{13}C$  { $^1H$ } NMR (75 MHz, Chloroform- $d$ )  $\delta$  = 159.0, 154.9, 151.1, 136.4, 132.1, 126.0, 117.2, 107.3, 102.1, 80.4, 35.5, 35.3, 31.2, 29.5 (signal of four carbons are absent, which may relate to signal overlap). (EI, 70 eV):  $m/z$  (%) = 374 ( $M^+$ , 79), 362 (17), 361 (100), 59 (98), 333 (12), 198 (12), 195 (13). (ESI-TOF): calcd. for  $C_{18}H_{20}BrN_2O_2$  [ $M+H$ ] $^+$  375.0708, found: 375.0714.

**5-Bromo-1,3-dimethyl-6-[2-(4-trifluoromethylphenyl)ethynyl]uracil (3e).** According to general procedure A, compound **3e** was obtained as a black solid in 44% yield (302 mg, 0.881 mmol,  $R_f$  = 0.23 heptane/ethyl acetate, 3: 2); mp: 131 – 133 °C. IR (ATR):  $\tilde{\nu}$  [ $cm^{-1}$ ] = 2921 (m), 2202 (m), 1702 (s), 1644 (s), 1574 (vs), 1434 (s), 1250 (vs), 1020 (s), 834 (s), 748 (s).  $^1H$  NMR (300 MHz, Chloroform- $d$ )  $\delta$  7.78 – 7.65 (m, 4H), 3.69 (s, 3H), 3.45 (s, 3H).  $^{19}F$  NMR (282 MHz, Chloroform- $d$ )  $\delta$  = -63.2.  $^{13}C$  { $^1H$ } NMR (75 MHz, Chloroform- $d$ )  $\delta$  = 158.9, 151.0, 135.6, 132.6 (q,  $J$  = 33.1 Hz), 132.6, 125.9 (q,  $J$  = 3.8 Hz), 124.0, 123.6 (q,  $J$  = 272.6 Hz), 104.2, 103.4, 82.3, 35.6, 29.7 (signal of two carbons are absent, which may relate to signal overlap). (EI, 70 eV):  $m/z$  (%) = 386 ( $M^+$ , 40), 222 (14), 211 (12), 210 (100). (ESI-TOF): calcd. for  $C_{15}H_{11}BrF_3N_2O_2$  [ $M+H$ ] $^+$  386.9956, found: 386.9964.

**5-Bromo-1,3-dimethyl-6-[2-(4-methoxyphenyl)ethynyl]uracil (3f).** According to general procedure A, compound **3f** was obtained as a brown solid in 40% yield (280 mg, 0.802 mmol,  $R_f$  = 0.18 heptane/ethyl acetate, 3: 2); mp: 164 – 166 °C. IR (ATR):  $\tilde{\nu}$  [ $cm^{-1}$ ] = 2921 (m), 2202 (m), 1702 (s), 1642 (s), 1574 (vs), 1428 (s), 1250 (vs), 1020 (s), 834 (vs), 748 (vs).  $^1H$  NMR (300 MHz, Chloroform- $d$ )  $\delta$  = 7.61 – 7.50 (m, 2H), 7.01 – 6.88 (m, 2H), 3.86 (s, 3H), 3.67 (s, 3H), 3.43 (s, 3H).  $^{13}C$  { $^1H$ } NMR (75 MHz, Chloroform- $d$ )  $\delta$  = 161.9, 159.1, 151.1, 136.6, 134.2, 114.7, 112.2, 107.7, 101.6, 80.3, 55.6, 35.6, 29.5 (signal of two carbons are absent, which may relate to signal overlap). (EI, 70 eV):  $m/z$  (%) = 348 ( $M^+$ , 98), 265 (9), 263 (9), 212 (22), 184 (44), 172 (59), 169 (21). (ESI-TOF): calcd. for  $C_{15}H_{14}BrN_2O_3$  [ $M+H$ ] $^+$  349.0188, found: 349.0183.

**5-Bromo-1,3-dimethyl-6-[2-(thiophene)ethynyl]uracil (3h).** According to general procedure A, compound **3h** was obtained as a brown solid in 77% yield (249 mg, 0.767 mmol,  $R_f$  = 0.20 heptane/ethyl acetate, 3: 2); mp: 166 – 168 °C. IR (ATR):  $\tilde{\nu}$  [ $\text{cm}^{-1}$ ] = 2213 (m), 1695 (s), 1644 (vs), 1576 (s), 1432 (s), 1009 (s), 785 (s), 745 (vs).  $^1\text{H}$  NMR (300 MHz, Chloroform- $d$ )  $\delta$  = 7.77 (dd,  $J$  = 3.0, 1.2 Hz, 1H), 7.40 (dd,  $J$  = 5.1, 3.0 Hz, 1H), 7.26 (dd,  $J$  = 5.0, 1.2 Hz, 1H), 3.66 (s, 3H), 3.43 (s, 3H).  $^{13}\text{C}$   $\{^1\text{H}\}$  NMR (75 MHz, Chloroform- $d$ )  $\delta$  = 159.0, 151.1, 136.3, 132.8, 129.6, 126.7, 119.5, 102.2, 102.1, 80.6, 35.6, 29.6. (EI, 70 eV):  $m/z$  (%) = 324 ( $\text{M}^+$ , 60), 241 (8), 239 (8), 188 (14), 160 (31), 159 (11), 149 (12). (ESI-TOF): calcd. for  $\text{C}_{12}\text{H}_{10}\text{BrN}_2\text{O}_2\text{S}$   $[\text{M}+\text{H}]^+$  324.9646, found: 324.9652.

**5-Bromo-1,3-dimethyl-6-[2-(4-dimethylamino)ethynyl]uracil (3i).** According to general procedure A, compound **3i** was obtained as a black solid in 62% yield (88.9 mg, 0.245 mmol,  $R_f$  = 0.18 heptane/ethyl acetate, 3: 2); mp: 240 – 242 °C. IR (ATR):  $\tilde{\nu}$  [ $\text{cm}^{-1}$ ] = 2921 (s), 2851 (m), 2198 (m), 1691 (s), 1642 (s), 1547 (vs), 1425 (s), 1355 (s), 1174 (s), 999 (s), 809 (vs), 745 (vs).  $^1\text{H}$  NMR (500 MHz, Chloroform- $d$ )  $\delta$  = 7.48 – 7.41 (m, 2H), 6.67 – 6.61 (m, 2H), 3.65 (s, 3H), 3.40 (s, 3H), 3.04 (s, 6H).  $^{13}\text{C}$   $\{^1\text{H}\}$  NMR (125 MHz, Chloroform- $d$ )  $\delta$  = 159.2, 151.8, 151.2, 137.1, 133.9, 111.7, 110.5, 106.0, 100.0, 80.6, 40.1, 35.5, 29.4 (signal of three carbons are absent, which may relate to signal overlap). (EI, 70 eV):  $m/z$  (%) = 361 ( $\text{M}^+$ , 98), 305 (10), 277 (15), 276 (13), 225 (45), 197 (29), 182 (20). (ESI-TOF): calcd. for  $\text{C}_{16}\text{H}_{17}\text{BrN}_3\text{O}_2$   $[\text{M}+\text{H}]^+$  362.0504, found: 362.0508.

**5-Bromo-1,3-dimethyl-6-[2-(biphenyl)ethynyl]uracil (3j).** According to general procedure A, compound **3j** was obtained as a brown solid in 58% yield (226 mg, 0.572 mmol,  $R_f$  = 0.23 heptane/ethyl acetate, 3: 2); mp: 195 – 197 °C. IR (ATR):  $\tilde{\nu}$  [ $\text{cm}^{-1}$ ] = 2924 (m), 2217 (m), 1702 (s), 1650 (vs), 1576 (vs), 1428 (s), 1186 (m), 762 (vs), 743 (vs).  $^1\text{H}$  NMR (300 MHz, Chloroform- $d$ )  $\delta$  = 7.67 (d,  $J$  = 0.8 Hz, 4H), 7.64 – 7.58 (m, 2H), 7.51 – 7.37 (m, 3H), 3.69 (s, 3H), 3.43 (s, 3H).  $^{13}\text{C}$   $\{^1\text{H}\}$  NMR (75 MHz, Chloroform- $d$ )  $\delta$  = 159.0, 151.0, 143.9, 139.7, 136.3, 132.8, 129.2, 128.4, 127.5, 127.2, 118.9, 106.7, 102.3, 81.4, 35.6, 29.6 (signal of four carbons are absent, which may relate to signal overlap). (EI, 70 eV):  $m/z$  (%) = 394 ( $\text{M}^+$ , 100), 309 (8), 258 (14), 230 (40), 229 (11), 219 (12), 218 (64), 214 (20). (ESI-TOF): calcd. for  $\text{C}_{20}\text{H}_{16}\text{BrN}_2\text{O}_2$   $[\text{M}+\text{H}]^+$  395.0395, found: 395.0401.

**1,3-Dimethyl-5,6-[2-(4-methylphenyl)ethynyl]uracil (4a).** According to general procedure B, compound **4a** was obtained as a brown solid in 92% yield (137 mg, 0.368 mmol,  $R_f$  = 0.35 heptane/ethyl acetate, 3: 2); mp: 122 – 124 °C. IR (ATR):  $\tilde{\nu}$  [ $\text{cm}^{-1}$ ] = 2921 (m), 1697 (s), 1646 (vs), 1446 (s), 1368 (s), 1174 (m), 1040 (m), 811 (s), 748 (s).  $^1\text{H}$  NMR (300 MHz, Chloroform- $d$ )  $\delta$  = 7.50 – 7.41 (m, 4H), 7.24 – 7.18 (m, 2H), 7.16 – 7.10 (m, 2H), 3.67 (s, 3H), 3.41 (s,

3H), 2.40 (s, 3H), 2.36 (s, 3H).  $^{13}\text{C}$   $\{^1\text{H}\}$  NMR (75 MHz, Chloroform-*d*)  $\delta$  = 161.1, 151.0, 141.6, 138.8, 138.6, 132.2, 131.6, 129.7, 129.2, 120.2, 117.6, 107.2, 103.6, 97.7, 81.9, 80.4, 35.0, 28.7, 21.9, 21.7 (signal of four carbons are absent, which may relate to signal overlap). (EI, 70 eV):  $m/z$  (%) = 368 ( $\text{M}^+$ , 100), 226 (11), 255 (50), 223 (22), 197 (19), 157 (12), 156 (95). (EI): calcd. for  $\text{C}_{24}\text{H}_{20}\text{N}_2\text{O}_2$  [ $\text{M}$ ] $^+$  368.15193, found: 368.15202.

**1,3-Dimethyl-5,6-[2-(4-*tert*-butylphenyl)ethynyl]uracil (4b).** According to general procedure B, compound **4b** was obtained as a brown solid in 47% yield (85 mg, 0.188 mmol,  $R_f$  = 0.46 heptane/ethyl acetate, 3: 2); mp: 167 – 169 °C. IR (ATR):  $\tilde{\nu}$  [ $\text{cm}^{-1}$ ] = 2957 (m), 1704 (s), 1652 (vs), 1448 (s), 1268 (m), 830 (s), 748 (s).  $^1\text{H}$  NMR (500 MHz, Chloroform-*d*)  $\delta$  = 7.55 – 7.51 (m, 2H), 7.51 – 7.47 (m, 2H), 7.44 – 7.41 (m, 2H), 7.37 – 7.33 (m, 2H), 3.68 (s, 3H), 3.41 (s, 3H), 1.34 (s, 9H), 1.32 (s, 9H).  $^{13}\text{C}$   $\{^1\text{H}\}$  NMR (126 MHz, Chloroform-*d*)  $\delta$  = 161.1, 154.6, 151.9, 151.0, 138.5, 132.1, 131.5, 126.0, 125.4, 120.3, 117.6, 107.2, 103.6, 97.8, 81.9, 80.4, 35.3, 35.0, 31.3, 31.2, 28.7 (signal of nine carbons are absent, which may relate to signal overlap). (EI, 70 eV):  $m/z$  (%) = 452 ( $\text{M}^+$ , 100), 438 (48), 43 (96), 296 (8), 211 (28), 198 (53), 183 (19). (EI): calcd. for  $\text{C}_{30}\text{H}_{32}\text{N}_2\text{O}_2$  [ $\text{M}$ ] $^+$  452.24583, found: 452.24610.

**1,3-Dimethyl-5,6-[2-(phenyl)ethynyl]uracil (4c).** According to general procedure B, compound **4c** was obtained as a brown solid in 72% yield (98 mg, 0.288 mmol,  $R_f$  = 0.30 heptane/ethyl acetate, 3: 2); mp: 91 – 93 °C. IR (ATR):  $\tilde{\nu}$  [ $\text{cm}^{-1}$ ] = 2921 (m), 2202 (m), 1702 (s), 1650 (vs), 1442 (s), 1327 (s), 1044 (m), 758 (vs), 686 (vs).  $^1\text{H}$  NMR (500 MHz, Chloroform-*d*)  $\delta$  = 7.61 – 7.58 (m, 2H), 7.57 – 7.52 (m, 2H), 7.50 – 7.46 (m, 1H), 7.43 – 7.39 (m, 2H), 7.35 – 7.31 (m, 3H), 3.69 (s, 3H), 3.43 (s, 3H).  $^{13}\text{C}$   $\{^1\text{H}\}$  NMR (126 MHz, Chloroform-*d*)  $\delta$  = 161.0, 150.9, 138.6, 132.3, 131.7, 130.9, 129.0, 128.7, 128.5, 123.2, 120.6, 106.7, 103.7, 97.6, 82.4, 80.7, 35.0, 28.8 (signal of four carbons are absent, which may relate to signal overlap). (EI, 70 eV):  $m/z$  (%) = 340 ( $\text{M}^+$ , 100), 266 (11), 207 (11), 169 (8), 149 (14), 143 (12), 142 (91). (EI): calcd. for  $\text{C}_{22}\text{H}_{16}\text{N}_2\text{O}_2$  [ $\text{M}$ ] $^+$  340.12063, found: 340.12119.

**1,3-Dimethyl-5,6-[2-(4-methoxyphenyl)ethynyl]uracil (4d).** According to general procedure B, compound **4d** was obtained as a brown solid in 37% yield (59 mg, 0.147 mmol,  $R_f$  = 0.21 heptane/ethyl acetate, 3: 2); mp: 110 – 112 °C. IR (ATR):  $\tilde{\nu}$  [ $\text{cm}^{-1}$ ] = 2926 (m), 2192 (m), 1697 (s), 1650 (vs), 1560 (s), 1434 (s), 1246 (vs), 1017 (s), 828 (s).  $^1\text{H}$  NMR (500 MHz, Chloroform-*d*)  $\delta$  = 7.53 – 7.50 (m, 2H), 7.50 – 7.47 (m, 2H), 6.92 – 6.89 (m, 2H), 6.88 – 6.84 (m, 2H), 3.85 (s, 3H), 3.83 (s, 3H), 3.66 (s, 3H), 3.41 (s, 3H).  $^{13}\text{C}$   $\{^1\text{H}\}$  NMR (126 MHz, Chloroform-*d*)  $\delta$  = 161.7, 161.1, 160.0, 151.0, 138.5, 134.0, 133.2, 115.5, 114.7, 114.1, 112.6, 107.4, 103.3, 97.4, 81.3, 80.3, 55.6, 55.5, 35.0, 28.7 (signal of four carbons are absent, which may relate to signal overlap). (EI, 70 eV):  $m/z$  (%) = 400 ( $\text{M}^+$ , 100), 385 (15), 200 (13),

173 (13), 172 (96), 159 (11), 157 (30). (EI): calcd. for  $C_{24}H_{20}N_2O_4$   $[M]^+$  400.14176, found: 400.14230.

**1,3-Dimethyl-5,6-[2-(4-dimethylaminophenyl)ethynyl]uracil (4e).** According to general procedure B, compound **4e** was obtained as a brown solid in 86% yield (147 mg, 0.345 mmol,  $R_f$  = 0.17 heptane/ethyl acetate, 3: 2); mp: 157 – 159 °C. IR (ATR):  $\tilde{\nu}$  [ $cm^{-1}$ ] = 2917 (m), 2173 (s), 1697 (s), 1601 (vs), 1518 (vs), 1360 (vs), 1170 (vs), 809 (vs).  $^1H$  NMR (250 MHz, Chloroform-*d*)  $\delta$  = 7.48 – 7.41 (m, 4H), 6.66 – 6.61 (m, 4H), 3.65 (s, 3H), 3.39 (s, 3H), 3.03 (s, 6H), 2.99 (s, 6H).  $^{13}C$   $\{^1H\}$  NMR (63 MHz, Chloroform-*d*)  $\delta$  = 161.4, 151.6, 151.1, 150.2, 138.2, 133.8, 132.8, 111.9, 111.7, 110.4, 109.8, 106.7, 102.5, 98.4, 80.9, 80.7, 40.3, 40.1, 34.8, 28.6 (signal of six carbons are absent, which may relate to signal overlap). (EI, 70 eV):  $m/z$  (%) = 426 ( $M^+$ , 100), 262 (14), 185 (23), 183 (14), 17 (16), 169 (10). (EI): calcd. for  $C_{26}H_{26}N_4O_2$   $[M]^+$  426.20503, found: 426.20633.

**1,3-Dimethyl-5-[2-(4-fluorophenyl)ethynyl]-6-[2-(4-methylphenyl)-ethynyl]uracil (4h).** According to general procedure C, compound **4h** was obtained as a brown solid in 47% yield (70 mg, 0.188 mmol,  $R_f$  = 0.35 heptane/ethyl acetate, 3: 2); mp: 173 – 175 °C. IR (ATR):  $\tilde{\nu}$  [ $cm^{-1}$ ] = 2200 (m), 1702 (s), 1648 (vs), 1446 (s), 1331 (s), 1090 (s), 828 (vs), 745 (s).  $^1H$  NMR (500 MHz, Chloroform-*d*)  $\delta$  = 7.54 – 7.49 (m, 2H), 7.48 – 7.44 (m, 2H), 7.23 – 7.19 (m, 2H), 7.05 – 6.99 (m, 2H), 3.67 (s, 3H), 3.41 (s, 3H), 2.41 (s, 3H).  $^{19}F$  NMR (282 MHz, Chloroform-*d*)  $\delta$  = -110.4.  $^{13}C$   $\{^1H\}$  NMR (126 MHz, Chloroform-*d*)  $\delta$  = 162.8 (d,  $J$  = 250.0 Hz), 161.0, 150.9, 141.8, 138.9, 133.6 (d,  $J$  = 8.6 Hz), 129.8, 119.4, 119.4, 117.5, 115.8 (d,  $J$  = 22.2 Hz), 107.4, 103.2, 96.3, 82.3 (d,  $J$  = 1.7 Hz), 80.3, 35.0, 28.8, 21.9 (signal of four carbons are absent, which may relate to signal overlap). (EI, 70 eV):  $m/z$  (%) = 372 ( $M^+$ , 100), 287 (11), 272 (7), 258 (11), 157 (20), 156 (89). (EI): calcd. for  $C_{23}H_{17}FN_2O_2$   $[M]^+$  372.12686, found: 372.12648.

**1,3-Dimethyl-5-(4-methylphenyl)-6-[2-(4-methylphenyl)ethynyl]uracil (5a).** According to general procedure D, compound **5a** was obtained as a brown solid in 62% yield (65 mg, 0.189 mmol,  $R_f$  = 0.22 heptane/ethyl acetate, 3: 2); mp: 191 – 193 °C. IR (ATR):  $\tilde{\nu}$  [ $cm^{-1}$ ] = 1685 (s), 1640 (vs), 1508 (s), 1452 (s), 1127 (m), 1022 (m), 820 (s), 748 (s).  $^1H$  NMR (300 MHz, Chloroform-*d*)  $\delta$  = 7.42 – 7.35 (m, 2H), 7.25 – 7.19 (m, 2H), 7.14 (s, 3H), 3.69 (s, 3H), 3.43 (s, 3H), 2.40 (s, 3H), 2.36 (s, 3H).  $^{13}C$   $\{^1H\}$  NMR (75 MHz, Chloroform-*d*)  $\delta$  = 162.2, 151.7, 141.0, 138.0, 134.1, 131.8, 130.8, 130.2, 129.5, 128.7, 118.6, 117.7, 104.5, 80.8, 34.6, 28.6, 21.8, 21.5 (signal of four carbons are absent, which may relate to signal overlap). (EI, 70 eV):  $m/z$  (%) = 344 ( $M^+$ , 100), 329 (53), 286 (26), 258 (47), 244 (40), 229 (16), 215 (13). (ESI-TOF): calcd. for  $C_{22}H_{21}N_2O_2$   $[M+H]^+$  345.1603, found: 345.1604.

**1,3-Dimethyl-5-(4-dimethylaminophenyl)-6-[2-phenylethynyl]uracil (5b).** According to general procedure D, compound **5b** was obtained as a brown solid in 52% yield (176 mg, 0.491 mmol,  $R_f$  = 0.14 heptane/ethyl acetate, 3: 2); mp: 105 – 107 °C. IR (ATR):  $\tilde{\nu}$  [ $\text{cm}^{-1}$ ] = 3329 (m), 1693 (s), 1638 (vs), 1611 (vs), 1514 (s), 1442 (s), 1357 (s), 813 (s), 748 (s).  $^1\text{H}$  NMR (500 MHz, Chloroform- $d$ )  $\delta$  = 7.44 – 7.40 (m, 2H), 7.40 – 7.36 (m, 1H), 7.35 – 7.30 (m, 4H), 6.79 – 6.75 (m, 2H), 3.70 (s, 3H), 3.43 (s, 3H), 2.99 (s, 6H).  $^{13}\text{C}$   $\{^1\text{H}\}$  NMR (126 MHz, Chloroform- $d$ )  $\delta$  = 162.5, 151.7, 150.5, 132.8, 131.9, 131.7, 130.2, 128.7, 121.0, 120.6, 119.2, 111.8, 103.4, 81.7, 40.7, 34.5, 28.6 (signal of five carbons are absent, which may relate to signal overlap). (EI, 70 eV):  $m/z$  (%) = 359 ( $\text{M}^+$ , 100), 301 (7), 273 (16), 259 (14), 180 (12). (ESI-TOF): calcd. for  $\text{C}_{22}\text{H}_{22}\text{N}_3\text{O}_2$  [ $\text{M}+\text{H}$ ] $^+$  360.1712, found: 360.1717.

**1,3-Dimethyl-5-(4-trifluoromethylphenyl)-6-[2-phenylethynyl]uracil (5c).** According to general procedure D, compound **5c** was obtained as a brown solid in 40% yield (145 mg, 0.378 mmol,  $R_f$  = 0.19 heptane/ethyl acetate, 3: 2); mp: 136 – 139 °C. IR (ATR):  $\tilde{\nu}$  [ $\text{cm}^{-1}$ ] = 1702 (s), 1640 (vs), 1615 (s), 1436 (s), 1314 (s), 1120 (vs), 1065 (s), 748 (s).  $^1\text{H}$  NMR (500 MHz, Chloroform- $d$ )  $\delta$  = 7.72 – 7.67 (m, 2H), 7.66 – 7.62 (m, 2H), 7.44 – 7.39 (m, 1H), 7.36 – 7.31 (m, 2H), 7.22 – 7.19 (m, 2H), 3.72 (s, 3H), 3.45 (s, 3H).  $^{19}\text{F}$  NMR (471 MHz, Chloroform- $d$ )  $\delta$  = -62.6.  $^{13}\text{C}$   $\{^1\text{H}\}$  NMR (126 MHz, Chloroform- $d$ )  $\delta$  = 161.7, 151.4, 137.1, 134.9, 131.9, 131.5, 130.8, 130.2 (q,  $J$  = 32.5 Hz), 128.9, 124.9 (q,  $J$  = 3.8 Hz), 124.3 (q,  $J$  = 272.1 Hz), 120.2, 117.4, 104.9, 80.5, 34.7, 28.7 (signal of four carbons are absent, which may relate to signal overlap). (EI, 70 eV):  $m/z$  (%) = 323 (19), 265 (29), 237 (58), 222 (13), 163 (12), 142 (100). (EI): calcd. for  $\text{C}_{21}\text{H}_{15}\text{F}_3\text{N}_2\text{O}_2$  [ $\text{M}$ ] $^+$  384.10801, found: 384.10687.

**1,3-Dimethyl-5-(4-dimethylaminophenyl)-6-[2-(4-methylphenyl)ethynyl]uracil (5d).** According to general procedure D, compound **5d** was obtained as a brown solid in 54% yield (183 mg, 0.490 mmol,  $R_f$  = 0.15 heptane/ethyl acetate, 3: 2); mp: 126 – 128 °C. IR (ATR):  $\tilde{\nu}$  [ $\text{cm}^{-1}$ ] = 1697 (s), 642 (vs), 1580 (s), 1430 (s), 1306 (s), 1197 (s), 1125 (s), 813 (s), 748 (s).  $^1\text{H}$  NMR (300 MHz, Chloroform- $d$ )  $\delta$  = 7.45 – 7.38 (m, 2H), 7.24 – 7.18 (m, 2H), 7.16 – 7.09 (m, 2H), 6.80 – 6.73 (m, 2H), 3.68 (s, 3H), 3.42 (s, 3H), 2.99 (s, 6H), 2.35 (s, 3H).  $^{13}\text{C}$   $\{^1\text{H}\}$  NMR (75 MHz, Chloroform- $d$ )  $\delta$  = 162.4, 151.6, 150.4, 140.7, 133.0, 131.8, 131.6, 129.4, 120.7, 118.8, 118.0, 111.8, 103.9, 81.3, 40.6, 34.5, 28.6, 21.8 (signal of five carbons are absent, which may relate to signal overlap). (EI, 70 eV):  $m/z$  (%) = 373 ( $\text{M}^+$ , 100), 358 (9), 288 (14), 273 (15), 261 (9), 244 (9), 187 (15). (ESI-TOF): calcd. for  $\text{C}_{23}\text{H}_{24}\text{N}_3\text{O}_2$  [ $\text{M}+\text{H}$ ] $^+$  374.1868, found: 374.1864.

**1,3-Dimethyl-5-(4-trifluoromethylphenyl)-6-[2-(4-methylphenyl)ethynyl]uracil (5e).** According to general procedure D, compound **5e** was obtained as a brown solid in 41% yield (150 mg, 0.377 mmol,  $R_f$  = 0.22 heptane/ethyl acetate, 3: 2); mp: 140 – 142 °C. IR (ATR):  $\tilde{\nu}$  [ $\text{cm}^{-1}$ ] = 2211 (m), 1700 (s), 1644 (vs), 158 (s), 1430 (s), 1322 (vs), 1162 (s), 1067 (vs), 840 (s).  $^1\text{H}$  NMR (300 MHz, Chloroform- $d$ )  $\delta$  = 7.66 (q,  $J$  = 8.4 Hz, 4H), 7.11 (q,  $J$  = 8.3 Hz, 4H), 3.71 (s, 3H), 3.44 (s, 3H), 2.36 (s, 3H).  $^{19}\text{F}$  NMR (471 MHz, Chloroform- $d$ )  $\delta$  = -62.6.  $^{13}\text{C}$  { $^1\text{H}$ } NMR (75 MHz, Chloroform- $d$ )  $\delta$  = 161.7, 151.5, 141.6, 137.2 (d,  $J$  = 1.7 Hz), 135.1, 131.8, 131.5, 130.1 (q,  $J$  = 32.4 Hz), 129.6, 124.9 (q,  $J$  = 3.8 Hz), 124.3 (q,  $J$  = 272.1 Hz), 117.1, 117.0, 105.5, 80.2, 34.7, 28.6, 21.8 (signal of four carbons are absent, which may relate to signal overlap). (EI, 70 eV):  $m/z$  (%) = 398 ( $\text{M}^+$ , 80), 383 (61), 340 (25), 312 (35), 298 (31), 283 (19), 272 (17). (ESI-TOF): calcd. for  $\text{C}_{22}\text{H}_{18}\text{F}_3\text{N}_2\text{O}_2$  [ $\text{M}+\text{H}$ ] $^+$  399.1320, found: 399.1322.

**1,3-Dimethyl-5-[2-(4-methylphenyl)ethenyl]-6-[2-(4-methylphenyl)ethynyl]uracil (5f).** According to general procedure D, compound **5f** was obtained as a brown solid in 75% yield (125 mg, 0.338 mmol,  $R_f$  = 0.36 heptane/ethyl acetate, 3: 2); mp: 152 – 154 °C. IR (ATR):  $\tilde{\nu}$  [ $\text{cm}^{-1}$ ] = 2211 (m), 1702 (s), 1644 (vs), 1510 (s), 1432 (s), 1212 (s), 1131 (m), 838 (s), 774 (m).  $^1\text{H}$  NMR (300 MHz, Chloroform- $d$ )  $\delta$  = 8.03 (d,  $J$  = 16.2 Hz, 1H), 7.51 – 7.46 (m, 2H), 7.44 – 7.37 (m, 2H), 7.33 – 7.20 (m, 3H), 7.15 (d,  $J$  = 7.9 Hz, 2H), 3.67 (s, 3H), 3.43 (s, 3H), 2.43 (s, 3H), 2.35 (s, 3H).  $^{13}\text{C}$  { $^1\text{H}$ } NMR (75 MHz, Chloroform- $d$ )  $\delta$  = 161.6, 150.8, 141.3, 137.8, 135.6, 133.2, 133.1, 131.8, 129.8, 129.5, 126.5, 120.4, 117.7, 114.4, 107.8, 80.0, 34.6, 28.4, 21.9, 21.4 (signal of four carbons are absent, which may relate to signal overlap). (EI, 70 eV):  $m/z$  (%) = 370 ( $\text{M}^+$ , 98), 355 (100), 312 (51), 298 (68), 284 (79), 270 (82), 255 (25). (EI): calcd. for  $\text{C}_{24}\text{H}_{22}\text{N}_2\text{O}_2$  [ $\text{M}$ ] $^+$  370.16758, found: 370.16784.

**(E)-1,3-Dimethyl-6-(*p*-tolylethynyl)-5-(4-(trifluoromethyl)styryl)pyrimidine-2,4(1*H*,3*H*)-dione (5g).** According to general procedure D, compound **5g** was obtained as a brown solid in 41% yield (78.5 mg, 0.185 mmol,  $R_f$  = 0.32 heptane/ethyl acetate, 3: 2); mp: 127 – 129 °C. IR (ATR):  $\tilde{\nu}$  [ $\text{cm}^{-1}$ ] = 1702 (s), 1648 (s), 1510 (m), 1320 (vs), 1162 (s), 1065 (s), 816 (s), 727 (m).  $^1\text{H}$  NMR (300 MHz, Chloroform- $d$ )  $\delta$  = 8.09 (d,  $J$  = 16.2 Hz, 1H), 7.57 (m, 4H), 7.52 – 7.45 (m, 2H), 7.38 (d,  $J$  = 16.2 Hz, 1H), 7.31 – 7.21 (m, 2H), 3.70 (s, 3H), 3.44 (s, 3H), 2.43 (s, 3H).  $^{19}\text{F}$  NMR (282 MHz, Chloroform- $d$ )  $\delta$  = -62.4.  $^{13}\text{C}$  { $^1\text{H}$ } NMR (75 MHz, Chloroform- $d$ )  $\delta$  = 161.5, 150.8, 142.0 (d,  $J$  = 1.5 Hz), 141.8, 134.6, 131.8, 131.5, 129.9, 129.3 (q,  $J$  = 32.3 Hz), 126.6, 125.8 (q,  $J$  = 3.9 Hz), 124.4 (q,  $J$  = 271.9 Hz), 123.9, 117.4, 113.5, 108.5, 79.7, 34.7, 28.4, 21.9 (signal of four carbons are absent, which may relate to signal overlap). (EI, 70 eV):  $m/z$  (%) = 424 ( $\text{M}^+$ , 60), 409 (98), 366 (15), 338 (36), 324 (42), 267 (10), 183 (22). (EI): calcd. for  $\text{C}_{24}\text{H}_{19}\text{F}_3\text{N}_2\text{O}_2$  [ $\text{M}$ ] $^+$  424.13931, found: 424.13907.

**1,3-Dimethyl-5-(4-dimethylaminophenyl)-6-[2-(biphenyl)ethynyl]uracil (5i).** According to general procedure D, compound **5i** was obtained as a brown solid in 52% yield (85.2 mg, 0.199 mmol,  $R_f$  = 0.15 heptane/ethyl acetate, 3: 2); mp: 177 – 179 °C. IR (ATR):  $\tilde{\nu}$  [ $\text{cm}^{-1}$ ] = 2921 (m), 1693 (s), 1642 (vs), 1510 (s), 1432 (s), 1308 (s), 1215 (s), 816 (s).  $^1\text{H}$  NMR (300 MHz, Chloroform- $d$ )  $\delta$  = 7.61 – 7.53 (m, 4H), 7.50 – 7.35 (m, 7H), 6.83 – 6.76 (m, 2H), 3.72 (s, 3H), 3.44 (s, 3H), 3.01 (s, 6H).  $^{13}\text{C}$   $\{^1\text{H}\}$  NMR (75 MHz, Chloroform- $d$ )  $\delta$  = 162.4, 151.7, 150.5, 142.9, 139.9, 132.8, 132.4, 131.7, 129.1, 128.2, 127.3, 127.2, 120.6, 119.8, 119.2, 111.8, 103.4, 82.4, 40.7, 34.5, 28.6 (signal of seven carbons are absent, which may relate to signal overlap). (EI, 70 eV):  $m/z$  (%) = 435 ( $\text{M}^+$ , 100), 350 (14), 335 (13), 331 (10), 281 (21), 218 (37), 207 (18). (ESI-TOF): calcd. for  $\text{C}_{28}\text{H}_{26}\text{N}_3\text{O}_2$  [ $\text{M}+\text{H}$ ] $^+$  436.2025, found: 436.2025.

**1,3-Dimethyl-5-(4-*tert*-butylphenyl)-6-[2-(4-*tert*-butylphenyl)ethynyl]uracil (5j).** According to general procedure D, compound **5j** was obtained as a brown solid in 74% yield (43.6 mg, 0.102 mmol,  $R_f$  = 0.30 heptane/ethyl acetate, 3: 2); mp: 169 – 171 °C. IR (ATR):  $\tilde{\nu}$  [ $\text{cm}^{-1}$ ] = 2905 (m), 1695 (s), 1644 (vs), 1456 (s), 1306 (m), 1106 (m), 999 (m), 832 (s).  $^1\text{H}$  NMR (500 MHz, Chloroform- $d$ )  $\delta$  = 7.47 – 7.39 (m, 4H), 7.33 – 7.29 (m, 2H), 7.14 – 7.11 (m, 2H), 3.70 (s, 3H), 3.44 (s, 3H), 1.37 (s, 9H), 1.29 (s, 9H).  $^{13}\text{C}$   $\{^1\text{H}\}$  NMR (126 MHz, Chloroform- $d$ )  $\delta$  = 162.2, 154.1, 151.7, 151.1, 134.4, 131.8, 130.6, 130.3, 125.7, 125.0, 118.8, 117.8, 104.6, 80.9, 35.2, 34.8, 34.6, 31.5, 31.2, 28.6 (signal of eight carbons are absent, which may relate to signal overlap). (EI, 70 eV):  $m/z$  (%) = 428 ( $\text{M}^+$ , 36), 413 (16), 371 (72), 357 (12), 315 (100), 258 (15), 230 (13). (ESI-TOF): calcd. for  $\text{C}_{28}\text{H}_{33}\text{N}_2\text{O}_2$  [ $\text{M}+\text{H}$ ] $^+$  429.2542, found: 429.2534.

**1,3-Dimethyl-5-(4-methylphenyl)-6-[2-(4-dimethylaminophenyl)ethynyl]uracil (5k).** According to general procedure D, compound **5k** was obtained as a brown solid in 84% yield (263 mg, 0.703 mmol,  $R_f$  = 0.13 heptane/ethyl acetate, 3: 2); mp: 175 – 177 °C. IR (ATR):  $\tilde{\nu}$  [ $\text{cm}^{-1}$ ] = 2917 (m), 1697 (s), 1522 (s), 1415 (s), 1310 (s), 1131 (s), 1061 (s), 818 (vs).  $^1\text{H}$  NMR (300 MHz, Chloroform- $d$ )  $\delta$  = 7.43 – 7.37 (m, 2H), 7.25 – 7.19 (m, 2H), 7.13 – 7.08 (m, 2H), 6.60 – 6.54 (m, 2H), 3.68 (s, 3H), 3.42 (s, 3H), 3.00 (s, 6H), 2.40 (s, 3H).  $^{13}\text{C}$   $\{^1\text{H}\}$  NMR (75 MHz, Chloroform- $d$ )  $\delta$  = 162.3, 151.8, 151.3, 137.6, 134.9, 133.4, 130.8, 130.6, 128.5, 116.8, 111.6, 107.1, 106.7, 80.4, 40.1, 34.5, 28.5, 21 (signal of five carbons are absent, which may relate to signal overlap). (EI, 70 eV):  $m/z$  (%) = 373 ( $\text{M}^+$ , 100), 316 (2), 287 (3), 261 (3), 228 (2), 215 (3), 202 (4). (ESI-TOF): calcd. for  $\text{C}_{23}\text{H}_{24}\text{N}_3\text{O}_2$  [ $\text{M}+\text{H}$ ] $^+$  374.1868, found: 374.1861.

**1,3-Dimethyl-5-(4-trifluoromethylphenyl)-6-[2-(4-dimethylaminophenyl)ethynyl]uracil (5l).** According to general procedure D, compound **5l** was obtained as a brown solid in 70% yield (124 mg, 0.289 mmol,  $R_f$  = 0.08 heptane/ethyl acetate, 3: 2); mp: 162 – 164 °C. IR



(ATR):  $\tilde{\nu}$  [ $\text{cm}^{-1}$ ] = 2196 (m), 1693 (s), 1607 (vs), 1574 (vs), 1430 (s), 1310 (s), 1120 (s), 1057 (s).  $^1\text{H}$  NMR (300 MHz, Chloroform-*d*)  $\delta$  =  $\delta$  7.71 – 7.62 (m, 4H), 7.08 – 7.02 (m, 2H), 6.61 – 6.56 (m, 2H), 3.71 (s, 3H), 3.44 (s, 3H), 3.01 (s, 6H).  $^{19}\text{F}$  NMR (282 MHz, Chloroform-*d*)  $\delta$  = -62.5.  $^{13}\text{C}$   $\{^1\text{H}\}$  NMR (63 MHz, Chloroform-*d*)  $\delta$  = 161.8, 151.6, 151.5, 137.7, 135.9, 133.5, 131.6, 129.8 (q,  $J$  = 64.8, 32.3 Hz), 124.8 (q,  $J$  = 3.8 Hz), 124.4 (q,  $J$  = 544.1, 272.0 Hz), 115.3, 111.8, 108.4, 106.1, 80.1, 40.2, 34.7, 28.6 (signal of five carbons are absent, which may relate to signal overlap). (EI, 70 eV):  $m/z$  (%) = 427 ( $\text{M}^+$ , 100), 369 (12), 341 (17), 327 (13), 312 (5), 298 (9), 273 (4). (ESI-TOF): calcd. for  $\text{C}_{23}\text{H}_{21}\text{F}_3\text{N}_3\text{O}_2$  [ $\text{M}+\text{H}$ ] $^+$  428.1586, found: 428.1587.

**1,3-Dimethyl-5-(4-dimethylaminophenyl)-6-[2-(4-dimethylaminophenyl)ethynyl]uracil**

**(5m).** According to general procedure D, compound **5m** was obtained as a brown solid in 26% yield (86.9 mg, 0.216 mmol,  $R_f$  = 0.17 heptane/ethyl acetate, 3: 2); mp: 188 – 190 °C. IR (ATR):  $\tilde{\nu}$  [ $\text{cm}^{-1}$ ] = 2194 (m), 1691 (s), 1605 (vs), 1520 (s), 1409 (s), 1310 (s), 1188 (s), 1015 (s), 818 (vs).  $^1\text{H}$  NMR (500 MHz, Chloroform-*d*)  $\delta$  = 7.46 – 7.40 (m, 2H), 7.21 – 7.14 (m, 2H), 6.81 – 6.74 (m, 2H), 6.60 – 6.54 (m, 2H), 3.68 (s, 3H), 3.42 (s, 3H), 3.00 – 2.99 (m, 12H).  $^{13}\text{C}$   $\{^1\text{H}\}$  NMR (126 MHz, Chloroform-*d*)  $\delta$  = 162.6, 151.8, 151.2, 150.3, 133.9, 133.4, 131.7, 121.2, 117.2, 111.9, 111.6, 107.1, 106.4, 80.8, 40.8, 40.1, 34.5, 28.5 (signal of six carbons are absent, which may relate to signal overlap). (EI, 70 eV):  $m/z$  (%) = 402 ( $\text{M}^+$ , 100), 388 (15), 361 (5), 345 (5), 316 (5), 301 (5), 273 (5). (ESI-TOF): calcd. for  $\text{C}_{24}\text{H}_{27}\text{N}_4\text{O}_2$  [ $\text{M}+\text{H}$ ] $^+$  403.2129, found: 403.2135.

**1,3-Dimethyl-6-[2-(4-fluorophenyl)ethynyl]-5-(4-dimethylaminophenyl)uracil (5p).**

According to general procedure D, compound **5p** was obtained as a brown solid in 38% yield (64.6 mg, 0.171 mmol,  $R_f$  = 0.18 heptane/ethyl acetate, 3: 2); mp: 130 – 132 °C. IR (ATR):  $\tilde{\nu}$  [ $\text{cm}^{-1}$ ] = 2853 (m), 2209 (m), 1638 (vs), 1504 (s), 1312 (s), 1219 (s), 1133 (s), 846 (s).  $^1\text{H}$  NMR (300 MHz, Chloroform-*d*)  $\delta$  = 7.43 – 7.37 (m, 2H), 7.34 – 7.27 (m, 2H), 7.06 – 6.98 (m, 2H), 6.79 – 6.74 (m, 2H), 3.68 (s, 3H), 3.43 (s, 3H), 2.99 (s, 6H).  $^{19}\text{F}$  NMR (282 MHz, Chloroform-*d*)  $\delta$  = -107.3.  $^{13}\text{C}$   $\{^1\text{H}\}$  NMR (75 MHz, Chloroform-*d*)  $\delta$  = 163.5 (d,  $J$  = 253.0 Hz), 162.3, 151.5, 150.4, 133.9 (d,  $J$  = 8.7 Hz), 132.6, 131.5, 120.4, 119.2, 117.1 (d,  $J$  = 3.5 Hz), 116.1 (d,  $J$  = 22.3 Hz), 111.7, 102.1, 81.4, 40.5, 34.4, 28.5 (signal of five carbons are absent, which may relate to signal overlap). (EI, 70 eV):  $m/z$  (%) = 377 ( $\text{M}^+$ , 95), 320 (22), 292 (42), 276 (15), 265 (13), 248 (16), 207 (13). (EI): calcd. for  $\text{C}_{22}\text{H}_{20}\text{FN}_3\text{O}_2$  [ $\text{M}$ ] $^+$  377.15341, found: 377.15319.

**1,3-Dimethyl-6-[2-(4-trifluoromethylphenyl)ethynyl]-5-(4-dimethylaminophenyl)uracil**

**(5q).** According to general procedure D, compound **5q** was obtained as a brown solid in 33% yield (37.4 mg, 87.5  $\mu$ mol,  $R_f$  = 0.15 heptane/ethyl acetate, 3: 2); mp: 148 – 150 °C. IR (ATR):  $\tilde{\nu}$  [ $\text{cm}^{-1}$ ] = 2188 (s), 1638 (vs), 1524 (s), 1322 (vs), 1188 (s), 1120 (vs), 1065 (vs), 840 (s).  $^1\text{H}$  NMR (500 MHz, Chloroform-*d*)  $\delta$  = 7.70 – 7.63 (m, 4H), 7.06 – 7.02 (m, 2H), 6.59 – 6.54 (m, 2H), 3.70 (s, 3H), 3.44 (s, 3H), 3.01 (s, 6H).  $^{19}\text{F}$  NMR (471 MHz, Chloroform-*d*)  $\delta$  = -62.5.  $^{13}\text{C}$  { $^1\text{H}$ } NMR (75 MHz, Chloroform-*d*)  $\delta$  = 161.8, 151.6, 151.6, 137.7, 136.0, 133.5, 131.6, 129.8 (q,  $J$  = 32.4 Hz), 124.8 (q,  $J$  = 3.8 Hz), 124.4 (q,  $J$  = 272.0 Hz), 115.3, 111.7, 108.5, 106.0, 80.1, 40.1, 34.7, 28.6 (signal of five carbons are absent, which may relate to signal overlap). (EI, 70 eV):  $m/z$  (%) = 427 ( $\text{M}^+$ , 100), 369 (13), 326 (11), 312 (5), 298 (10), 214 (9), 170 (26). (ESI-TOF): calcd. for  $\text{C}_{23}\text{H}_{21}\text{F}_3\text{N}_3\text{O}_2$  [ $\text{M}+\text{H}$ ] $^+$  428.1586, found: 428.1575.

**6-((4-(Dimethylamino)phenyl)ethynyl)-1,3-dimethyl-5-(thiophen-3-yl)pyrimidine-**

**2,4(1H,3H)-dione (5r).** According to general procedure D, compound **5r** was obtained as a brown solid in 95% yield (143 mg, 0.391 mmol,  $R_f$  = 0.17 heptane/ethyl acetate, 3: 2); mp: 207 – 209 °C. IR (ATR):  $\tilde{\nu}$  [ $\text{cm}^{-1}$ ] = 2919 (m), 1691 (s), 1568 (s), 1409 (s), 1364 (vs), 1184 (vs), 1011 (s), 801 (vs).  $^1\text{H}$  NMR (300 MHz, Chloroform-*d*)  $\delta$  = 7.65 (dd,  $J$  = 3.0, 1.3 Hz, 1H), 7.43 (dd,  $J$  = 5.0, 1.3 Hz, 1H), 7.33 (dd,  $J$  = 5.0, 3.0 Hz, 1H), 7.28 – 7.17 (m, 2H), 6.65 – 6.58 (m, 2H), 3.69 (s, 3H), 3.43 (s, 3H), 3.01 (s, 6H).  $^{13}\text{C}$  { $^1\text{H}$ } NMR (75 MHz, Chloroform-*d*)  $\delta$  = 161.9, 151.5, 151.4, 134.5, 133.5, 132.9, 130.6, 129.8, 126.2, 123.6, 111.7, 107.7, 106.6, 80.7, 40.1, 34.6, 28.6 (signal of three carbons are absent, which may relate to signal overlap). (EI, 70 eV):  $m/z$  (%) = 364 ( $\text{M}^+$ , 86), 349 (28), 332 (80), 321 (67), 308 (90), 293 (93), 280(93). (ESI-TOF): calcd. for  $\text{C}_{20}\text{H}_{20}\text{N}_3\text{O}_2\text{S}$  [ $\text{M}+\text{H}$ ] $^+$  366.1276, found: 366.1279.

**5-(4-(Dimethylamino)phenyl)-1,3-dimethyl-6-(thiophen-3-ylethynyl)pyrimidine-**

**2,4(1H,3H)-dione (5s).** According to general procedure D, compound **5s** was obtained as a brown solid in 40% yield (66.8 mg, 0.183 mmol,  $R_f$  = 0.13 heptane/ethyl acetate, 3: 2); mp: 142 – 144 °C. IR (ATR):  $\tilde{\nu}$  [ $\text{cm}^{-1}$ ] = 2213 (m), 1634 (vs), 1524 (s), 1407 (s), 1304 (s), 1201 (m), 1127 (s), 791 (s).  $^1\text{H}$  NMR (300 MHz, Chloroform-*d*)  $\delta$  = 7.47 – 7.36 (m, 3H), 7.33 – 7.24 (m, 1H), 7.04 – 6.98 (m, 1H), 6.80 – 6.73 (m, 2H), 3.67 (s, 3H), 3.43 (s, 3H), 2.99 (s, 6H).  $^{13}\text{C}$  { $^1\text{H}$ } NMR (75 MHz, Chloroform-*d*)  $\delta$  = 162.5, 151.7, 150.5, 132.9, 131.7, 131.5, 129.5, 126.2, 120.6, 120.3, 119.0, 111.8, 98.8, 81.5, 40.7, 34.5, 28.6 (signal of three carbons are absent, which may relate to signal overlap). (EI, 70 eV):  $m/z$  (%) = 365 ( $\text{M}^+$ , 100), 307 (7), 279 (14), 265 (20), 236 (9), 209 (5), 183 (14). (ESI-TOF): calcd. for  $\text{C}_{20}\text{H}_{20}\text{N}_3\text{O}_2\text{S}$  [ $\text{M}+\text{H}$ ] $^+$  366.1276, found: 366.1270.

**5-(Furan-3-yl)-1,3-dimethyl-6-(*p*-tolylethynyl)pyrimidine-2,4(1*H*,3*H*)-dione (5t).** According to general procedure D, compound **5t** was obtained as a brown solid in 76% yield (110 mg, 0.342 mmol,  $R_f$  = 0.38 heptane/ethyl acetate, 3: 2); mp: 128 – 130 °C. IR (ATR):  $\tilde{\nu}$  [cm<sup>-1</sup>] = 1638 (vs), 1508 (m), 1450 (s), 1316 (m), 1164 (m), 1028 (s), 811 (s), 750 (vs). <sup>1</sup>H NMR (300 MHz, Chloroform-*d*)  $\delta$  = 8.06 (dd,  $J$  = 1.6, 0.8 Hz, 1H), 7.48 – 7.46 (m, 1H), 7.41 – 7.36 (m, 2H), 7.24 – 7.18 (m, 2H), 6.98 (dd,  $J$  = 1.9, 0.8 Hz, 1H), 3.70 (s, 3H), 3.43 (s, 3H), 2.40 (s, 3H). <sup>13</sup>C {<sup>1</sup>H} NMR (75 MHz, Chloroform-*d*)  $\delta$  = 161.6, 151.2, 143.9, 141.7, 141.4, 132.3, 131.8, 129.7, 117.6, 117.0, 111.3, 110.5, 105.5, 81.1, 34.5, 28.7, 21.9 (signal of two carbons are absent, which may relate to signal overlap). (EI, 70 eV):  $m/z$  (%) = 320 (M<sup>+</sup>, 62), 291 (15), 277 (14), 262 (43), 235 (53), 220 (33), 208 (100). (ESI-TOF): calcd. for C<sub>19</sub>H<sub>17</sub>N<sub>2</sub>O<sub>3</sub> [M+H]<sup>+</sup> 321.1239, found: 321.1234.

# $^1\text{H}$ , $^{13}\text{C}$ , and $^{19}\text{F}$ NMR spectra

## 5-Bromo-6-chloro-1,3-dimethyluracil (2)

| Parameter                | Value        |
|--------------------------|--------------|
| 1 Solvent                | DMSO         |
| 2 Temperature            | 298.2        |
| 3 Pulse Sequence         | zg30         |
| 4 Experiment             | 1D           |
| 5 Number of Scans        | 16           |
| 6 Receiver Gain          | 203.0        |
| 7 Relaxation Delay       | 2.0000       |
| 8 Pulse Width            | 10.0000      |
| 9 Spectrometer Frequency | 800.13       |
| 10 Spectral Width        | 6188.1       |
| 11 Lowest Frequency      | -1240.3      |
| 12 Nucleus               | $^1\text{H}$ |
| 13 Acquired Size         | 32768        |
| 14 Spectral Size         | 65536        |

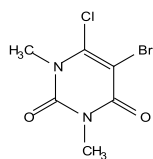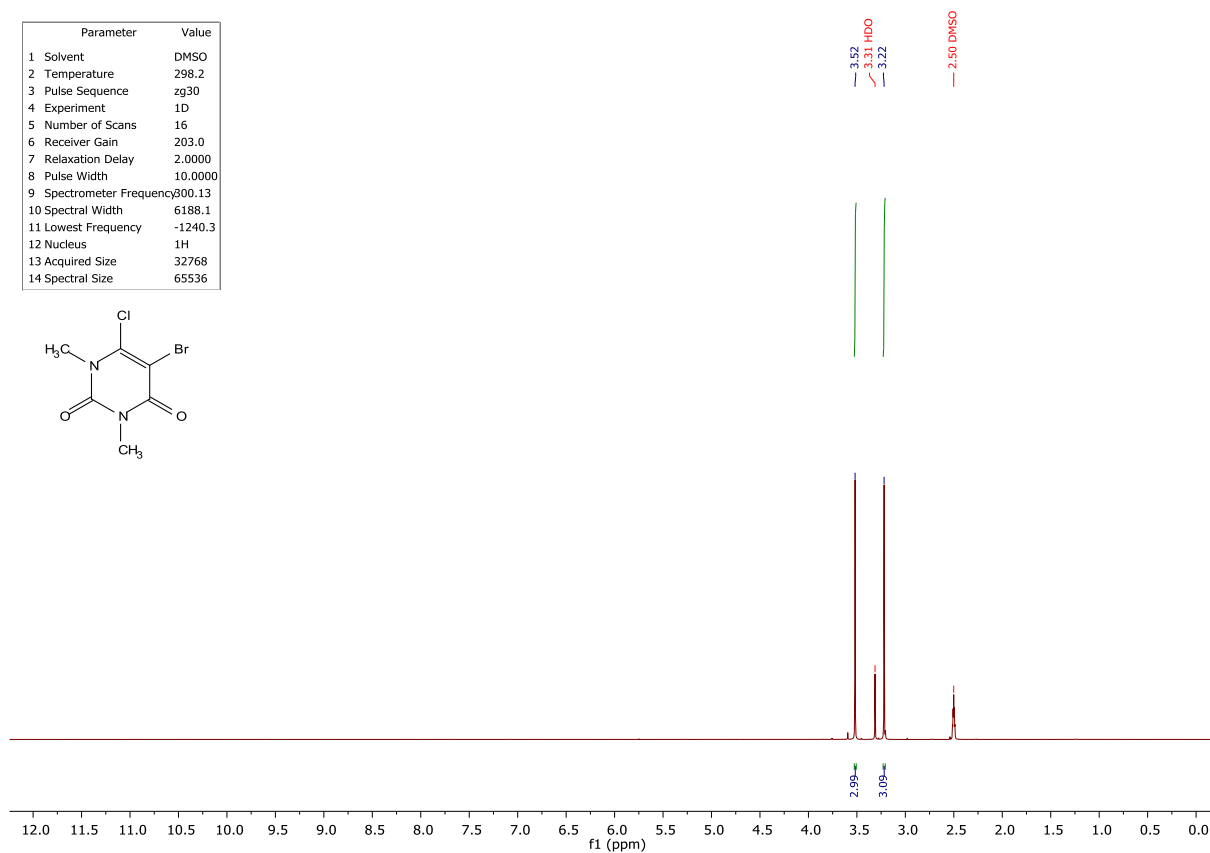

| Parameter                | Value           |
|--------------------------|-----------------|
| 1 Solvent                | DMSO            |
| 2 Temperature            | 298.2           |
| 3 Pulse Sequence         | zgpg30          |
| 4 Experiment             | 1D              |
| 5 Number of Scans        | 1024            |
| 6 Receiver Gain          | 2050.0          |
| 7 Relaxation Delay       | 2.0000          |
| 8 Pulse Width            | 10.0000         |
| 9 Spectrometer Frequency | 75.48           |
| 10 Spectral Width        | 18028.8         |
| 11 Lowest Frequency      | -1503.7         |
| 12 Nucleus               | $^{13}\text{C}$ |
| 13 Acquired Size         | 32768           |
| 14 Spectral Size         | 65536           |

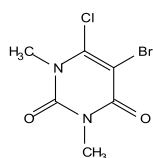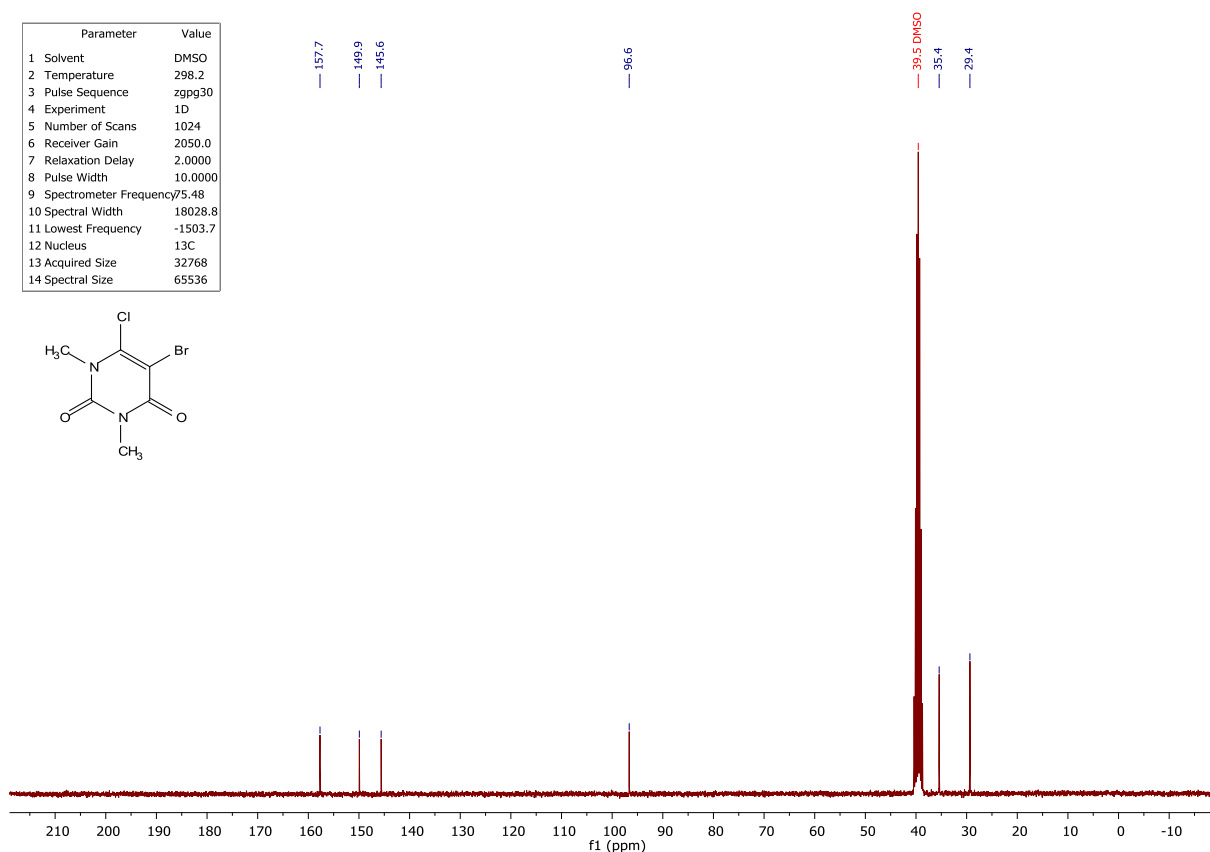

# 5-Bromo-1,3-dimethyl-6-[2-(4-methylphenyl)ethynyl]uracil (3a)

| Parameter                | Value             |
|--------------------------|-------------------|
| 1 Solvent                | CDCl <sub>3</sub> |
| 2 Temperature            | 298.2             |
| 3 Pulse Sequence         | zg30              |
| 4 Experiment             | 1D                |
| 5 Number of Scans        | 16                |
| 6 Receiver Gain          | 406.0             |
| 7 Relaxation Delay       | 2.0000            |
| 8 Pulse Width            | 10.0000           |
| 9 Spectrometer Frequency | 800.13            |
| 10 Spectral Width        | 6188.1            |
| 11 Lowest Frequency      | -1267.0           |
| 12 Nucleus               | <sup>1</sup> H    |
| 13 Acquired Size         | 32768             |
| 14 Spectral Size         | 65536             |

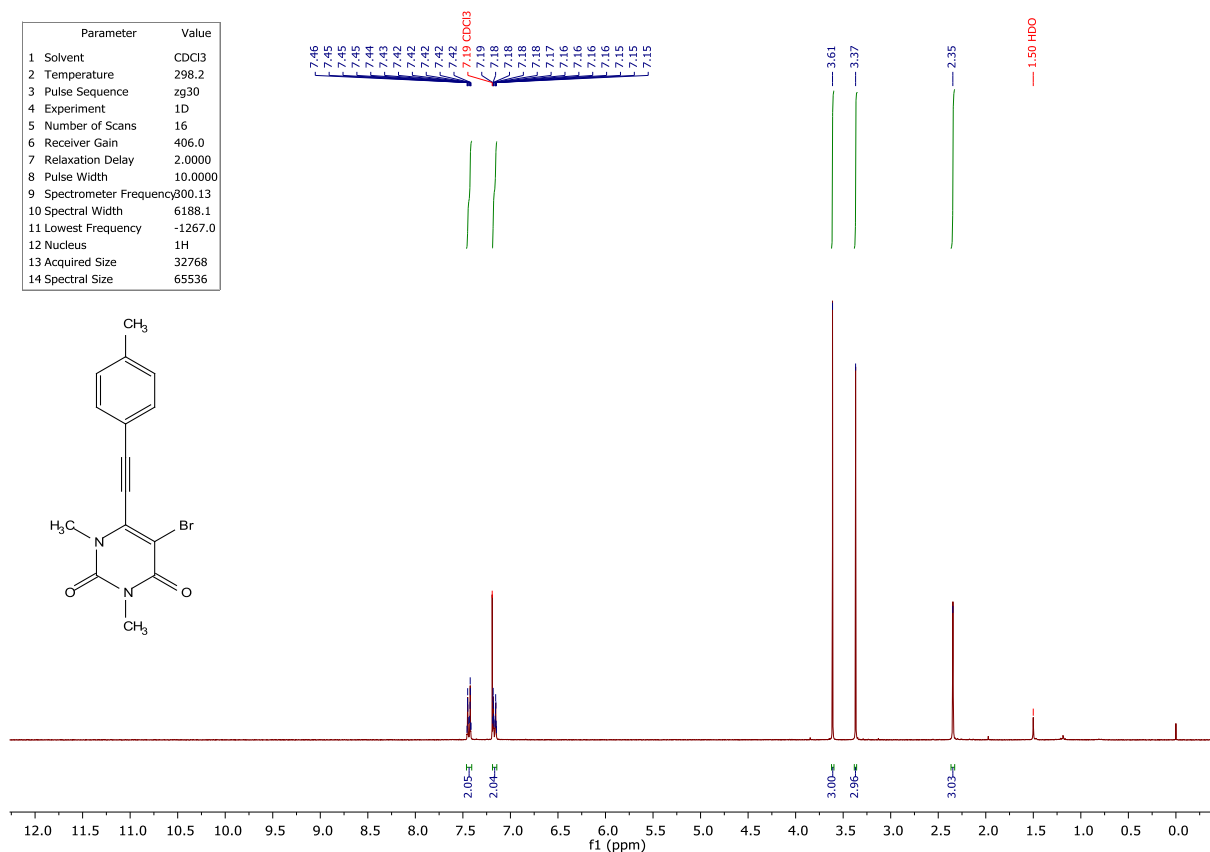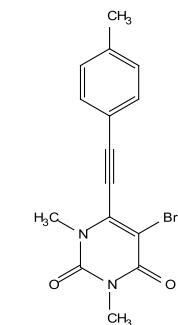

| Parameter                | Value             |
|--------------------------|-------------------|
| 1 Solvent                | CDCl <sub>3</sub> |
| 2 Temperature            | 298.4             |
| 3 Pulse Sequence         | zgpg30            |
| 4 Experiment             | 1D                |
| 5 Number of Scans        | 1024              |
| 6 Receiver Gain          | 2050.0            |
| 7 Relaxation Delay       | 2.0000            |
| 8 Pulse Width            | 10.0000           |
| 9 Spectrometer Frequency | 75.48             |
| 10 Spectral Width        | 18028.8           |
| 11 Lowest Frequency      | -1468.1           |
| 12 Nucleus               | <sup>13</sup> C   |
| 13 Acquired Size         | 32768             |
| 14 Spectral Size         | 65536             |

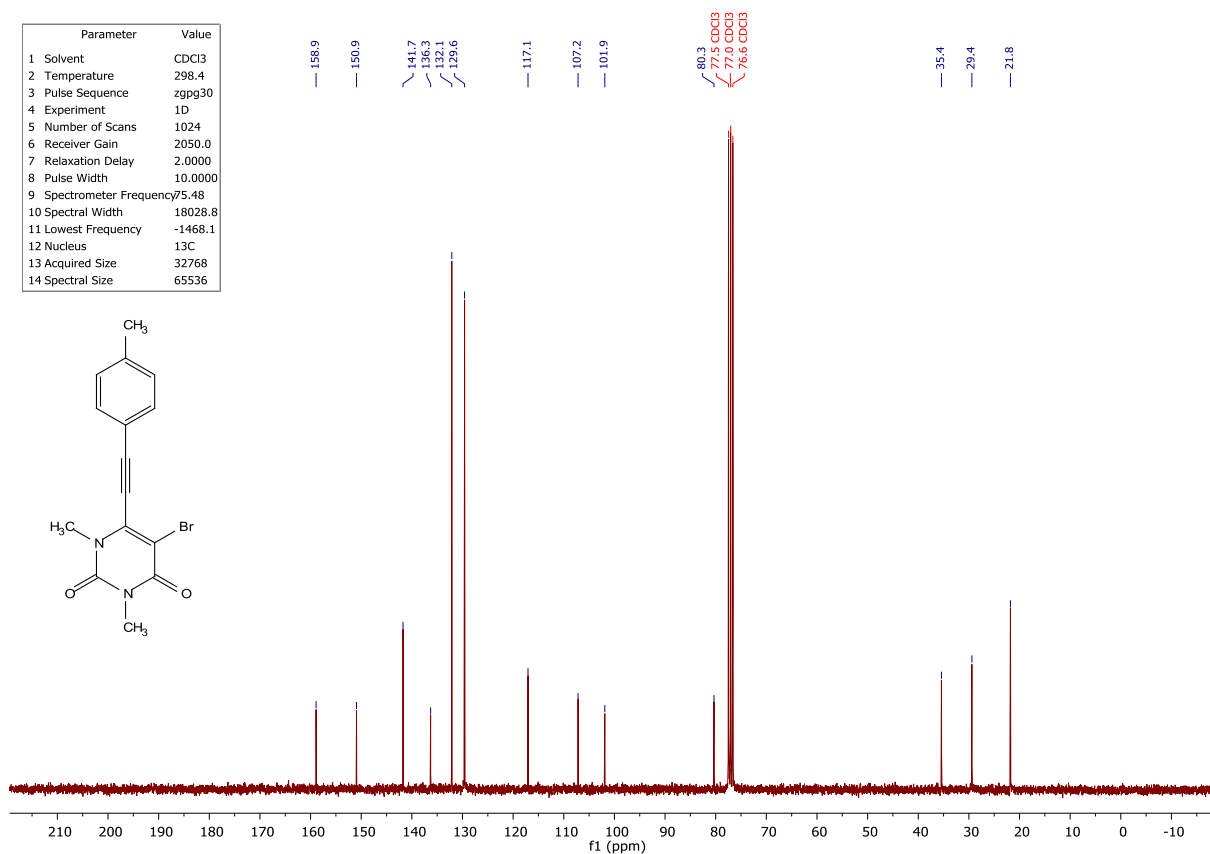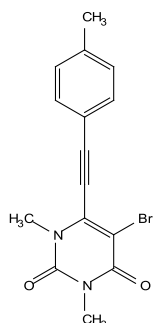

# 5-Bromo-1,3-dimethyl-6-[2-(phenyl)ethynyl]uracil (3b)

| Parameter                | Value             |
|--------------------------|-------------------|
| 1 Solvent                | CDCl <sub>3</sub> |
| 2 Temperature            | 298.2             |
| 3 Pulse Sequence         | zg30              |
| 4 Experiment             | 1D                |
| 5 Number of Scans        | 16                |
| 6 Receiver Gain          | 322.0             |
| 7 Relaxation Delay       | 2.0000            |
| 8 Pulse Width            | 10.0000           |
| 9 Spectrometer Frequency | 800.13            |
| 10 Spectral Width        | 6188.1            |
| 11 Lowest Frequency      | -1246.5           |
| 12 Nucleus               | <sup>1</sup> H    |
| 13 Acquired Size         | 32768             |
| 14 Spectral Size         | 65536             |

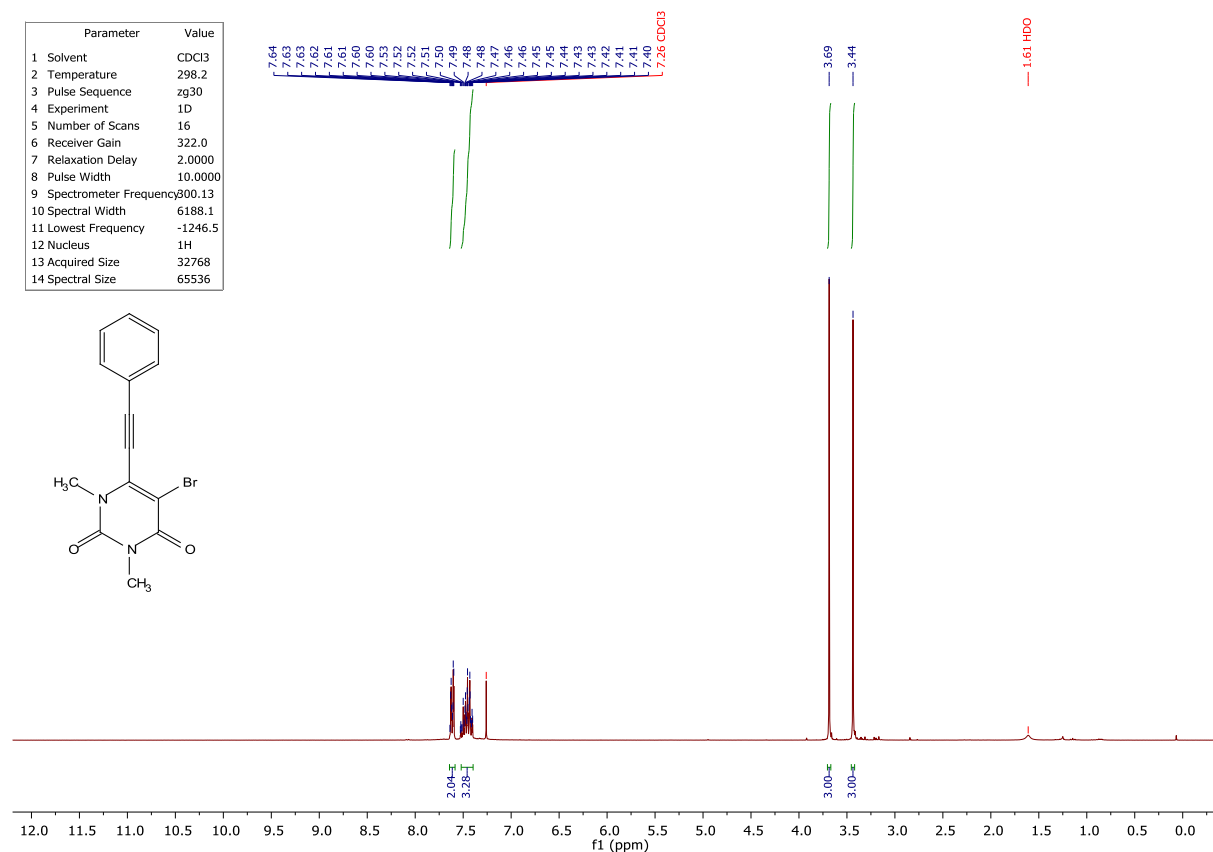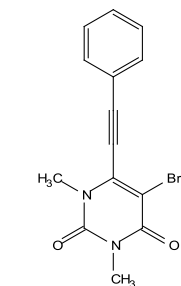

| Parameter                | Value             |
|--------------------------|-------------------|
| 1 Solvent                | CDCl <sub>3</sub> |
| 2 Temperature            | 298.9             |
| 3 Pulse Sequence         | zgpg30            |
| 4 Experiment             | 1D                |
| 5 Number of Scans        | 1024              |
| 6 Receiver Gain          | 2050.0            |
| 7 Relaxation Delay       | 2.0000            |
| 8 Pulse Width            | 10.0000           |
| 9 Spectrometer Frequency | 75.48             |
| 10 Spectral Width        | 18028.8           |
| 11 Lowest Frequency      | -1457.9           |
| 12 Nucleus               | <sup>13</sup> C   |
| 13 Acquired Size         | 32768             |
| 14 Spectral Size         | 65536             |

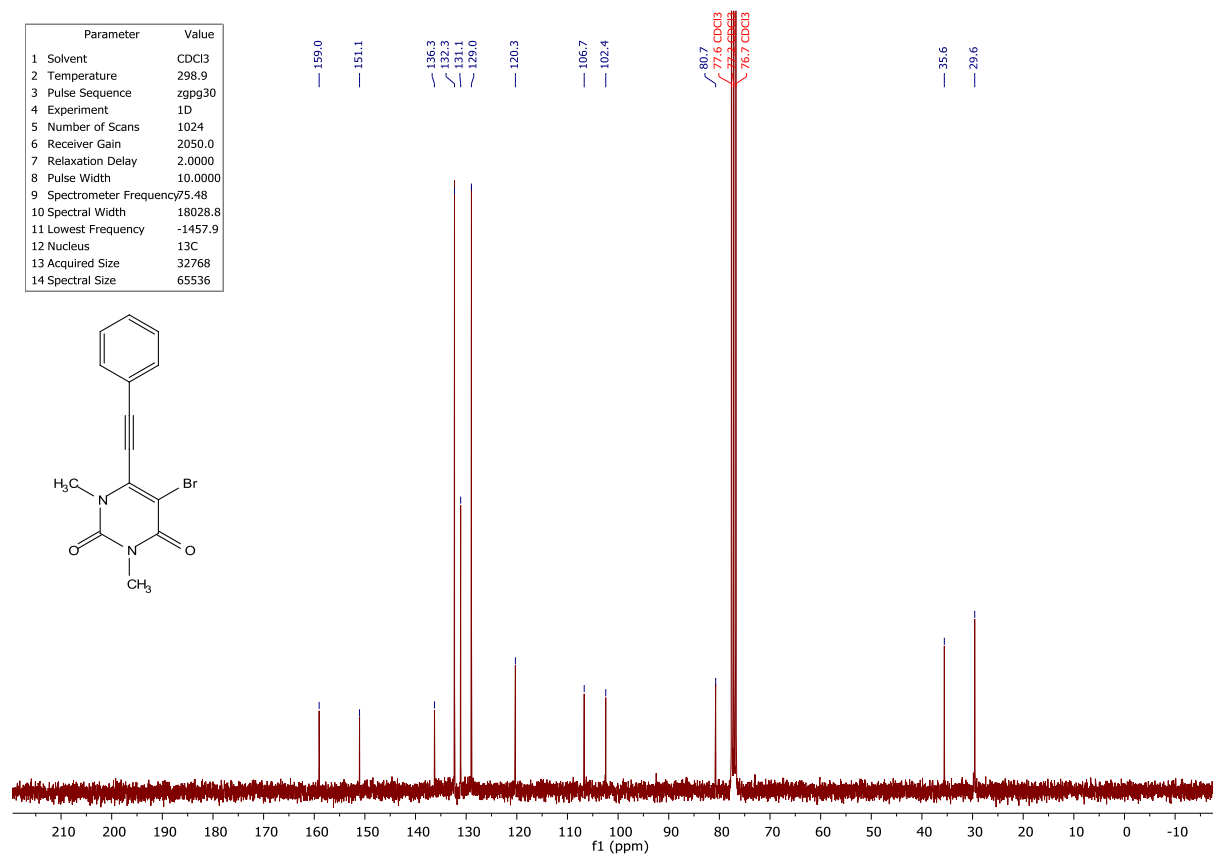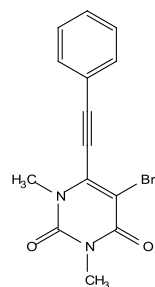

# 5-Bromo-1,3-dimethyl-6-[2-(4-fluorophenyl)ethynyl]uracil (3c)

| Parameter                | Value             |
|--------------------------|-------------------|
| 1 Solvent                | CDCl <sub>3</sub> |
| 2 Temperature            | 298.2             |
| 3 Pulse Sequence         | zg30              |
| 4 Experiment             | 1D                |
| 5 Number of Scans        | 16                |
| 6 Receiver Gain          | 287.0             |
| 7 Relaxation Delay       | 2.0000            |
| 8 Pulse Width            | 10.0000           |
| 9 Spectrometer Frequency | 800.13            |
| 10 Spectral Width        | 6188.1            |
| 11 Lowest Frequency      | -1246.6           |
| 12 Nucleus               | <sup>1</sup> H    |
| 13 Acquired Size         | 32768             |
| 14 Spectral Size         | 65536             |

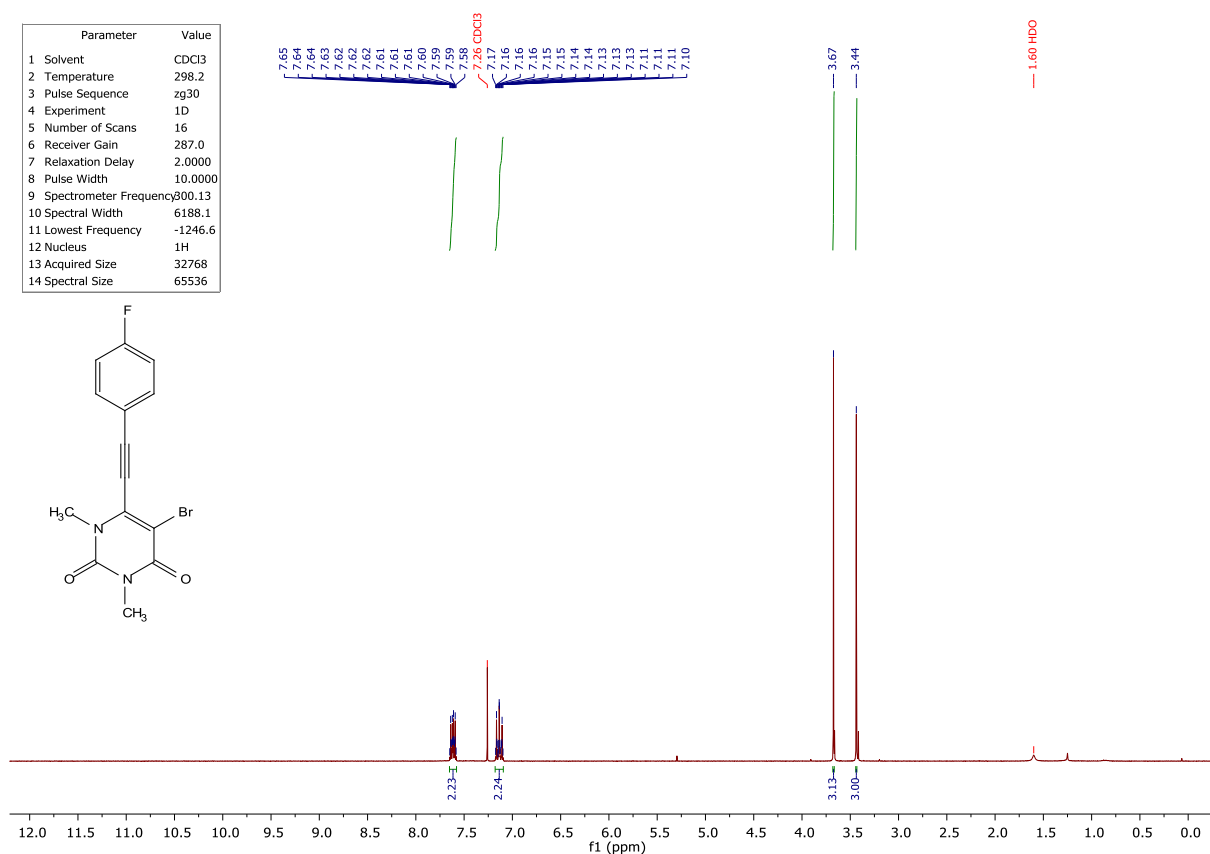

| Parameter                | Value             |
|--------------------------|-------------------|
| 1 Solvent                | CDCl <sub>3</sub> |
| 2 Temperature            | 298.2             |
| 3 Pulse Sequence         | zgfhgqn           |
| 4 Experiment             | 1D                |
| 5 Number of Scans        | 64                |
| 6 Receiver Gain          | 2050.0            |
| 7 Relaxation Delay       | 1.0000            |
| 8 Pulse Width            | 10.0000           |
| 9 Spectrometer Frequency | 282.38            |
| 10 Spectral Width        | 66964.3           |
| 11 Lowest Frequency      | -61722.4          |
| 12 Nucleus               | <sup>19</sup> F   |
| 13 Acquired Size         | 65536             |
| 14 Spectral Size         | 131072            |

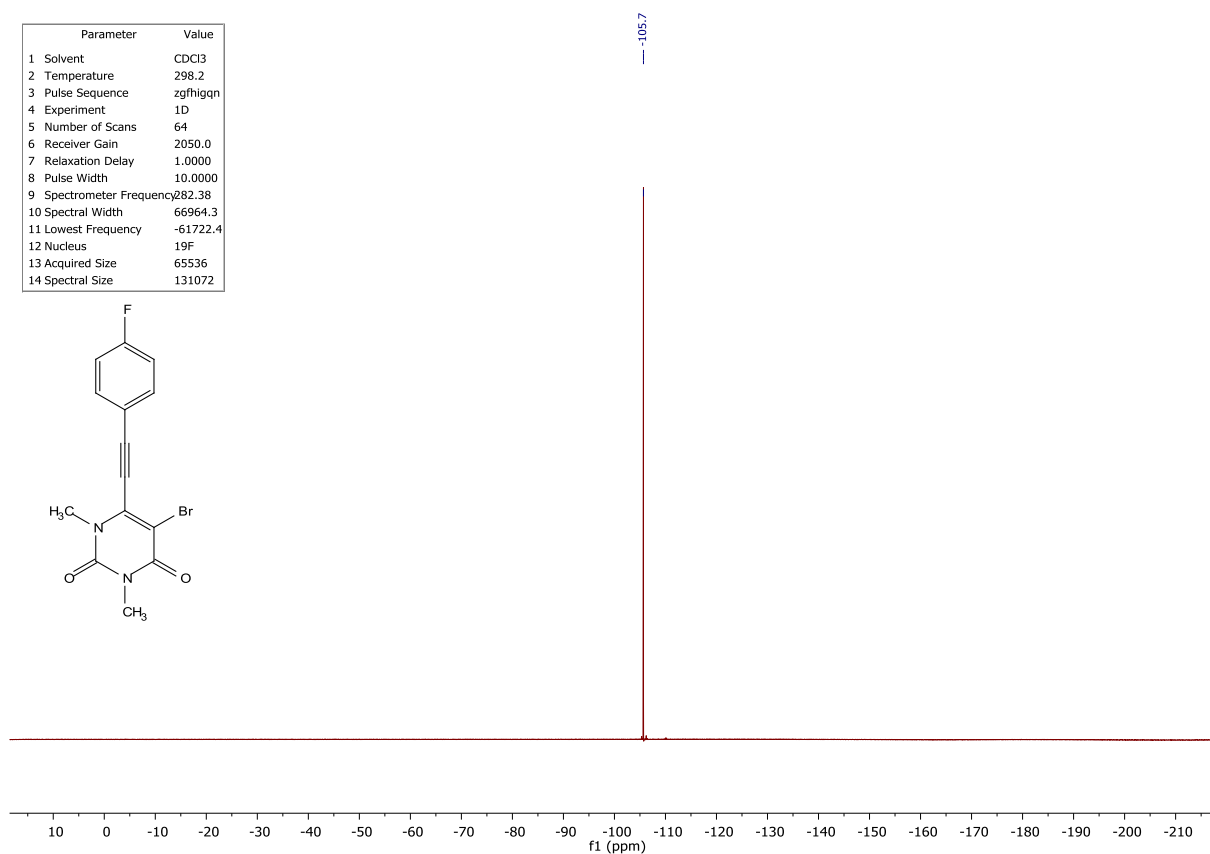

| Parameter                | Value           |
|--------------------------|-----------------|
| 1 Solvent                | CDCl3           |
| 2 Temperature            | 299.7           |
| 3 Pulse Sequence         | zgpg30          |
| 4 Experiment             | 1D              |
| 5 Number of Scans        | 1024            |
| 6 Receiver Gain          | 2050.0          |
| 7 Relaxation Delay       | 2.0000          |
| 8 Pulse Width            | 10.0000         |
| 9 Spectrometer Frequency | 75.48           |
| 10 Spectral Width        | 18028.8         |
| 11 Lowest Frequency      | -1468.1         |
| 12 Nucleus               | <sup>13</sup> C |
| 13 Acquired Size         | 32768           |
| 14 Spectral Size         | 65536           |

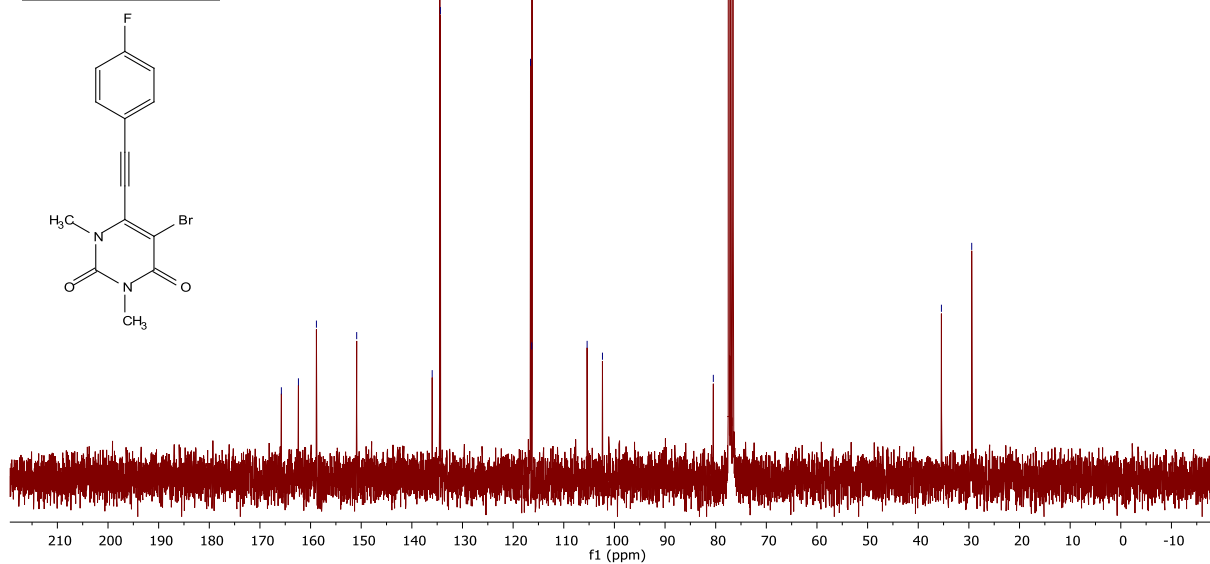



# 5-Bromo-1,3-dimethyl-6-[2-(4-*tert*-butylphenyl)ethynyl]uracil (3d)

| Parameter                | Value             |
|--------------------------|-------------------|
| 1 Solvent                | CDCl <sub>3</sub> |
| 2 Temperature            | 298.2             |
| 3 Pulse Sequence         | zg30              |
| 4 Experiment             | 1D                |
| 5 Number of Scans        | 16                |
| 6 Receiver Gain          | 90.5              |
| 7 Relaxation Delay       | 2.0000            |
| 8 Pulse Width            | 10.0000           |
| 9 Spectrometer Frequency | 300.13            |
| 10 Spectral Width        | 6188.1            |
| 11 Lowest Frequency      | -1246.3           |
| 12 Nucleus               | <sup>1</sup> H    |
| 13 Acquired Size         | 32768             |
| 14 Spectral Size         | 65536             |

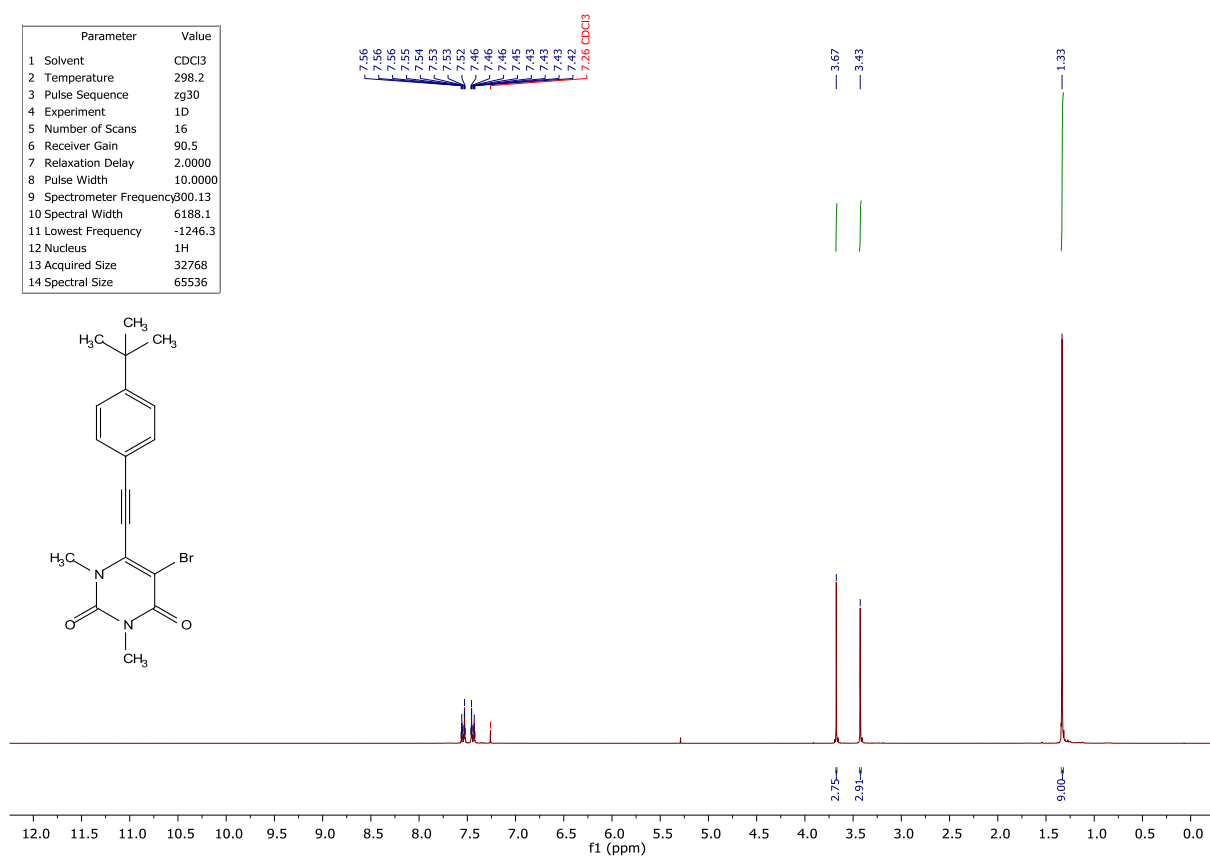

| Parameter                | Value             |
|--------------------------|-------------------|
| 1 Solvent                | CDCl <sub>3</sub> |
| 2 Temperature            | 298.2             |
| 3 Pulse Sequence         | zgpg30            |
| 4 Experiment             | 1D                |
| 5 Number of Scans        | 1024              |
| 6 Receiver Gain          | 2050.0            |
| 7 Relaxation Delay       | 2.0000            |
| 8 Pulse Width            | 10.0000           |
| 9 Spectrometer Frequency | 75.48             |
| 10 Spectral Width        | 18028.8           |
| 11 Lowest Frequency      | -1459.4           |
| 12 Nucleus               | <sup>13</sup> C   |
| 13 Acquired Size         | 32768             |
| 14 Spectral Size         | 65536             |

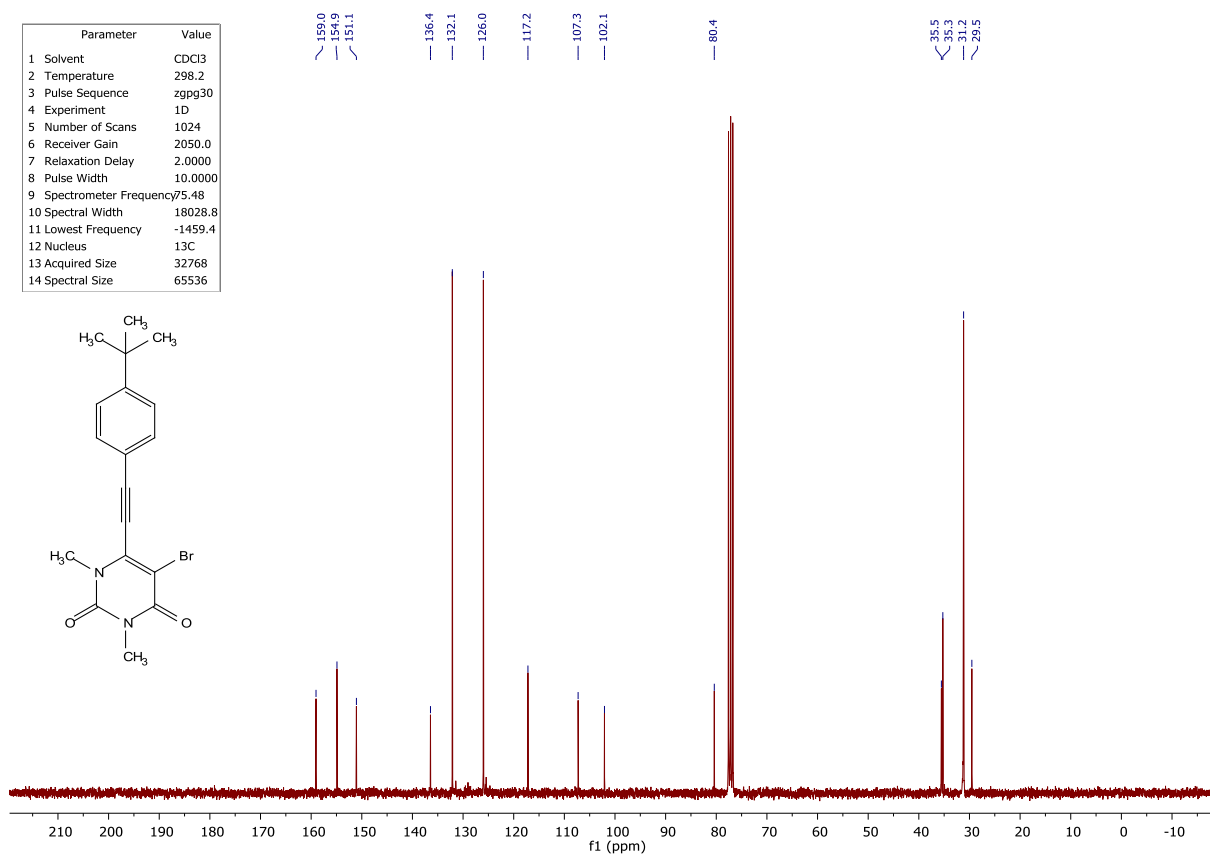

# 5-Bromo-1,3-dimethyl-6-[2-(4-trifluoromethylphenyl)ethynyl]uracil (3e)

| Parameter                | Value             |
|--------------------------|-------------------|
| 1 Solvent                | CDCl <sub>3</sub> |
| 2 Temperature            | 298.2             |
| 3 Pulse Sequence         | zg30              |
| 4 Experiment             | 1D                |
| 5 Number of Scans        | 16                |
| 6 Receiver Gain          | 456.0             |
| 7 Relaxation Delay       | 2.0000            |
| 8 Pulse Width            | 10.0000           |
| 9 Spectrometer Frequency | 800.13            |
| 10 Spectral Width        | 6188.1            |
| 11 Lowest Frequency      | -1246.4           |
| 12 Nucleus               | <sup>1</sup> H    |
| 13 Acquired Size         | 32768             |
| 14 Spectral Size         | 65536             |

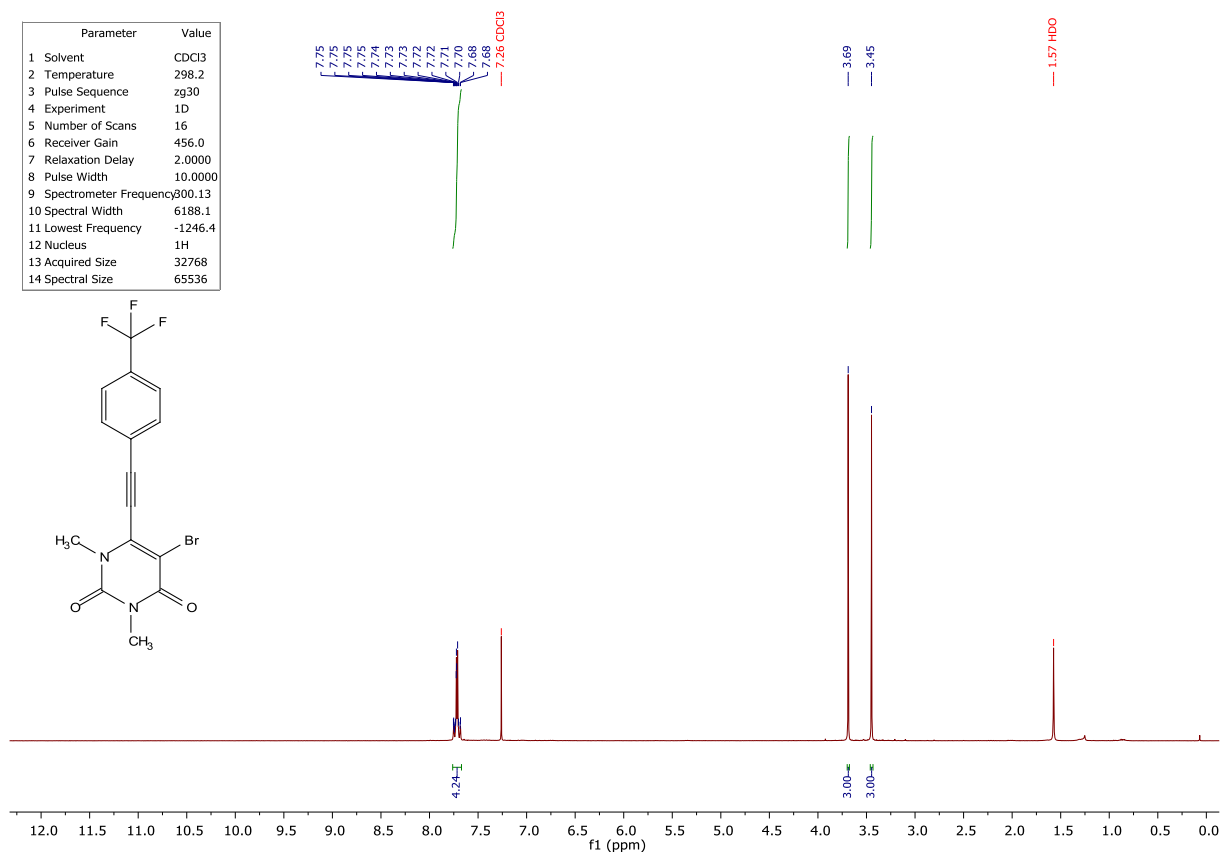

| Parameter                | Value             |
|--------------------------|-------------------|
| 1 Solvent                | CDCl <sub>3</sub> |
| 2 Temperature            | 298.2             |
| 3 Pulse Sequence         | zgfhgqn           |
| 4 Experiment             | 1D                |
| 5 Number of Scans        | 64                |
| 6 Receiver Gain          | 2050.0            |
| 7 Relaxation Delay       | 1.0000            |
| 8 Pulse Width            | 10.0000           |
| 9 Spectrometer Frequency | 282.38            |
| 10 Spectral Width        | 66964.3           |
| 11 Lowest Frequency      | -61722.4          |
| 12 Nucleus               | <sup>19</sup> F   |
| 13 Acquired Size         | 65536             |
| 14 Spectral Size         | 131072            |

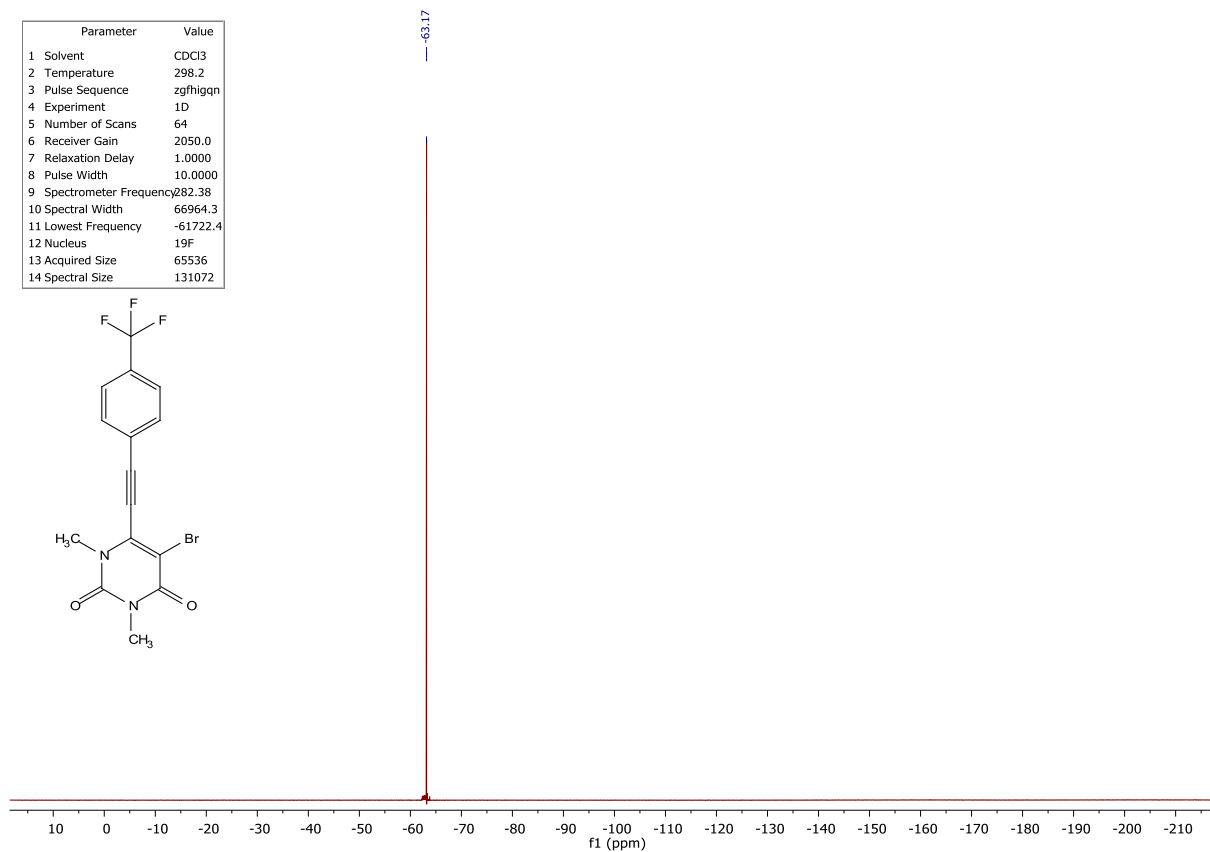

| Parameter                | Value             |
|--------------------------|-------------------|
| 1 Solvent                | CDCl <sub>3</sub> |
| 2 Temperature            | 298.1             |
| 3 Pulse Sequence         | zgpg30            |
| 4 Experiment             | 1D                |
| 5 Number of Scans        | 5120              |
| 6 Receiver Gain          | 101.0             |
| 7 Relaxation Delay       | 2.0000            |
| 8 Pulse Width            | 10.0000           |
| 9 Spectrometer Frequency | 125.77            |
| 10 Spectral Width        | 30120.5           |
| 11 Lowest Frequency      | -2468.1           |
| 12 Nucleus               | <sup>13</sup> C   |
| 13 Acquired Size         | 32768             |
| 14 Spectral Size         | 65536             |

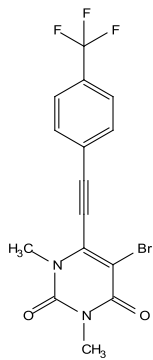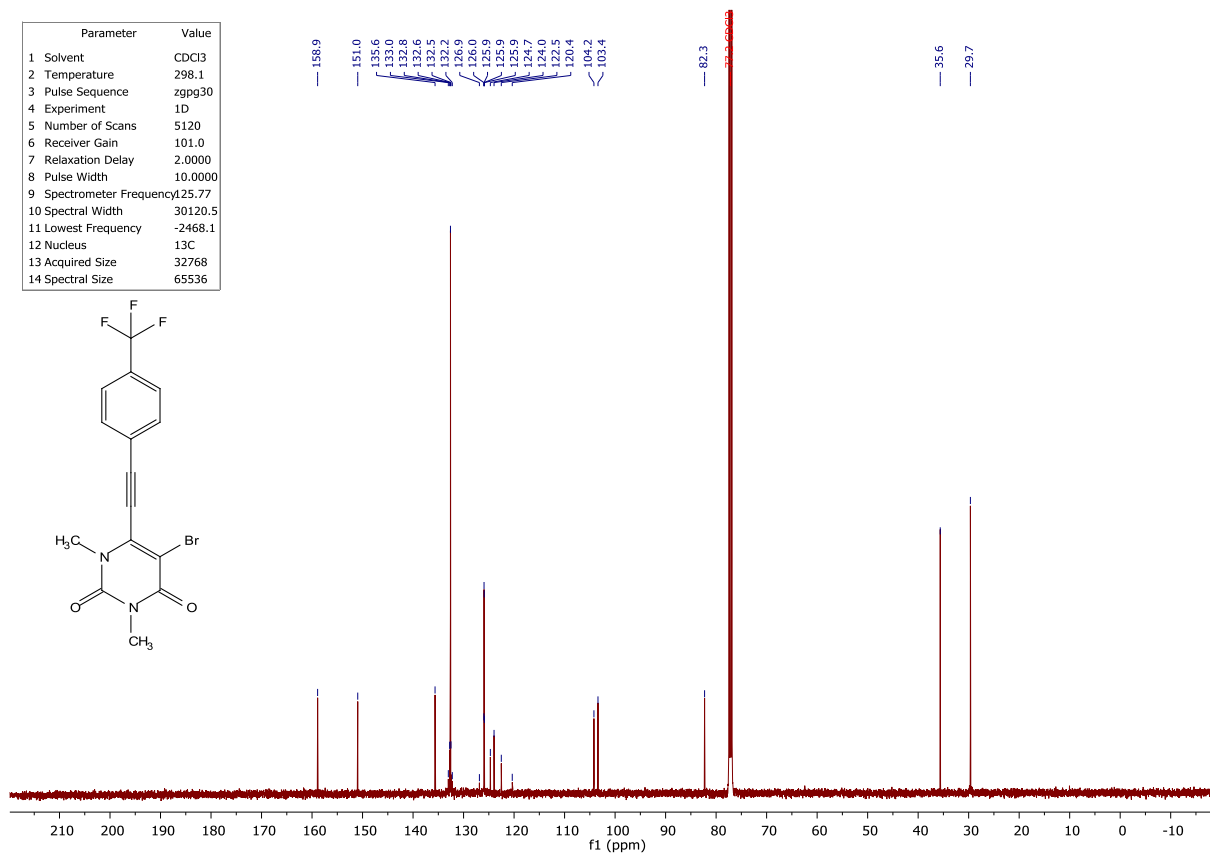

# 5-Bromo-1,3-dimethyl-6-[2-(4-methoxyphenyl)ethynyl]uracil (3f)

| Parameter                | Value             |
|--------------------------|-------------------|
| 1 Solvent                | CDCl <sub>3</sub> |
| 2 Temperature            | 298.7             |
| 3 Pulse Sequence         | zg30              |
| 4 Experiment             | 1D                |
| 5 Number of Scans        | 16                |
| 6 Receiver Gain          | 287.0             |
| 7 Relaxation Delay       | 2.0000            |
| 8 Pulse Width            | 10.0000           |
| 9 Spectrometer Frequency | 800.13            |
| 10 Spectral Width        | 6188.1            |
| 11 Lowest Frequency      | -1246.6           |
| 12 Nucleus               | <sup>1</sup> H    |
| 13 Acquired Size         | 32768             |
| 14 Spectral Size         | 65536             |

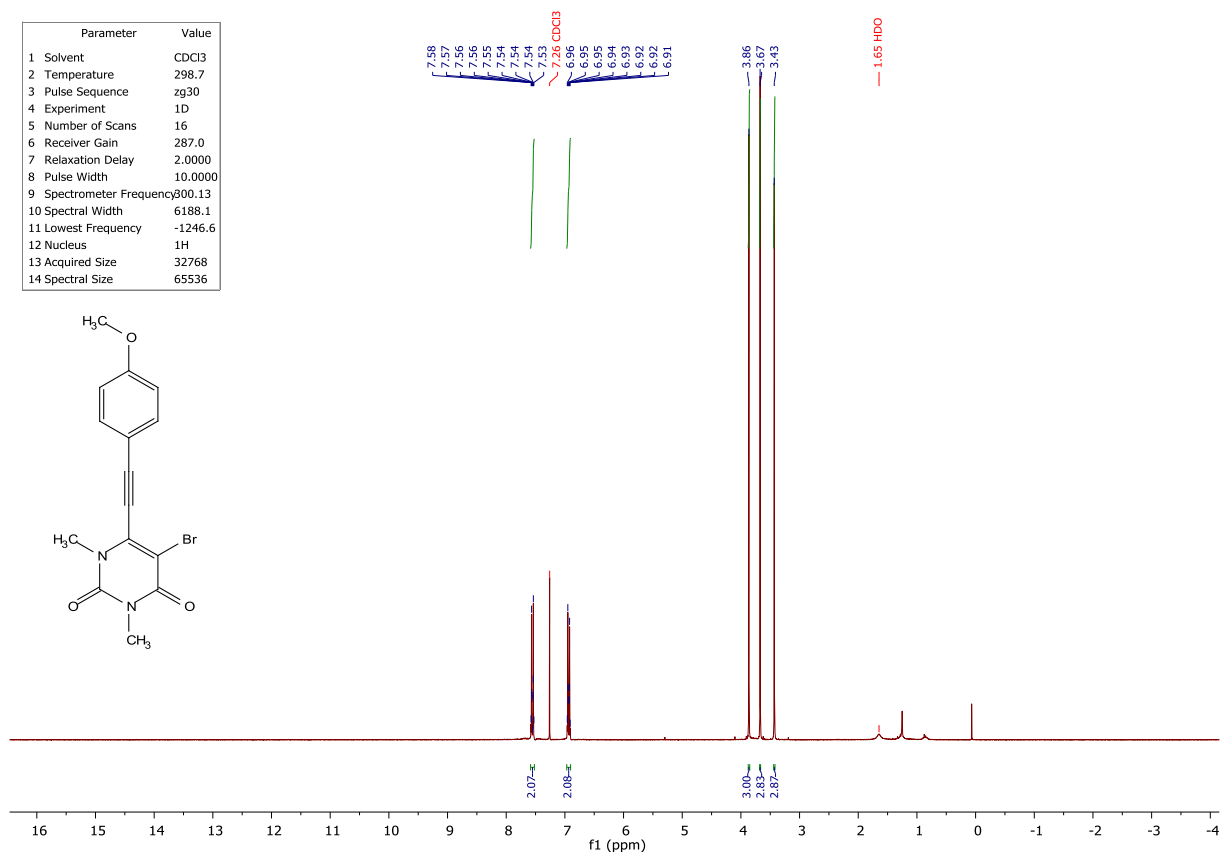

| Parameter                | Value             |
|--------------------------|-------------------|
| 1 Solvent                | CDCl <sub>3</sub> |
| 2 Temperature            | 299.3             |
| 3 Pulse Sequence         | zgpg30            |
| 4 Experiment             | 1D                |
| 5 Number of Scans        | 1024              |
| 6 Receiver Gain          | 2050.0            |
| 7 Relaxation Delay       | 2.0000            |
| 8 Pulse Width            | 10.0000           |
| 9 Spectrometer Frequency | 75.48             |
| 10 Spectral Width        | 18028.8           |
| 11 Lowest Frequency      | -1457.2           |
| 12 Nucleus               | <sup>13</sup> C   |
| 13 Acquired Size         | 32768             |
| 14 Spectral Size         | 65536             |

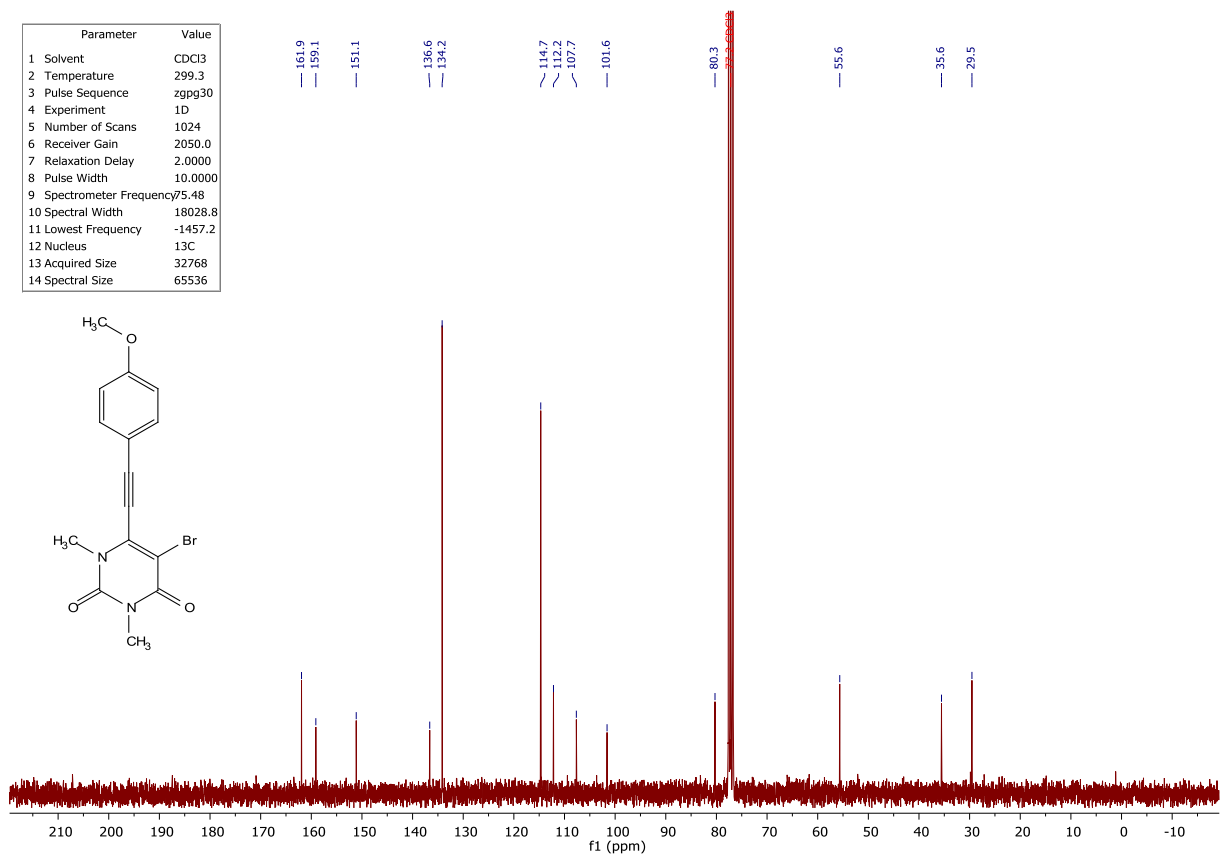

# 5-Bromo-1,3-dimethyl-6-[2-(thiophene)ethynyl]uracil (3h)

| Parameter                | Value             |
|--------------------------|-------------------|
| 1 Solvent                | CDCl <sub>3</sub> |
| 2 Temperature            | 298.2             |
| 3 Pulse Sequence         | zg30              |
| 4 Experiment             | 1D                |
| 5 Number of Scans        | 16                |
| 6 Receiver Gain          | 362.0             |
| 7 Relaxation Delay       | 2.0000            |
| 8 Pulse Width            | 10.0000           |
| 9 Spectrometer Frequency | 800.13            |
| 10 Spectral Width        | 6188.1            |
| 11 Lowest Frequency      | -1246.4           |
| 12 Nucleus               | <sup>1</sup> H    |
| 13 Acquired Size         | 32768             |
| 14 Spectral Size         | 65536             |

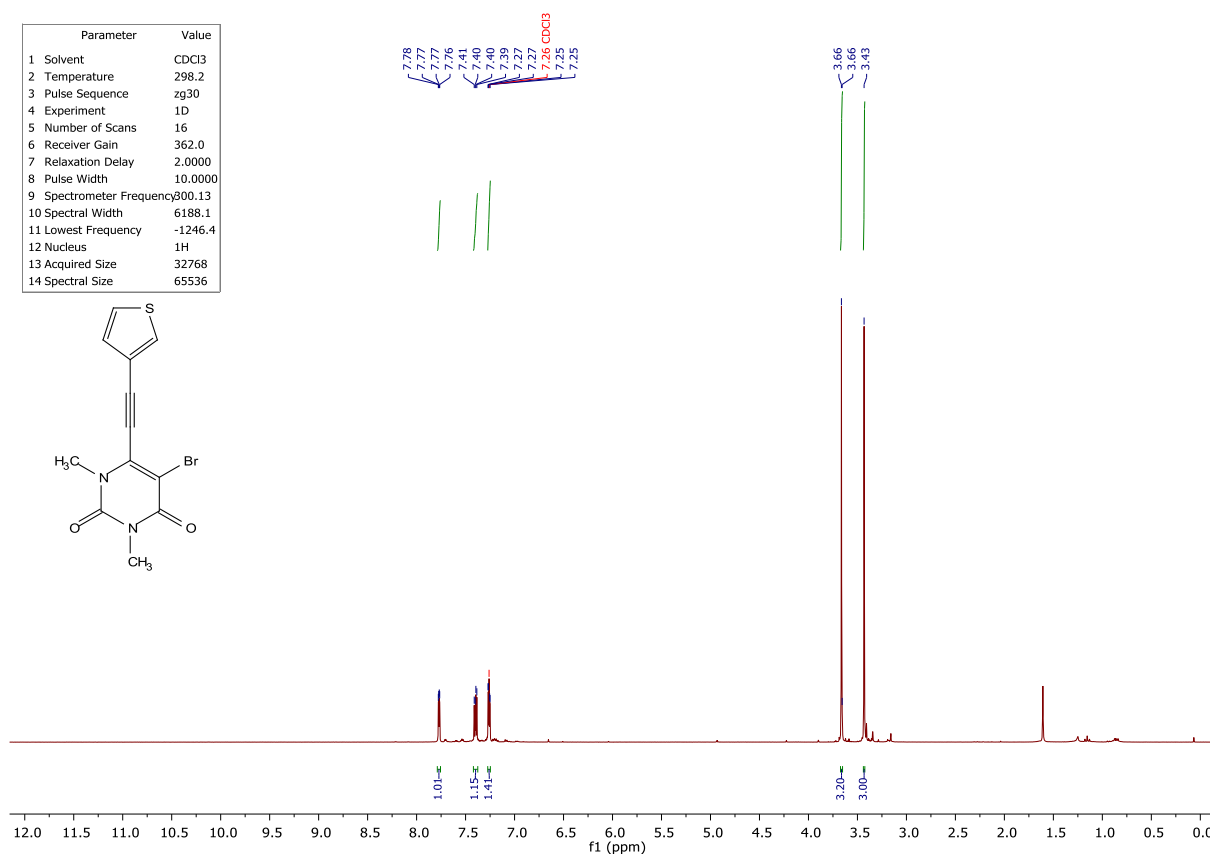

| Parameter                | Value             |
|--------------------------|-------------------|
| 1 Solvent                | CDCl <sub>3</sub> |
| 2 Temperature            | 298.9             |
| 3 Pulse Sequence         | zgpg30            |
| 4 Experiment             | 1D                |
| 5 Number of Scans        | 1024              |
| 6 Receiver Gain          | 2050.0            |
| 7 Relaxation Delay       | 2.0000            |
| 8 Pulse Width            | 10.0000           |
| 9 Spectrometer Frequency | 75.48             |
| 10 Spectral Width        | 18028.8           |
| 11 Lowest Frequency      | -1457.9           |
| 12 Nucleus               | <sup>13</sup> C   |
| 13 Acquired Size         | 32768             |
| 14 Spectral Size         | 65536             |

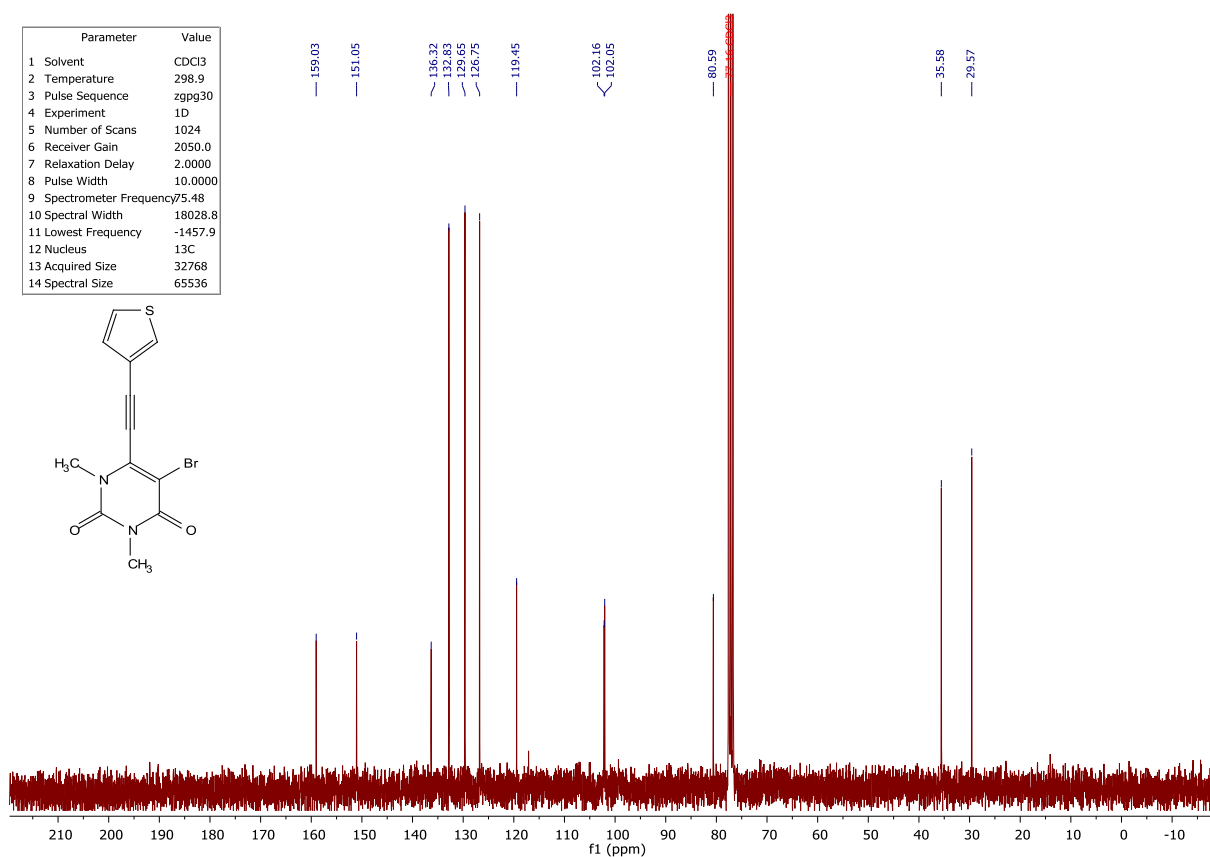

# 5-Bromo-1,3-dimethyl-6-[2-(4-dimethylamino)ethynyl]uracil (3i)

| Parameter                | Value             |
|--------------------------|-------------------|
| 1 Solvent                | CDCl <sub>3</sub> |
| 2 Temperature            | 298.2             |
| 3 Pulse Sequence         | zgpg30            |
| 4 Experiment             | 1D                |
| 5 Number of Scans        | 1024              |
| 6 Receiver Gain          | 101.0             |
| 7 Relaxation Delay       | 2.0000            |
| 8 Pulse Width            | 10.0000           |
| 9 Spectrometer Frequency | 125.77            |
| 10 Spectral Width        | 30120.5           |
| 11 Lowest Frequency      | -2472.3           |
| 12 Nucleus               | <sup>13</sup> C   |
| 13 Acquired Size         | 32768             |
| 14 Spectral Size         | 65536             |

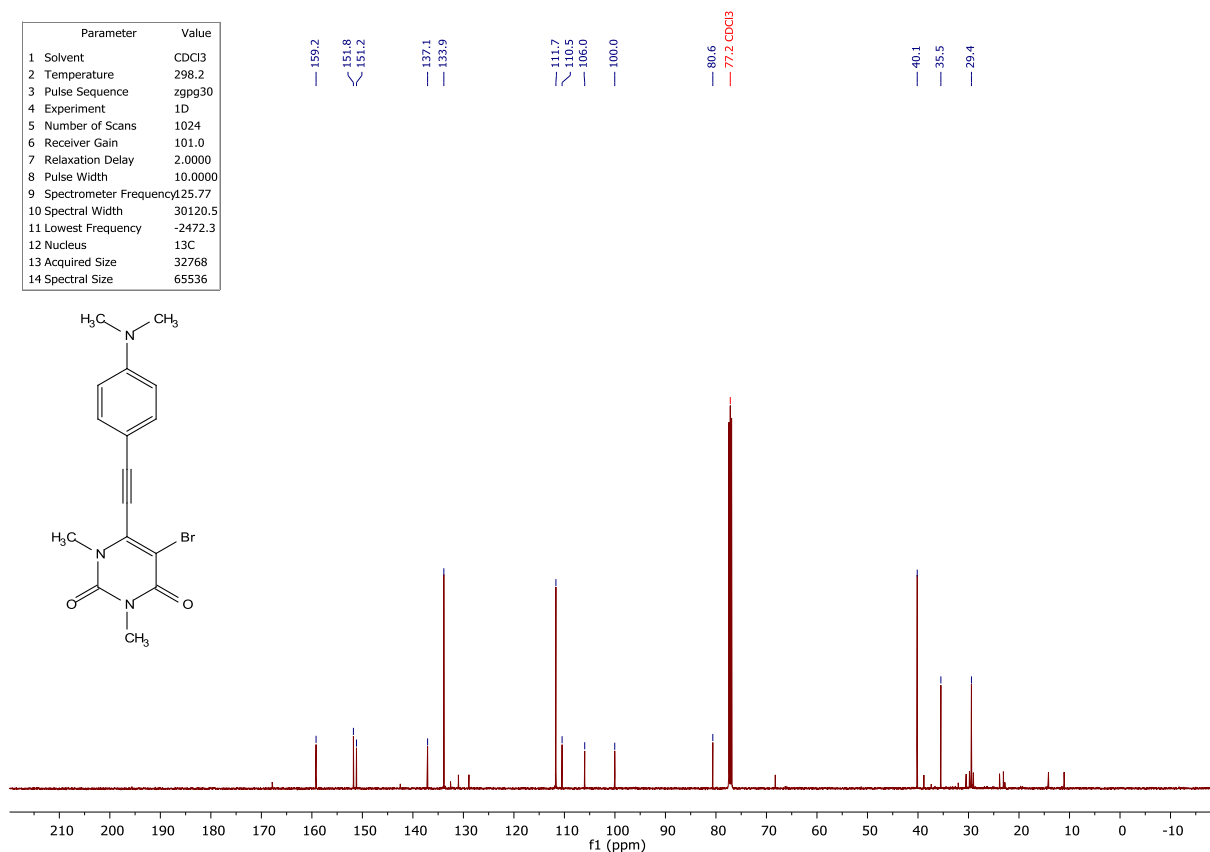

| Parameter                | Value             |
|--------------------------|-------------------|
| 1 Solvent                | CDCl <sub>3</sub> |
| 2 Temperature            | 298.1             |
| 3 Pulse Sequence         | zg30              |
| 4 Experiment             | 1D                |
| 5 Number of Scans        | 16                |
| 6 Receiver Gain          | 101.0             |
| 7 Relaxation Delay       | 1.0000            |
| 8 Pulse Width            | 8.0000            |
| 9 Spectrometer Frequency | 600.13            |
| 10 Spectral Width        | 10000.0           |
| 11 Lowest Frequency      | -1923.8           |
| 12 Nucleus               | <sup>1</sup> H    |
| 13 Acquired Size         | 32768             |
| 14 Spectral Size         | 65536             |

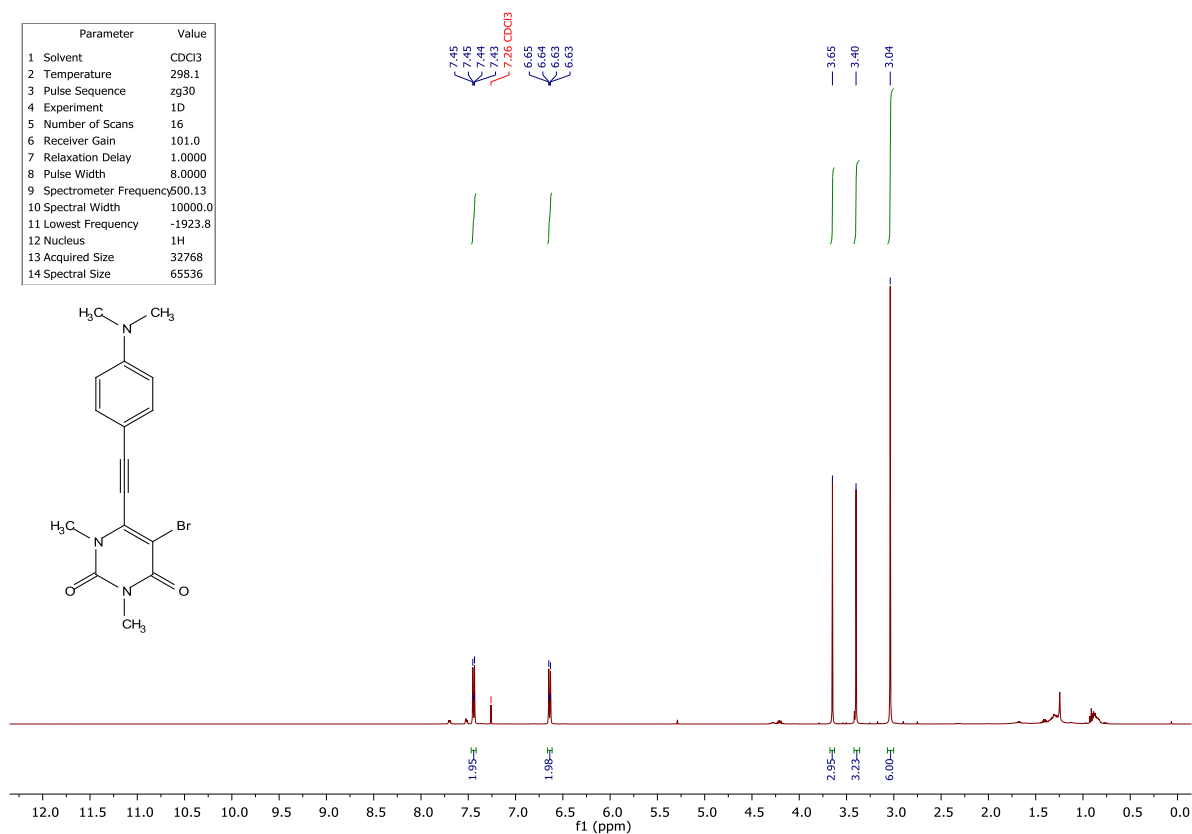

# 5-Bromo-1,3-dimethyl-6-[2-(biphenyl)ethynyl]uracil (3j)

| Parameter                | Value             |
|--------------------------|-------------------|
| 1 Solvent                | CDCl <sub>3</sub> |
| 2 Temperature            | 298.2             |
| 3 Pulse Sequence         | zg30              |
| 4 Experiment             | 1D                |
| 5 Number of Scans        | 16                |
| 6 Receiver Gain          | 144.0             |
| 7 Relaxation Delay       | 2.0000            |
| 8 Pulse Width            | 10.0000           |
| 9 Spectrometer Frequency | 800.13            |
| 10 Spectral Width        | 6188.1            |
| 11 Lowest Frequency      | -1246.3           |
| 12 Nucleus               | <sup>1</sup> H    |
| 13 Acquired Size         | 32768             |
| 14 Spectral Size         | 65536             |

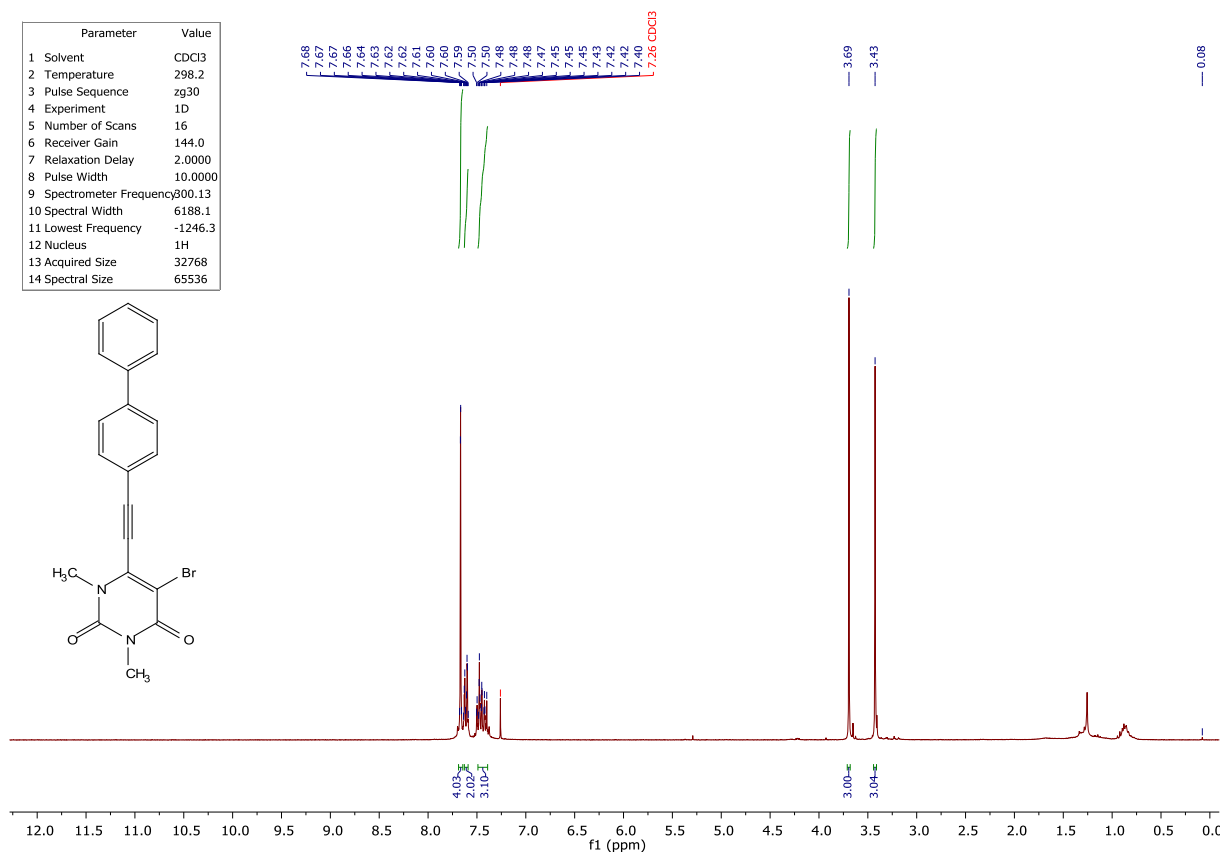

| Parameter                | Value             |
|--------------------------|-------------------|
| 1 Solvent                | CDCl <sub>3</sub> |
| 2 Temperature            | 298.2             |
| 3 Pulse Sequence         | zgpg30            |
| 4 Experiment             | 1D                |
| 5 Number of Scans        | 1024              |
| 6 Receiver Gain          | 2050.0            |
| 7 Relaxation Delay       | 2.0000            |
| 8 Pulse Width            | 10.0000           |
| 9 Spectrometer Frequency | 75.48             |
| 10 Spectral Width        | 18028.8           |
| 11 Lowest Frequency      | -1459.7           |
| 12 Nucleus               | <sup>13</sup> C   |
| 13 Acquired Size         | 32768             |
| 14 Spectral Size         | 65536             |

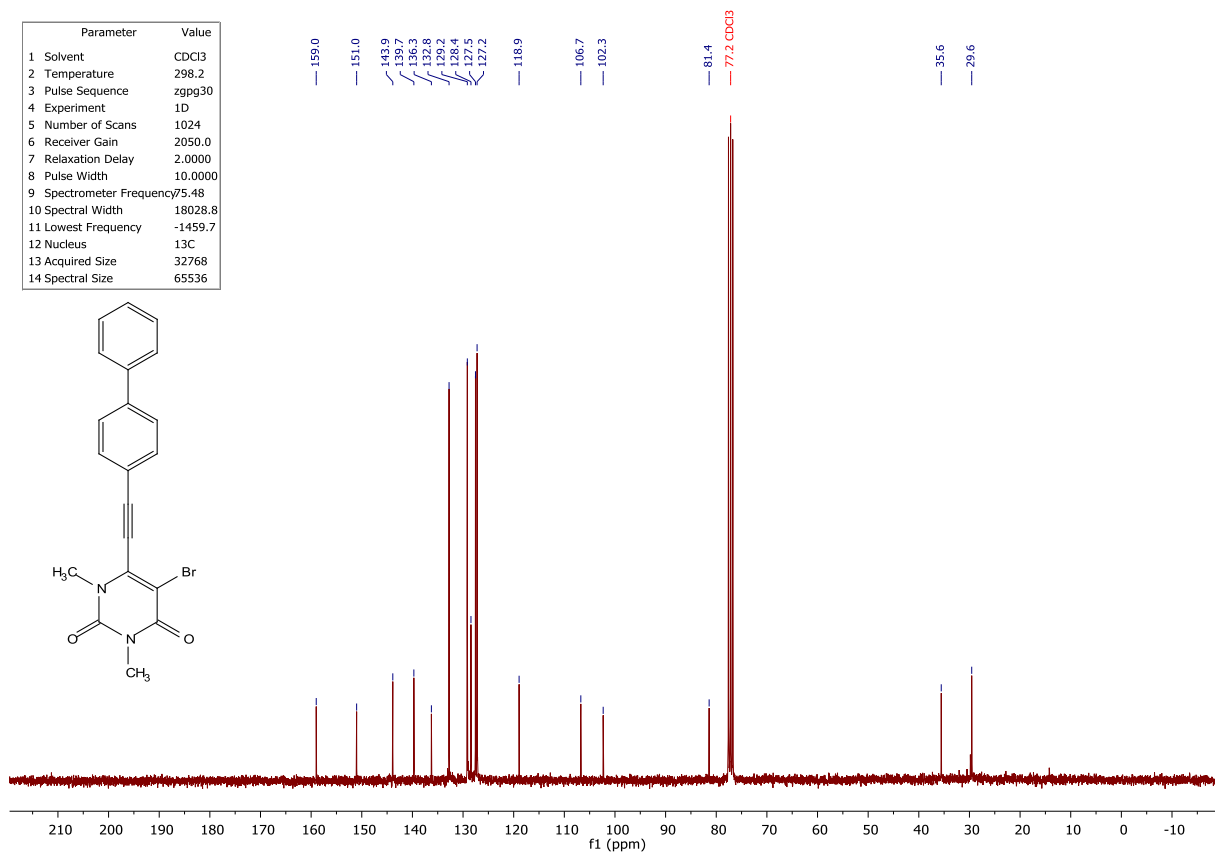

# 1,3-Dimethyl-5,6-[2-(4-methylphenyl)ethynyl]uracil (4a)

| Parameter                | Value          |
|--------------------------|----------------|
| 1 Solvent                | CDCl3          |
| 2 Temperature            | 298.2          |
| 3 Pulse Sequence         | zg30           |
| 4 Experiment             | 1D             |
| 5 Number of Scans        | 16             |
| 6 Receiver Gain          | 161.0          |
| 7 Relaxation Delay       | 2.0000         |
| 8 Pulse Width            | 10.0000        |
| 9 Spectrometer Frequency | 800.13         |
| 10 Spectral Width        | 6188.1         |
| 11 Lowest Frequency      | -1246.3        |
| 12 Nucleus               | <sup>1</sup> H |
| 13 Acquired Size         | 32768          |
| 14 Spectral Size         | 65536          |

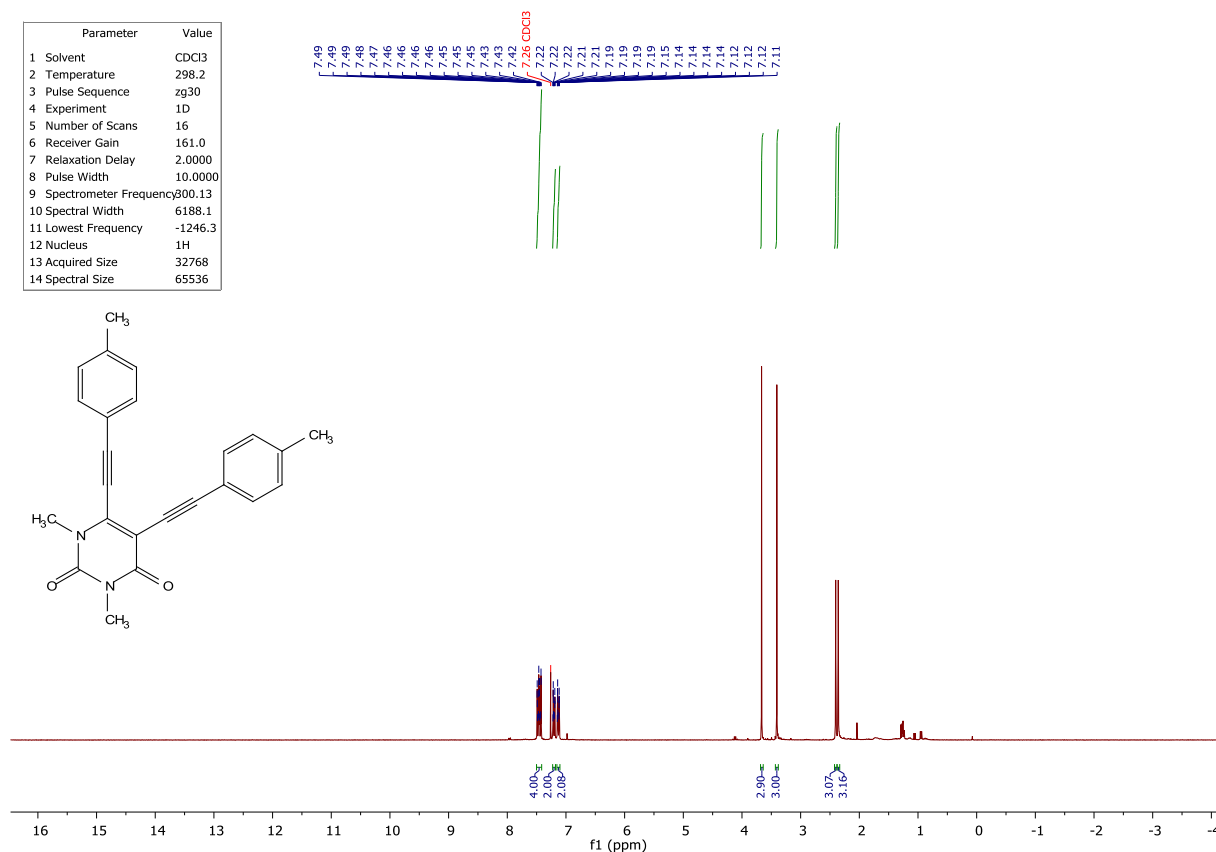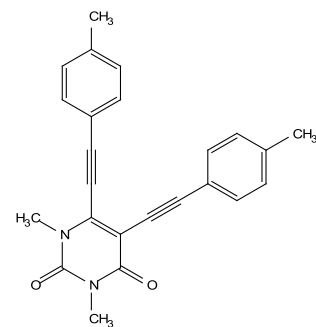

| Parameter                | Value           |
|--------------------------|-----------------|
| 1 Solvent                | CDCl3           |
| 2 Temperature            | 298.5           |
| 3 Pulse Sequence         | zgpg30          |
| 4 Experiment             | 1D              |
| 5 Number of Scans        | 1024            |
| 6 Receiver Gain          | 2050.0          |
| 7 Relaxation Delay       | 2.0000          |
| 8 Pulse Width            | 10.0000         |
| 9 Spectrometer Frequency | 75.48           |
| 10 Spectral Width        | 18028.8         |
| 11 Lowest Frequency      | -1457.4         |
| 12 Nucleus               | <sup>13</sup> C |
| 13 Acquired Size         | 32768           |
| 14 Spectral Size         | 65536           |

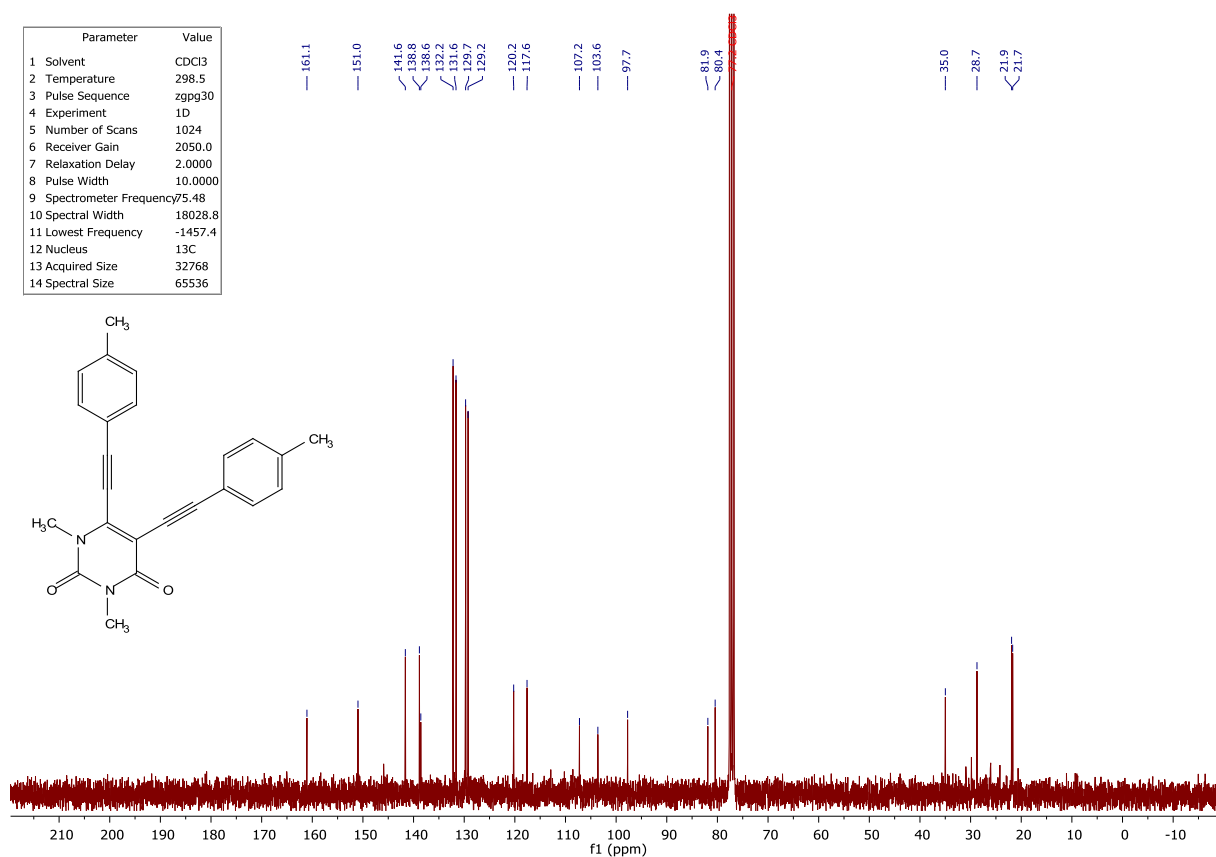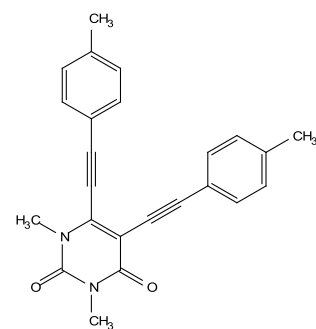



# 1,3-Dimethyl-5,6-[2-(4-*tert*-butylphenyl)ethynyl]uracil (4b)

| Parameter                | Value             |
|--------------------------|-------------------|
| 1 Solvent                | CDCl <sub>3</sub> |
| 2 Temperature            | 298.2             |
| 3 Pulse Sequence         | zg30              |
| 4 Experiment             | 1D                |
| 5 Number of Scans        | 16                |
| 6 Receiver Gain          | 90.5              |
| 7 Relaxation Delay       | 1.0000            |
| 8 Pulse Width            | 8.0000            |
| 9 Spectrometer Frequency | 500.13            |
| 10 Spectral Width        | 10000.0           |
| 11 Lowest Frequency      | -1924.7           |
| 12 Nucleus               | <sup>1</sup> H    |
| 13 Acquired Size         | 32768             |
| 14 Spectral Size         | 65536             |

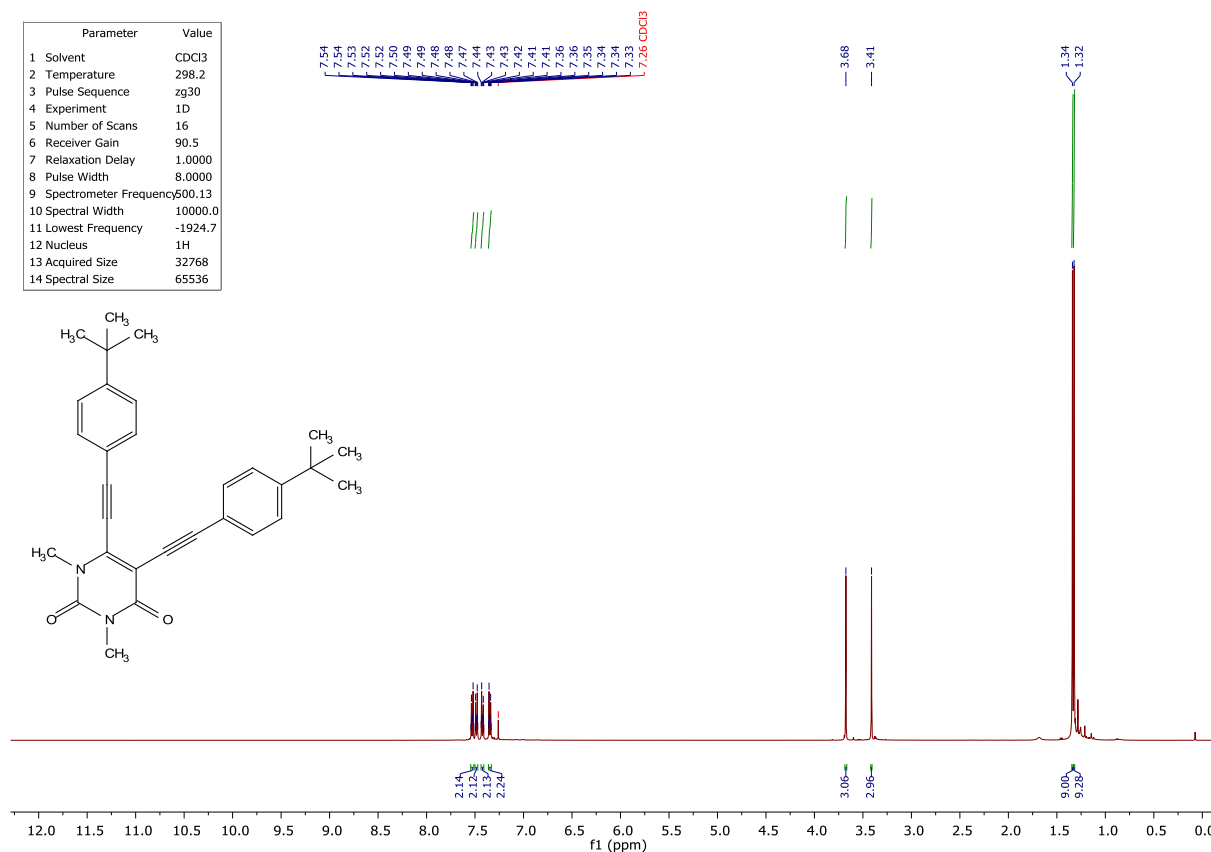

| Parameter                | Value             |
|--------------------------|-------------------|
| 1 Solvent                | CDCl <sub>3</sub> |
| 2 Temperature            | 298.1             |
| 3 Pulse Sequence         | zgpg30            |
| 4 Experiment             | 1D                |
| 5 Number of Scans        | 1024              |
| 6 Receiver Gain          | 101.0             |
| 7 Relaxation Delay       | 2.0000            |
| 8 Pulse Width            | 10.0000           |
| 9 Spectrometer Frequency | 125.77            |
| 10 Spectral Width        | 30120.5           |
| 11 Lowest Frequency      | -2471.0           |
| 12 Nucleus               | <sup>13</sup> C   |
| 13 Acquired Size         | 32768             |
| 14 Spectral Size         | 65536             |

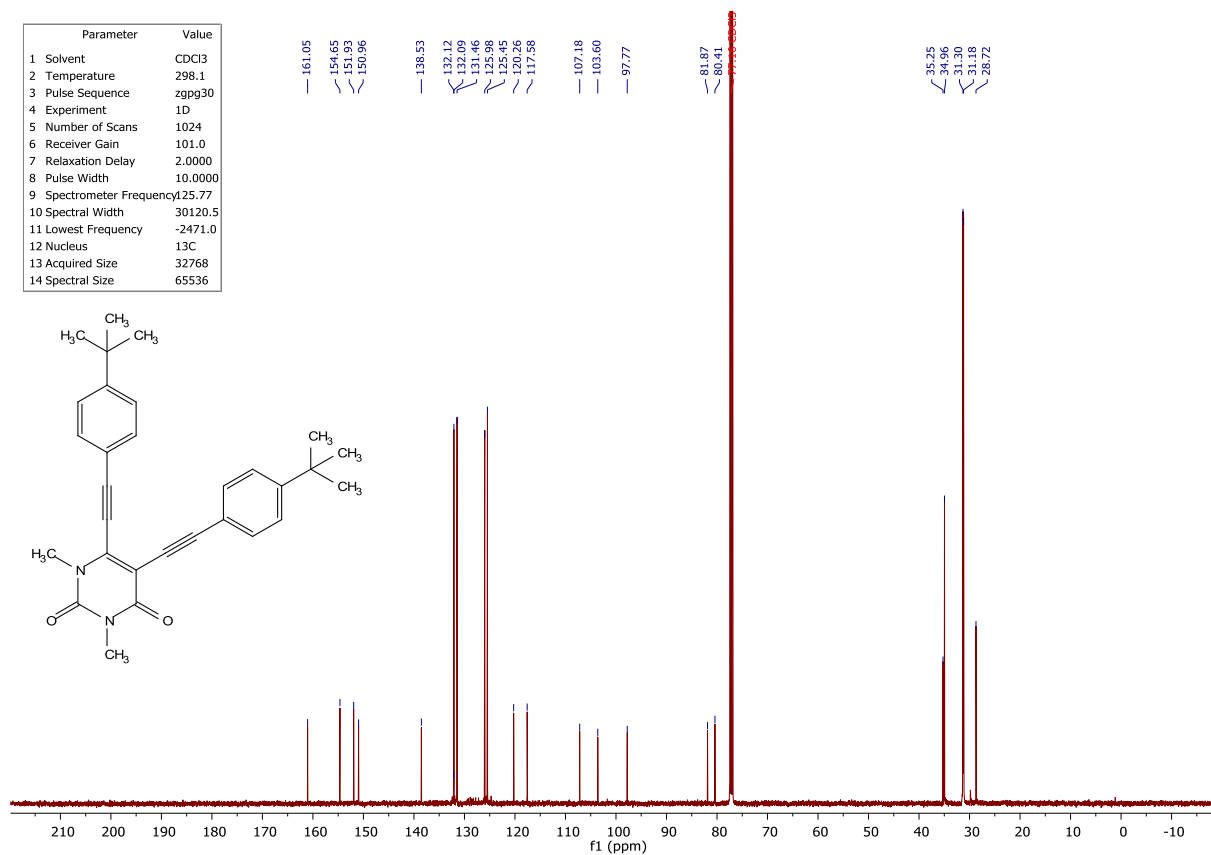

# 1,3-Dimethyl-5,6-[2-(phenyl)ethynyl]uracil (4c)

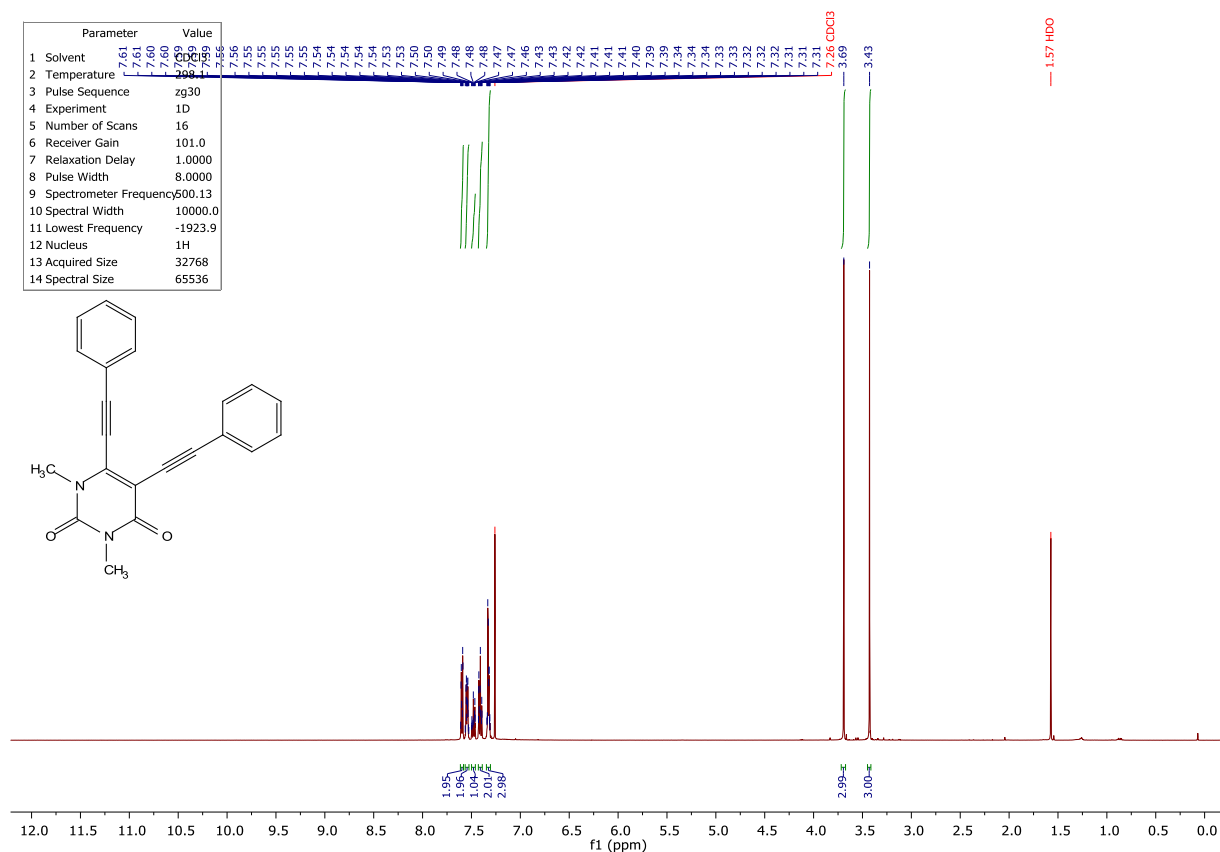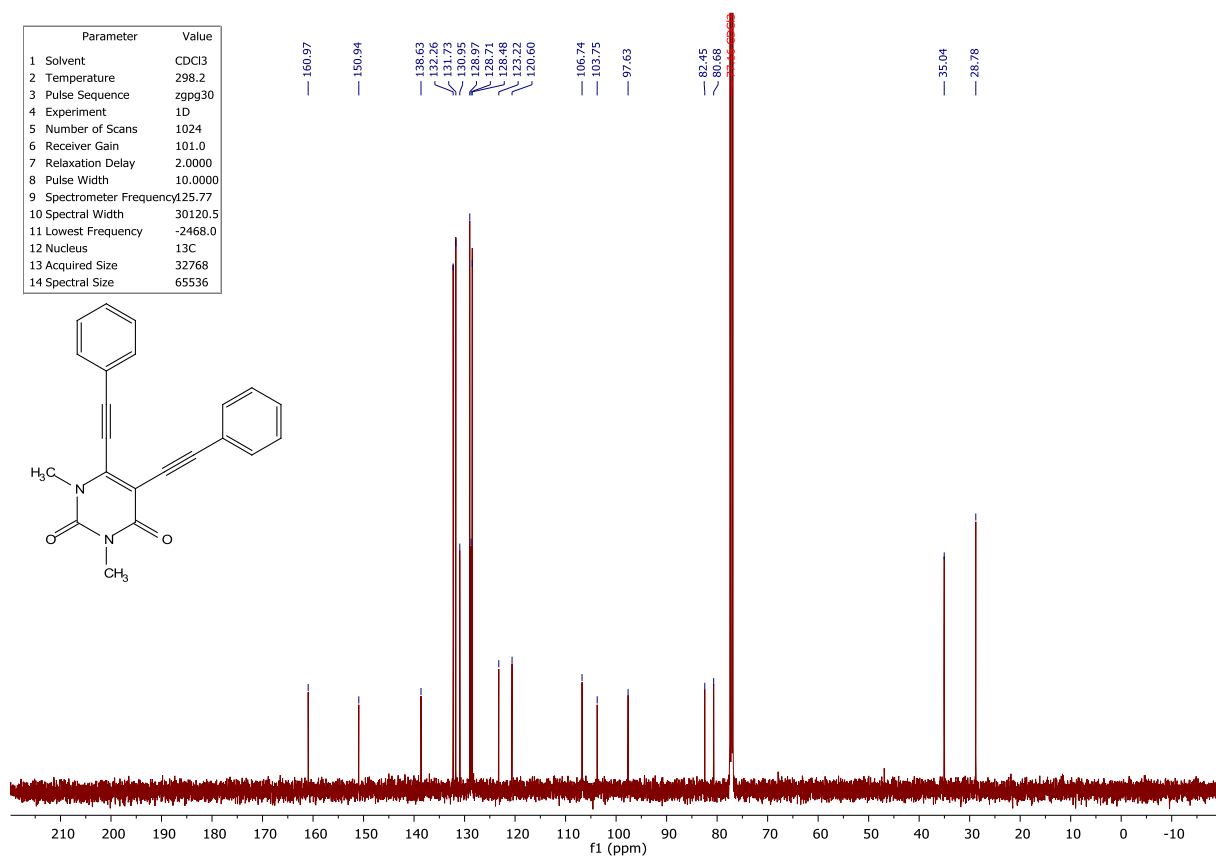

# 1,3-Dimethyl-5,6-[2-(4-methoxyphenyl)ethynyl]uracil (4d)

| Parameter                | Value             |
|--------------------------|-------------------|
| 1 Solvent                | CDCl <sub>3</sub> |
| 2 Temperature            | 298.2             |
| 3 Pulse Sequence         | zg30              |
| 4 Experiment             | 1D                |
| 5 Number of Scans        | 16                |
| 6 Receiver Gain          | 101.0             |
| 7 Relaxation Delay       | 1.0000            |
| 8 Pulse Width            | 8.0000            |
| 9 Spectrometer Frequency | 500.13            |
| 10 Spectral Width        | 10000.0           |
| 11 Lowest Frequency      | -1923.8           |
| 12 Nucleus               | <sup>1</sup> H    |
| 13 Acquired Size         | 32768             |
| 14 Spectral Size         | 65536             |

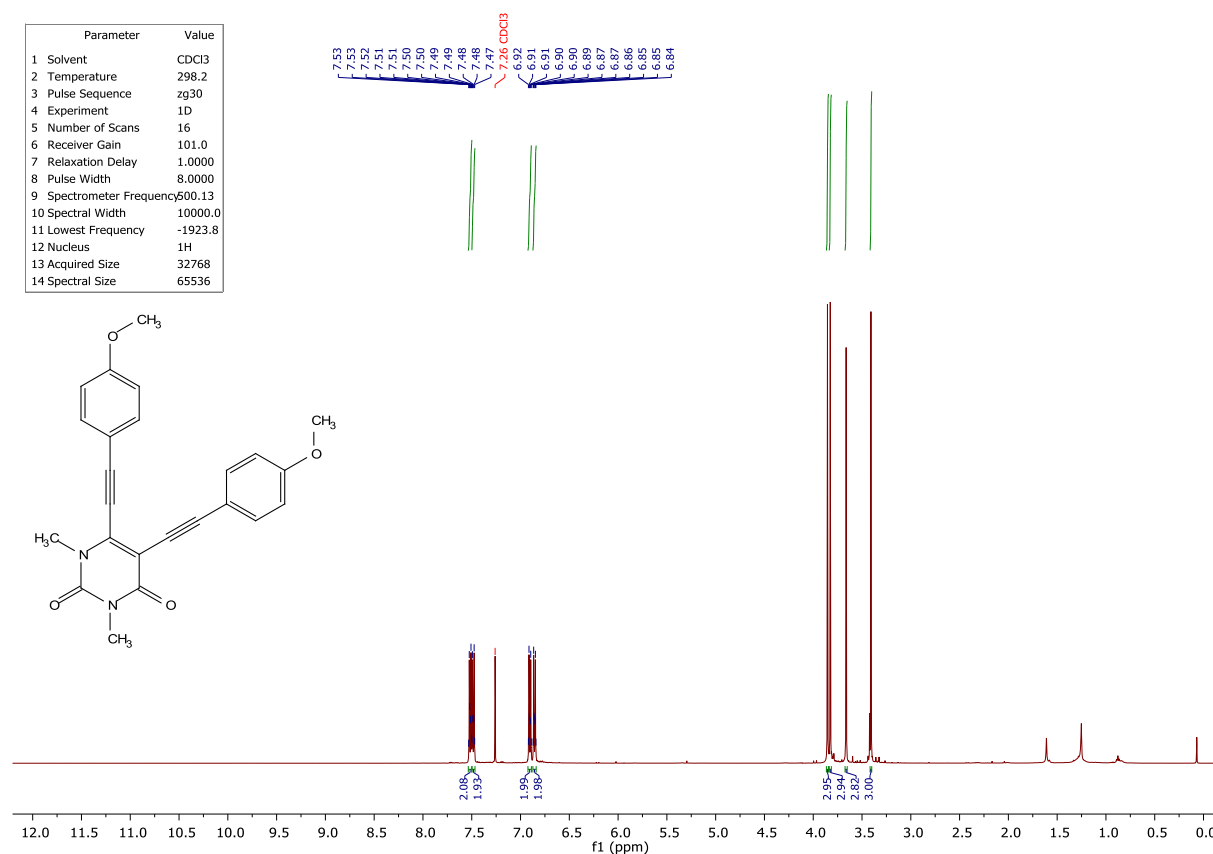

# 1,3-Dimethyl-5,6-[2-(4-dimethylaminophenyl)ethynyl]uracil (4e)

| Parameter                | Value             |
|--------------------------|-------------------|
| 1 Solvent                | CDCl <sub>3</sub> |
| 2 Temperature            | 298.2             |
| 3 Pulse Sequence         | zg30              |
| 4 Experiment             | 1D                |
| 5 Number of Scans        | 16                |
| 6 Receiver Gain          | 362.0             |
| 7 Relaxation Delay       | 1.0000            |
| 8 Pulse Width            | 10.0000           |
| 9 Spectrometer Frequency | 250.13            |
| 10 Spectral Width        | 5165.3            |
| 11 Lowest Frequency      | -1038.6           |
| 12 Nucleus               | <sup>1</sup> H    |
| 13 Acquired Size         | 32768             |
| 14 Spectral Size         | 65536             |

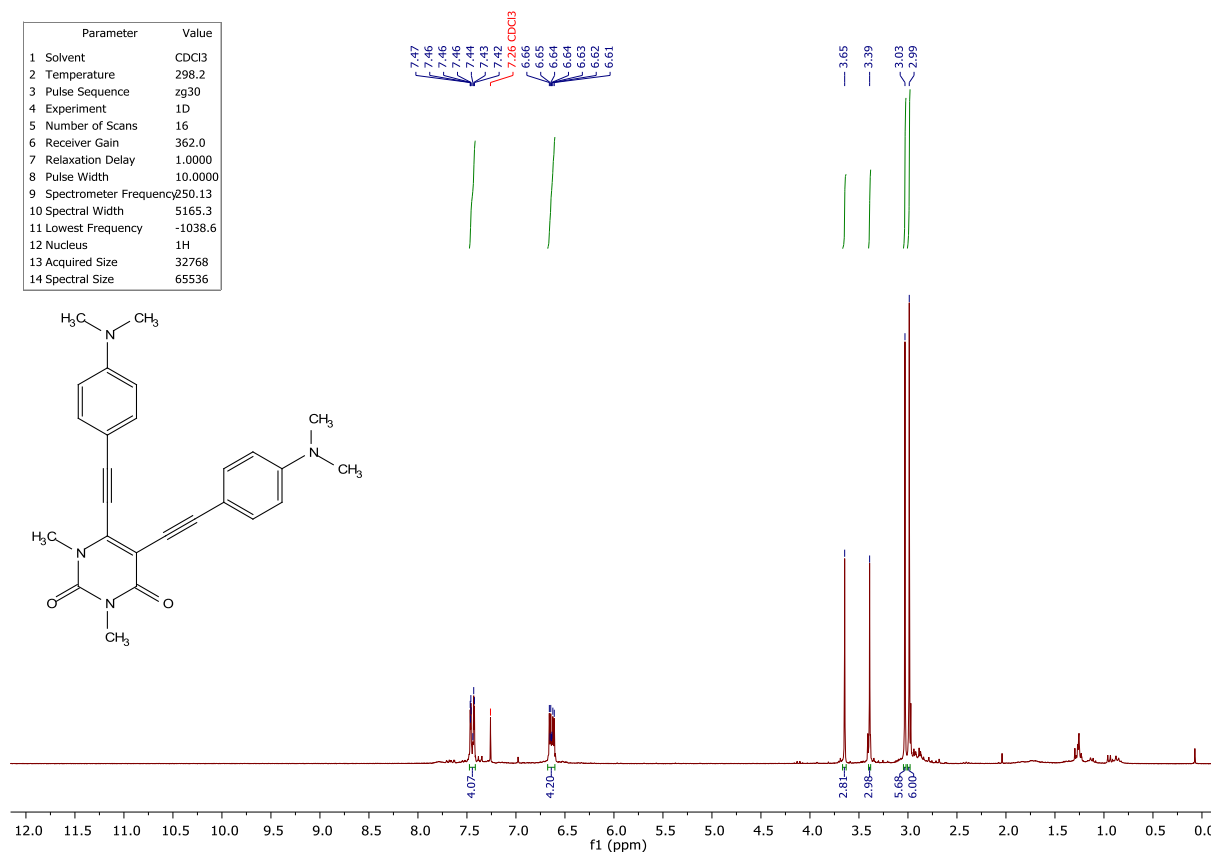

| Parameter                | Value             |
|--------------------------|-------------------|
| 1 Solvent                | CDCl <sub>3</sub> |
| 2 Temperature            | 298.1             |
| 3 Pulse Sequence         | zgpg30            |
| 4 Experiment             | 1D                |
| 5 Number of Scans        | 1024              |
| 6 Receiver Gain          | 2050.0            |
| 7 Relaxation Delay       | 2.0000            |
| 8 Pulse Width            | 10.0000           |
| 9 Spectrometer Frequency | 62.90             |
| 10 Spectral Width        | 15000.0           |
| 11 Lowest Frequency      | -1202.8           |
| 12 Nucleus               | <sup>13</sup> C   |
| 13 Acquired Size         | 32768             |
| 14 Spectral Size         | 65536             |

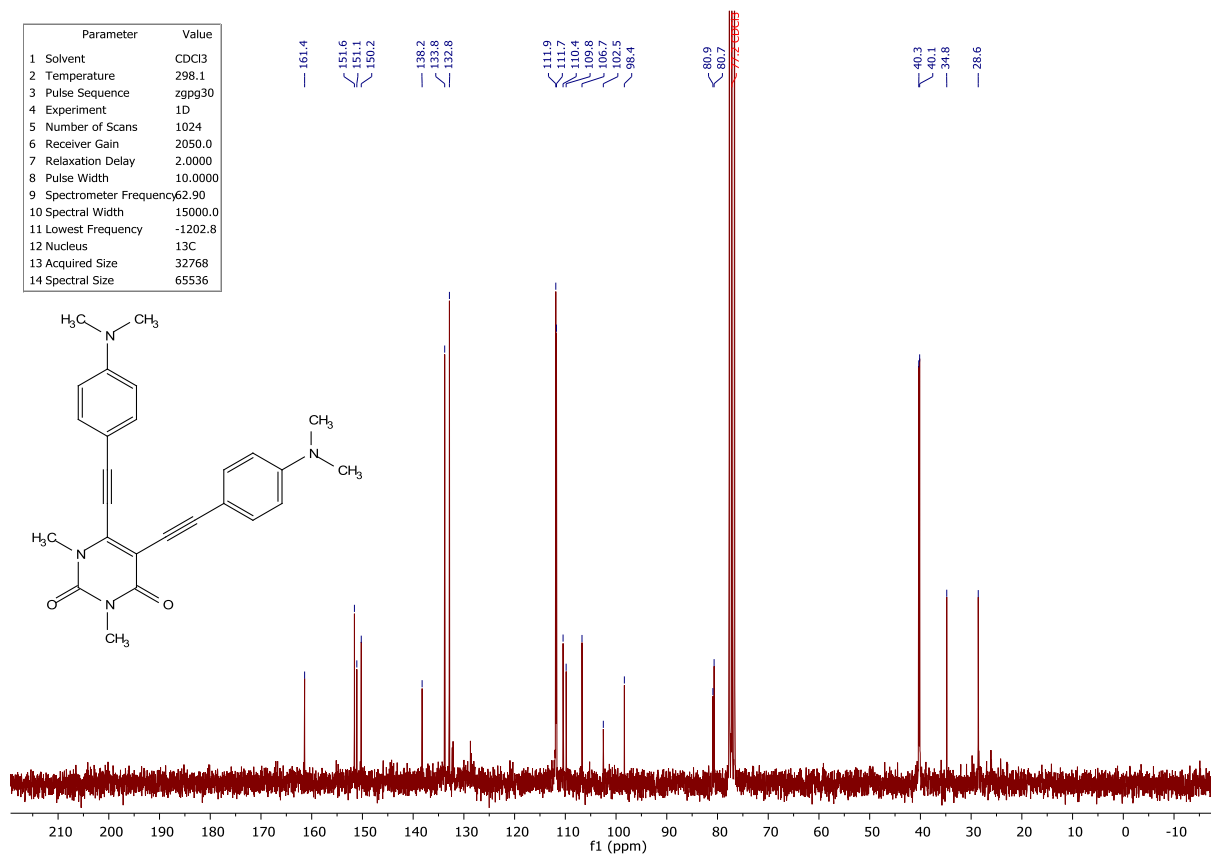

# 1,3-Dimethyl-5-[2-(4-fluorophenyl)ethynyl]-6-[2-(4-methylphenyl)-ethynyl]uracil (4h)

| Parameter                | Value          |
|--------------------------|----------------|
| 1 Solvent                | CDCl3          |
| 2 Temperature            | 298.1          |
| 3 Pulse Sequence         | zg30           |
| 4 Experiment             | 1D             |
| 5 Number of Scans        | 16             |
| 6 Receiver Gain          | 101.0          |
| 7 Relaxation Delay       | 1.0000         |
| 8 Pulse Width            | 8.0000         |
| 9 Spectrometer Frequency | 500.13         |
| 10 Spectral Width        | 10000.0        |
| 11 Lowest Frequency      | -1924.2        |
| 12 Nucleus               | <sup>1</sup> H |
| 13 Acquired Size         | 32768          |
| 14 Spectral Size         | 65536          |

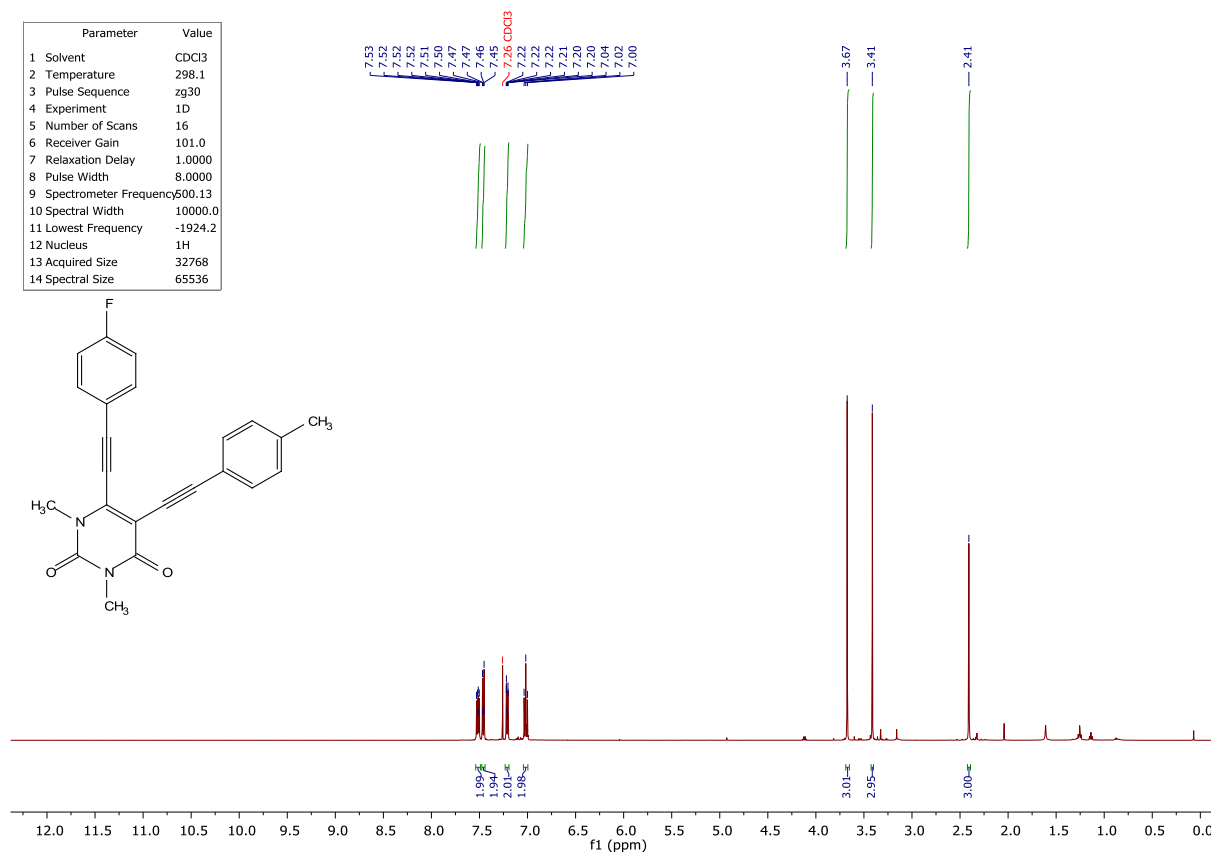

| Parameter                | Value           |
|--------------------------|-----------------|
| 1 Solvent                | CDCl3           |
| 2 Temperature            | 298.2           |
| 3 Pulse Sequence         | zgfhgqn         |
| 4 Experiment             | 1D              |
| 5 Number of Scans        | 64              |
| 6 Receiver Gain          | 2050.0          |
| 7 Relaxation Delay       | 1.0000          |
| 8 Pulse Width            | 10.0000         |
| 9 Spectrometer Frequency | 282.38          |
| 10 Spectral Width        | 66964.3         |
| 11 Lowest Frequency      | -61722.4        |
| 12 Nucleus               | <sup>19</sup> F |
| 13 Acquired Size         | 65536           |
| 14 Spectral Size         | 131072          |

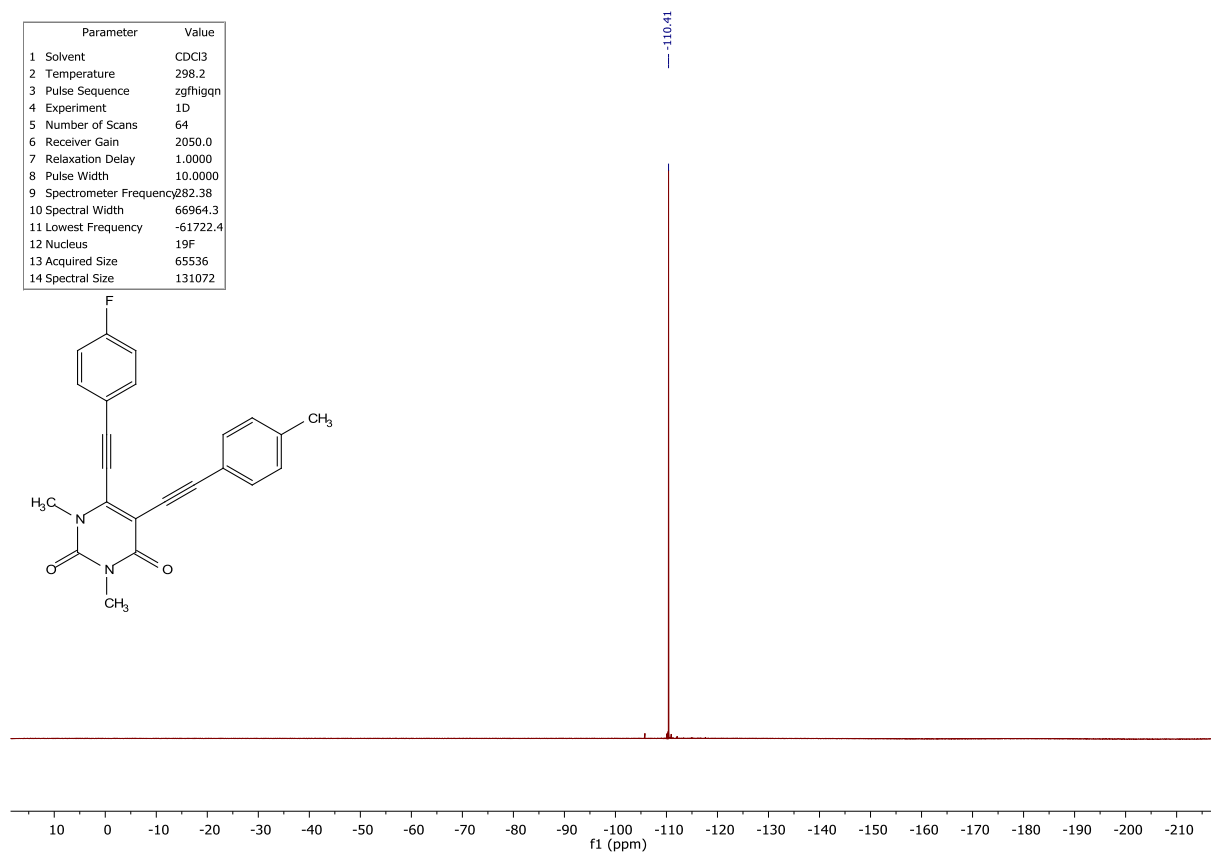

| Parameter                | Value           |
|--------------------------|-----------------|
| 1 Solvent                | CDCl3           |
| 2 Temperature            | 298.2           |
| 3 Pulse Sequence         | zgpg30          |
| 4 Experiment             | 1D              |
| 5 Number of Scans        | 1024            |
| 6 Receiver Gain          | 101.0           |
| 7 Relaxation Delay       | 2.0000          |
| 8 Pulse Width            | 10.0000         |
| 9 Spectrometer Frequency | 125.77          |
| 10 Spectral Width        | 30120.5         |
| 11 Lowest Frequency      | -2468.7         |
| 12 Nucleus               | <sup>13</sup> C |
| 13 Acquired Size         | 32768           |
| 14 Spectral Size         | 65536           |

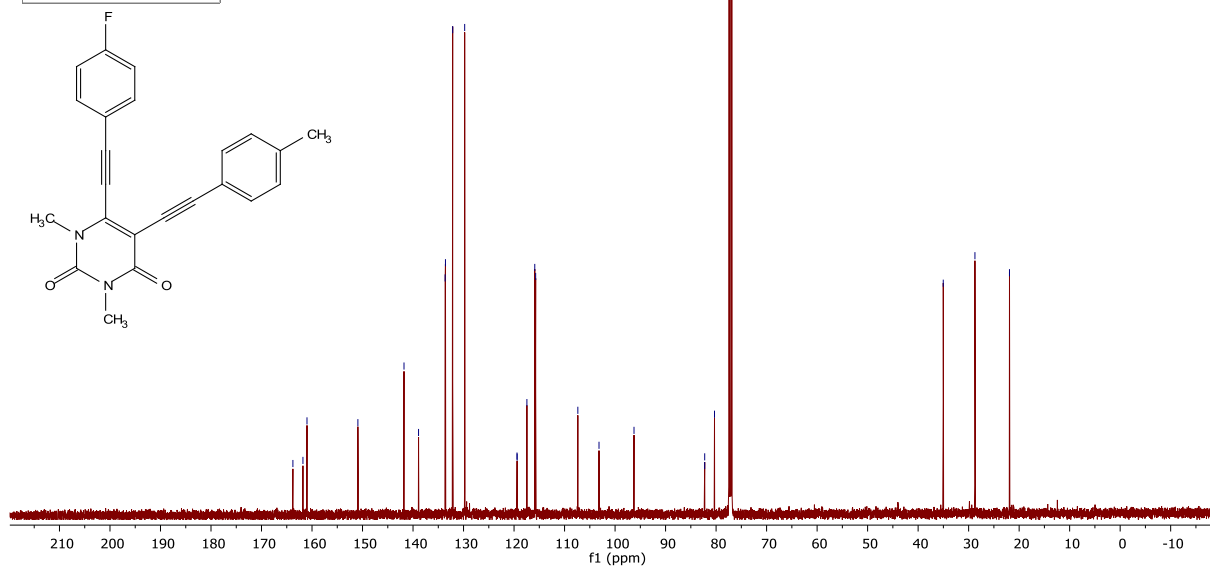

# 1,3-Dimethyl-5-(4-methylphenyl)-6-[2-(4-methylphenyl)ethynyl]uracil (5a)

| Parameter                | Value             |
|--------------------------|-------------------|
| 1 Solvent                | CDCl <sub>3</sub> |
| 2 Temperature            | 298.2             |
| 3 Pulse Sequence         | zg30              |
| 4 Experiment             | 1D                |
| 5 Number of Scans        | 16                |
| 6 Receiver Gain          | 161.0             |
| 7 Relaxation Delay       | 2.0000            |
| 8 Pulse Width            | 10.0000           |
| 9 Spectrometer Frequency | 300.13            |
| 10 Spectral Width        | 6188.1            |
| 11 Lowest Frequency      | -1246.6           |
| 12 Nucleus               | <sup>1</sup> H    |
| 13 Acquired Size         | 32768             |
| 14 Spectral Size         | 65536             |

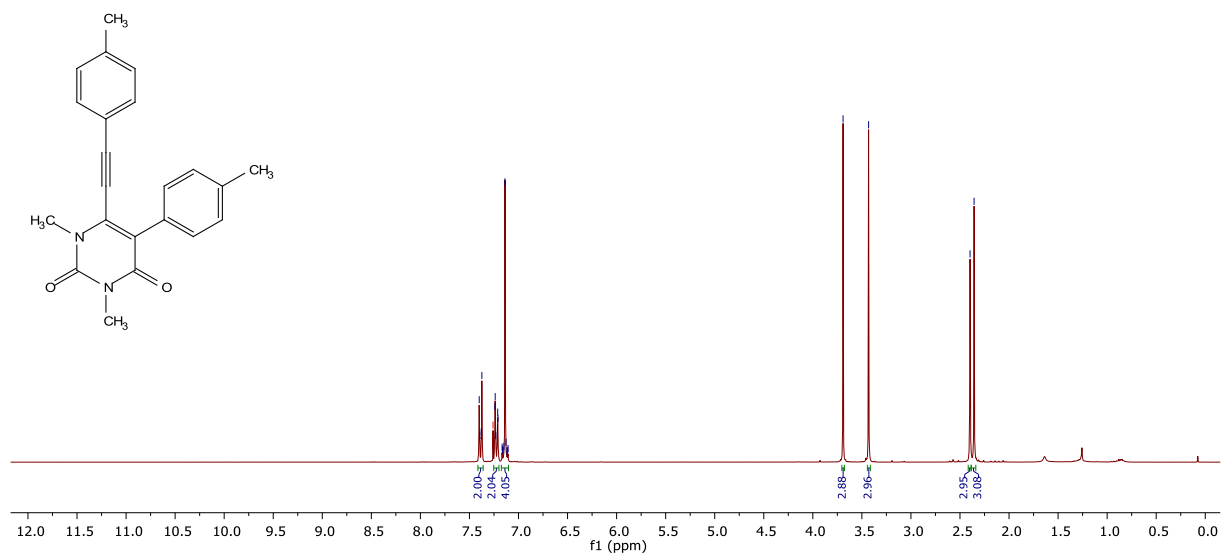

| Parameter                | Value             |
|--------------------------|-------------------|
| 1 Solvent                | CDCl <sub>3</sub> |
| 2 Temperature            | 298.8             |
| 3 Pulse Sequence         | zgpg30            |
| 4 Experiment             | 1D                |
| 5 Number of Scans        | 1024              |
| 6 Receiver Gain          | 2050.0            |
| 7 Relaxation Delay       | 2.0000            |
| 8 Pulse Width            | 10.0000           |
| 9 Spectrometer Frequency | 75.48             |
| 10 Spectral Width        | 18028.8           |
| 11 Lowest Frequency      | -1459.2           |
| 12 Nucleus               | <sup>13</sup> C   |
| 13 Acquired Size         | 32768             |
| 14 Spectral Size         | 65536             |

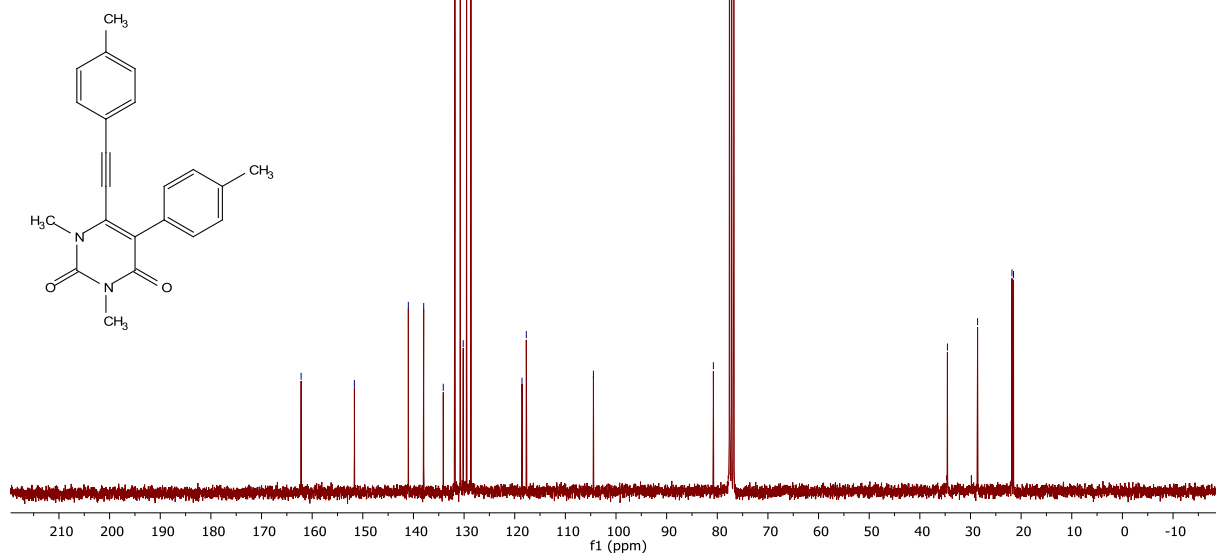

# 1,3-Dimethyl-5-(4-dimethylaminophenyl)-6-[2-phenylethynyl]uracil (5b)

| Parameter                | Value             |
|--------------------------|-------------------|
| 1 Solvent                | CDCl <sub>3</sub> |
| 2 Temperature            | 298.2             |
| 3 Pulse Sequence         | zg30              |
| 4 Experiment             | 1D                |
| 5 Number of Scans        | 16                |
| 6 Receiver Gain          | 101.0             |
| 7 Relaxation Delay       | 1.0000            |
| 8 Pulse Width            | 8.0000            |
| 9 Spectrometer Frequency | 500.13            |
| 10 Spectral Width        | 10000.0           |
| 11 Lowest Frequency      | -1923.6           |
| 12 Nucleus               | <sup>1</sup> H    |
| 13 Acquired Size         | 32768             |
| 14 Spectral Size         | 65536             |

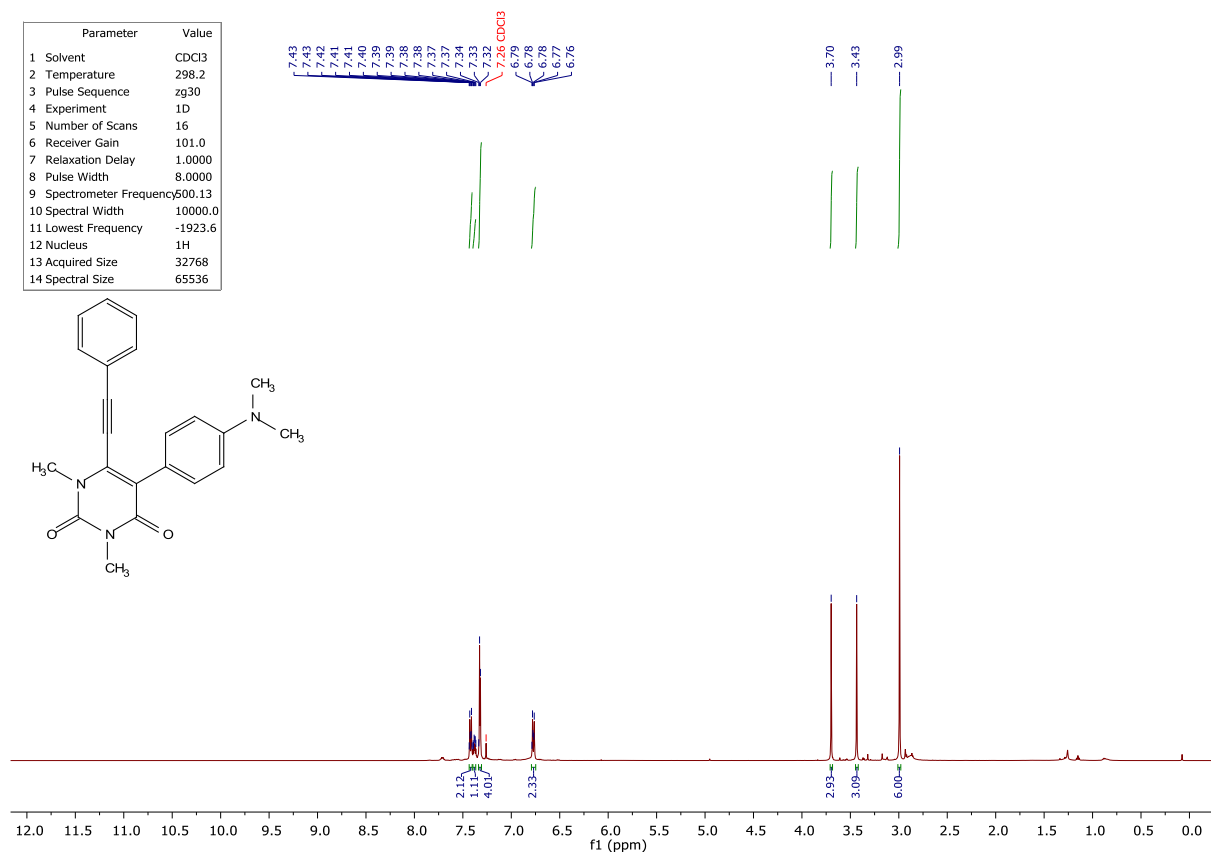

| Parameter                | Value             |
|--------------------------|-------------------|
| 1 Solvent                | CDCl <sub>3</sub> |
| 2 Temperature            | 298.1             |
| 3 Pulse Sequence         | zgpg30            |
| 4 Experiment             | 1D                |
| 5 Number of Scans        | 1024              |
| 6 Receiver Gain          | 101.0             |
| 7 Relaxation Delay       | 2.0000            |
| 8 Pulse Width            | 10.0000           |
| 9 Spectrometer Frequency | 125.77            |
| 10 Spectral Width        | 30120.5           |
| 11 Lowest Frequency      | -2472.9           |
| 12 Nucleus               | <sup>13</sup> C   |
| 13 Acquired Size         | 32768             |
| 14 Spectral Size         | 65536             |

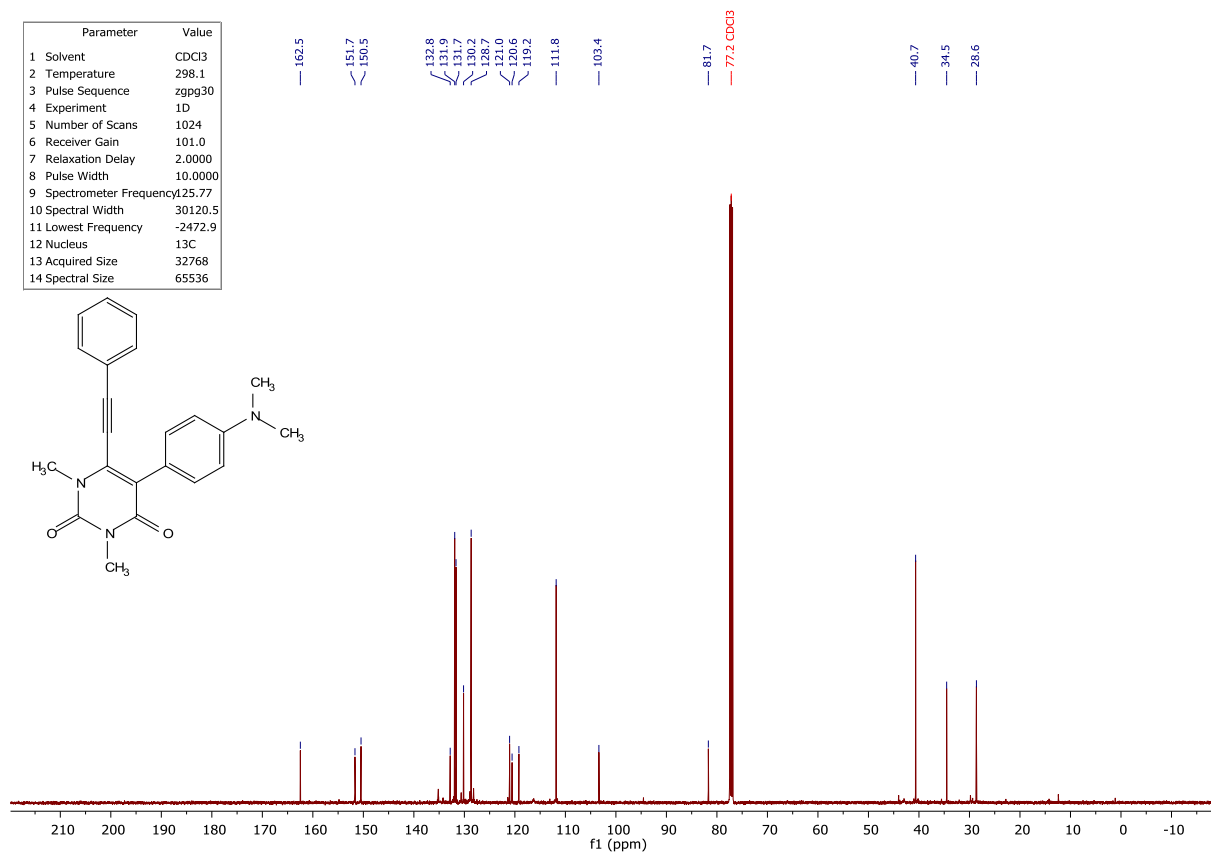



# 1,3-Dimethyl-5-(4-trifluoromethylphenyl)-6-[2-phenylethynyl]uracil (5c)

| Parameter                | Value             |
|--------------------------|-------------------|
| 1 Solvent                | CDCl <sub>3</sub> |
| 2 Temperature            | 298.2             |
| 3 Pulse Sequence         | zg30              |
| 4 Experiment             | 1D                |
| 5 Number of Scans        | 16                |
| 6 Receiver Gain          | 101.0             |
| 7 Relaxation Delay       | 1.0000            |
| 8 Pulse Width            | 8.0000            |
| 9 Spectrometer Frequency | 500.13            |
| 10 Spectral Width        | 10000.0           |
| 11 Lowest Frequency      | -1961.2           |
| 12 Nucleus               | <sup>1</sup> H    |
| 13 Acquired Size         | 32768             |
| 14 Spectral Size         | 65536             |

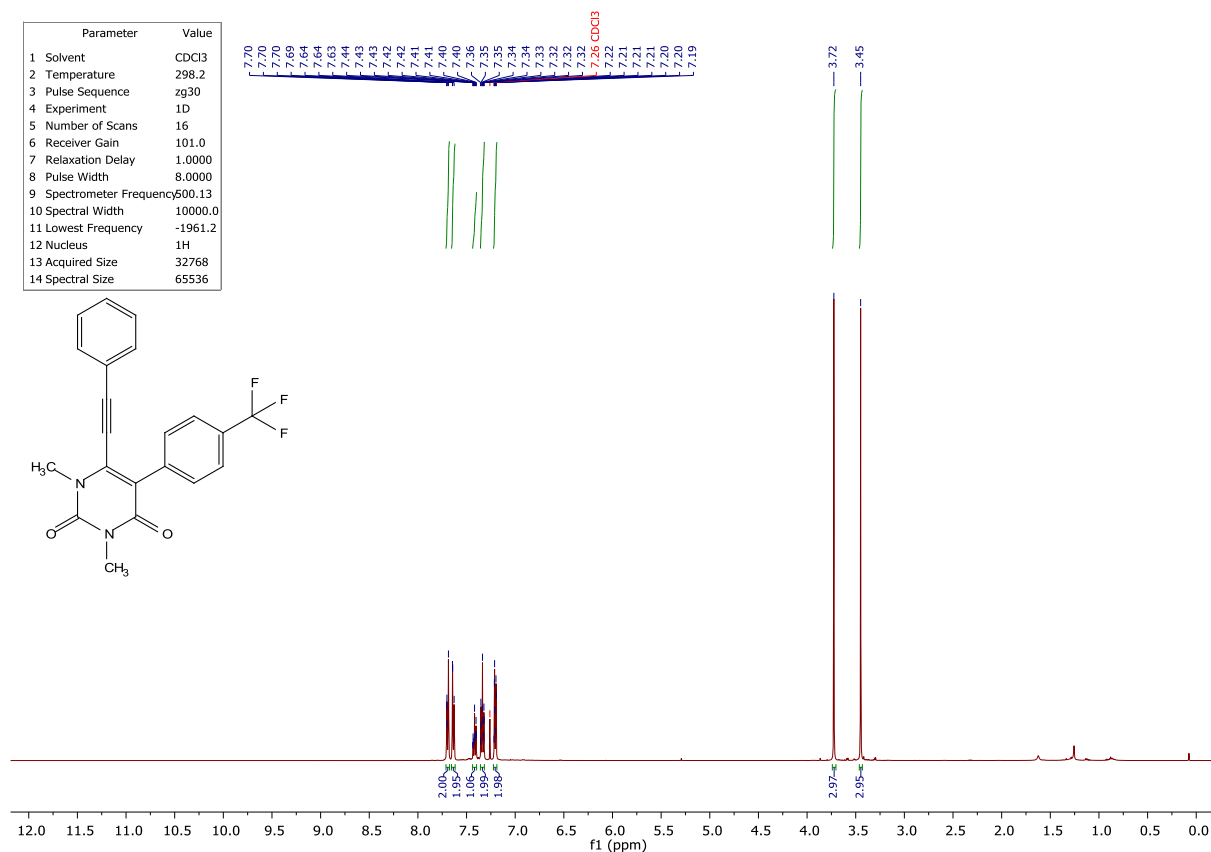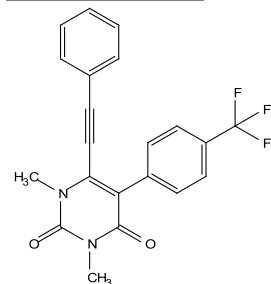

| Parameter                | Value             |
|--------------------------|-------------------|
| 1 Solvent                | CDCl <sub>3</sub> |
| 2 Temperature            | 298.3             |
| 3 Pulse Sequence         | zgig              |
| 4 Experiment             | 1D                |
| 5 Number of Scans        | 16                |
| 6 Receiver Gain          | 101.0             |
| 7 Relaxation Delay       | 1.0000            |
| 8 Pulse Width            | 12.0000           |
| 9 Spectrometer Frequency | 470.55            |
| 10 Spectral Width        | 113636.4          |
| 11 Lowest Frequency      | -103877.4         |
| 12 Nucleus               | <sup>19</sup> F   |
| 13 Acquired Size         | 65536             |
| 14 Spectral Size         | 131072            |

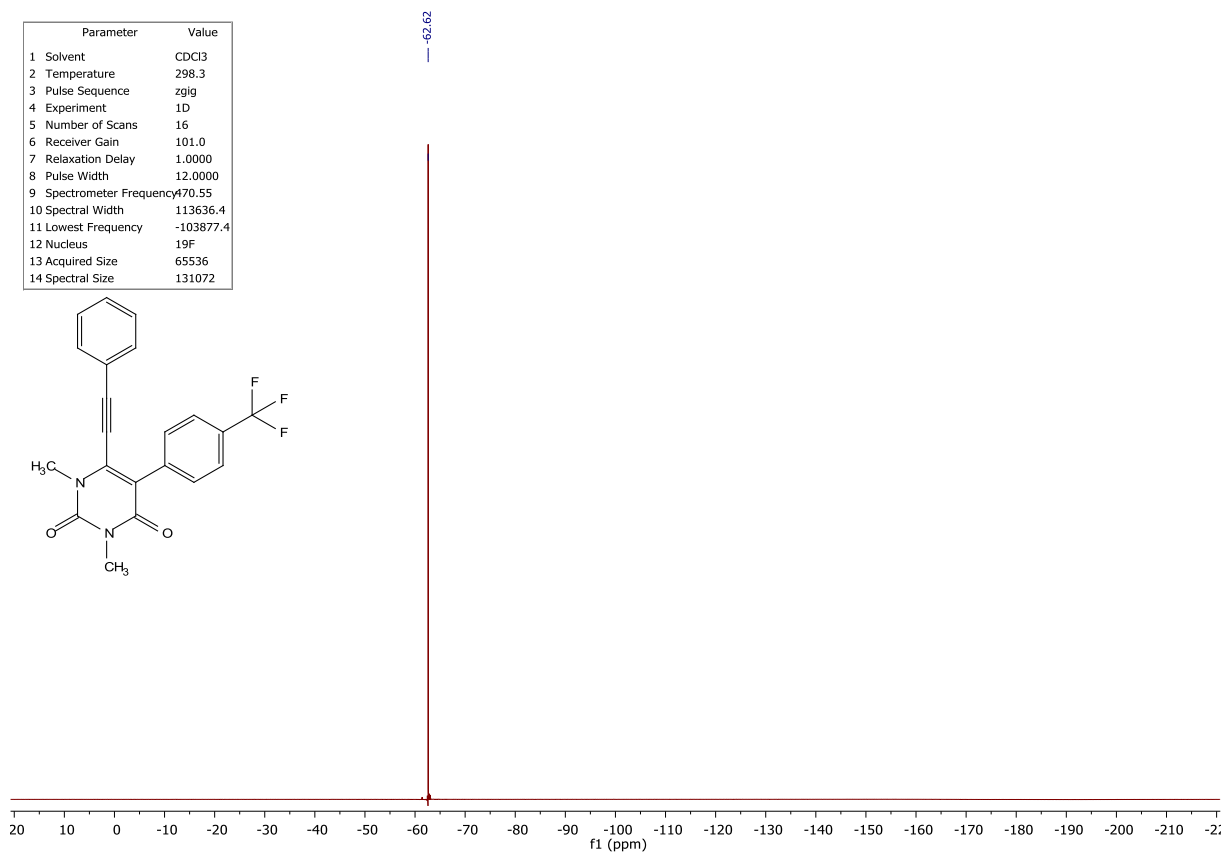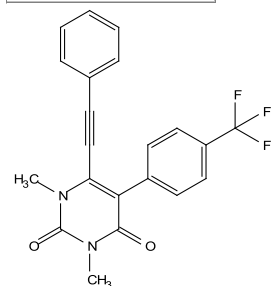

| Parameter                | Value   |
|--------------------------|---------|
| 1 Solvent                | CDCl3   |
| 2 Temperature            | 298.1   |
| 3 Pulse Sequence         | zgpg30  |
| 4 Experiment             | 1D      |
| 5 Number of Scans        | 1024    |
| 6 Receiver Gain          | 101.0   |
| 7 Relaxation Delay       | 2.0000  |
| 8 Pulse Width            | 10.0000 |
| 9 Spectrometer Frequency | 125.77  |
| 10 Spectral Width        | 30120.5 |
| 11 Lowest Frequency      | -2470.4 |
| 12 Nucleus               | 13C     |
| 13 Acquired Size         | 32768   |
| 14 Spectral Size         | 65536   |

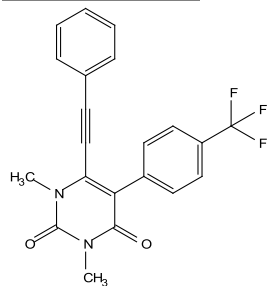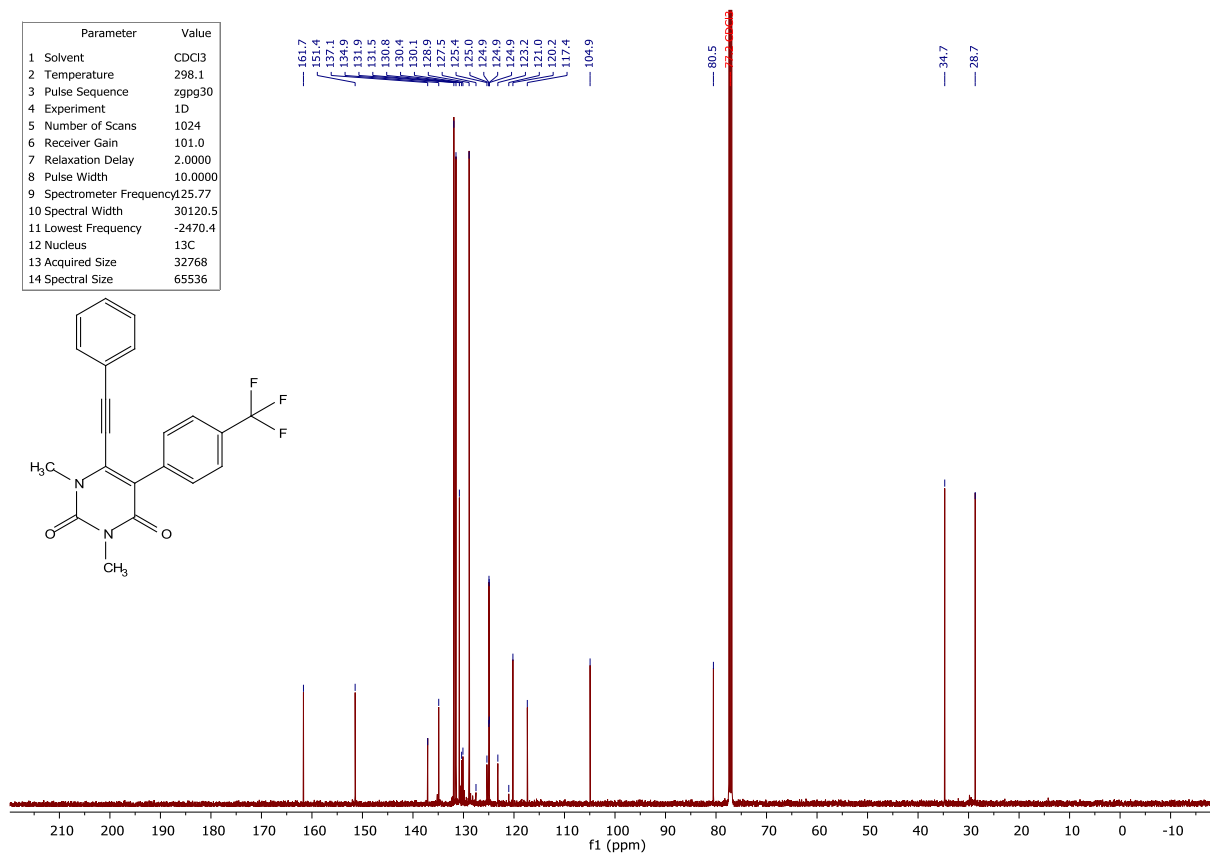

# 1,3-Dimethyl-5-(4-dimethylaminophenyl)-6-[2-(4-methylphenyl)ethynyl]uracil (5d)

| Parameter                | Value             |
|--------------------------|-------------------|
| 1 Solvent                | CDCl <sub>3</sub> |
| 2 Temperature            | 298.7             |
| 3 Pulse Sequence         | zg30              |
| 4 Experiment             | 1D                |
| 5 Number of Scans        | 16                |
| 6 Receiver Gain          | 71.8              |
| 7 Relaxation Delay       | 2.0000            |
| 8 Pulse Width            | 10.0000           |
| 9 Spectrometer Frequency | 300.13            |
| 10 Spectral Width        | 6188.1            |
| 11 Lowest Frequency      | -1246.3           |
| 12 Nucleus               | <sup>1</sup> H    |
| 13 Acquired Size         | 32768             |
| 14 Spectral Size         | 65536             |

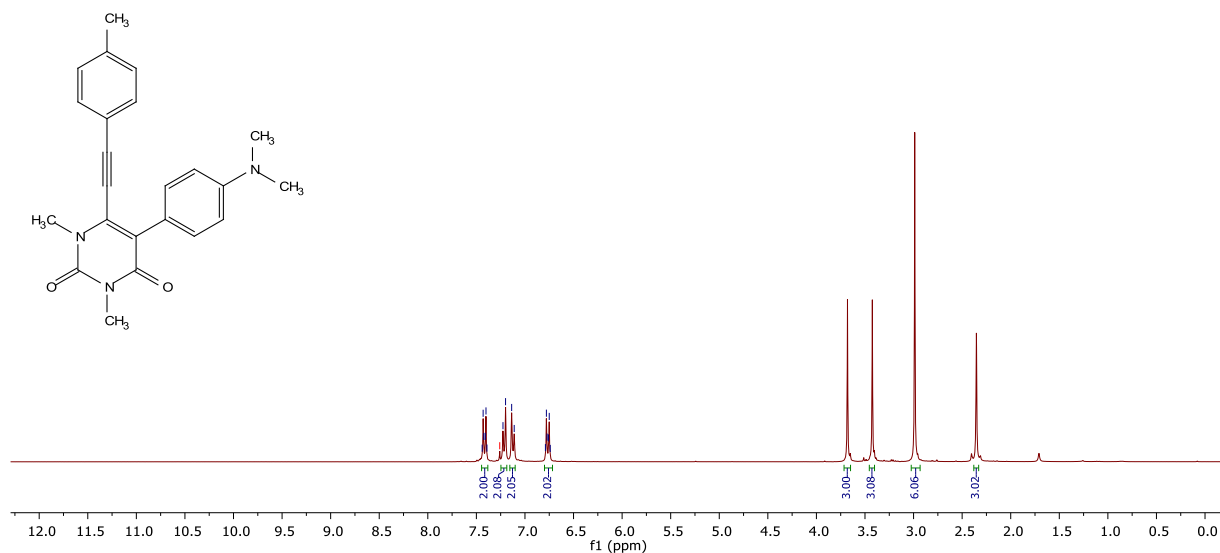

| Parameter                | Value             |
|--------------------------|-------------------|
| 1 Solvent                | CDCl <sub>3</sub> |
| 2 Temperature            | 299.5             |
| 3 Pulse Sequence         | zgpg30            |
| 4 Experiment             | 1D                |
| 5 Number of Scans        | 1024              |
| 6 Receiver Gain          | 2050.0            |
| 7 Relaxation Delay       | 2.0000            |
| 8 Pulse Width            | 10.0000           |
| 9 Spectrometer Frequency | 75.48             |
| 10 Spectral Width        | 18028.8           |
| 11 Lowest Frequency      | -1461.5           |
| 12 Nucleus               | <sup>13</sup> C   |
| 13 Acquired Size         | 32768             |
| 14 Spectral Size         | 65536             |

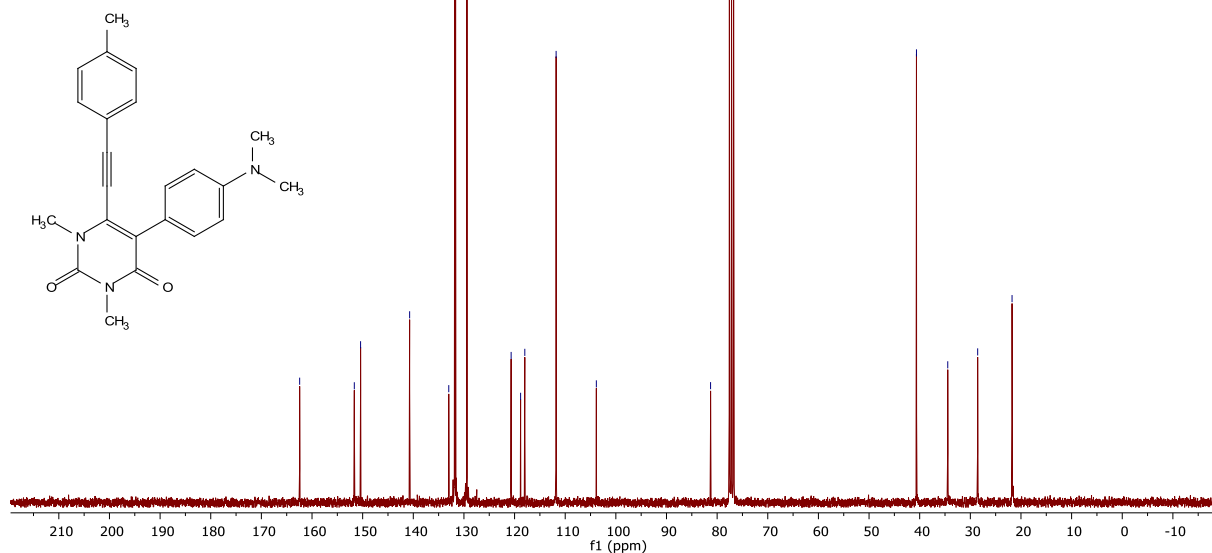

# 1,3-Dimethyl-5-(4-trifluoromethylphenyl)-6-[2-(4-methylphenyl)ethynyl]uracil (5e)

| Parameter                | Value             |
|--------------------------|-------------------|
| 1 Solvent                | CDCl <sub>3</sub> |
| 2 Temperature            | 298.2             |
| 3 Pulse Sequence         | zg30              |
| 4 Experiment             | 1D                |
| 5 Number of Scans        | 16                |
| 6 Receiver Gain          | 228.0             |
| 7 Relaxation Delay       | 2.0000            |
| 8 Pulse Width            | 10.0000           |
| 9 Spectrometer Frequency | 800.13            |
| 10 Spectral Width        | 6188.1            |
| 11 Lowest Frequency      | -1247.0           |
| 12 Nucleus               | <sup>1</sup> H    |
| 13 Acquired Size         | 32768             |
| 14 Spectral Size         | 65536             |

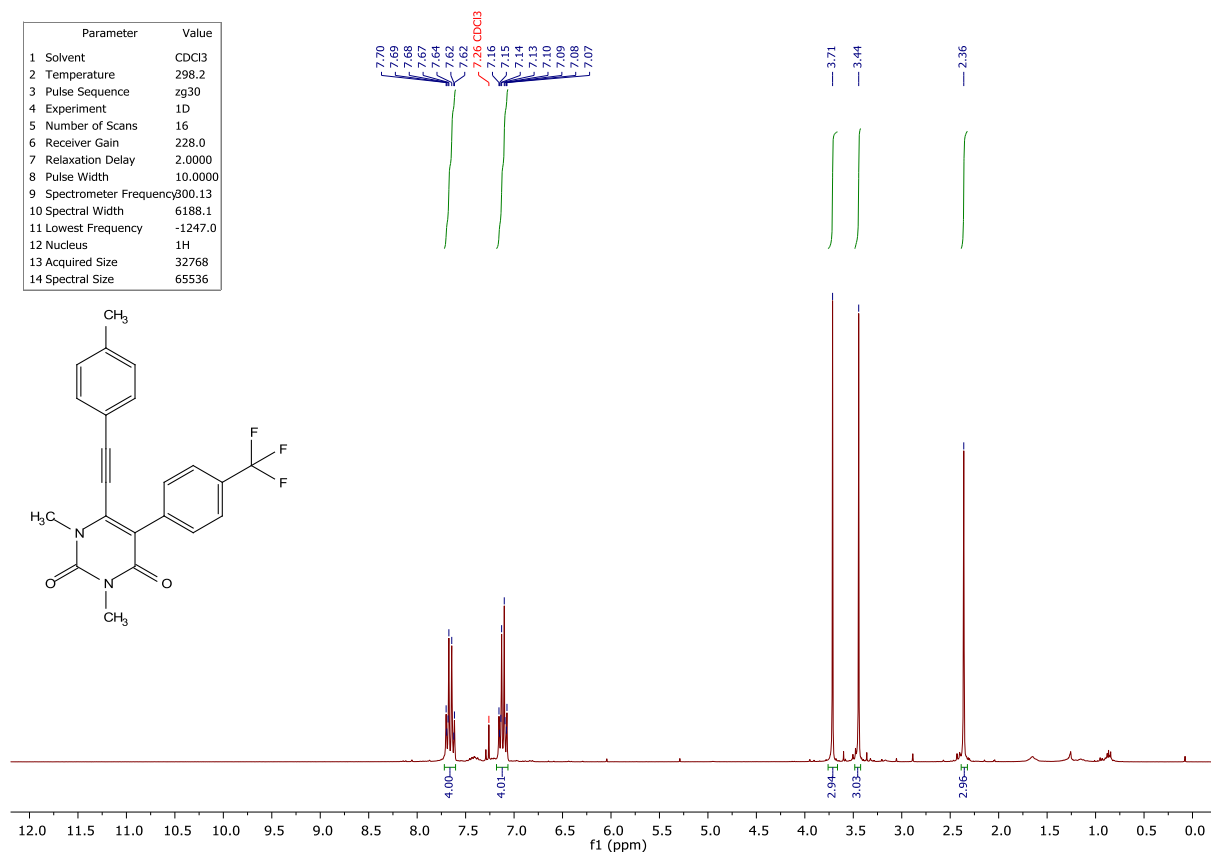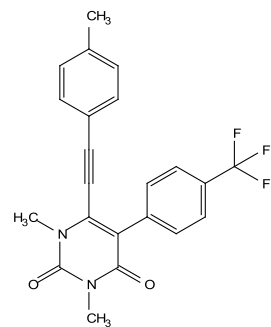

| Parameter                | Value             |
|--------------------------|-------------------|
| 1 Solvent                | CDCl <sub>3</sub> |
| 2 Temperature            | 298.2             |
| 3 Pulse Sequence         | zgig              |
| 4 Experiment             | 1D                |
| 5 Number of Scans        | 16                |
| 6 Receiver Gain          | 101.0             |
| 7 Relaxation Delay       | 1.0000            |
| 8 Pulse Width            | 12.0000           |
| 9 Spectrometer Frequency | 470.55            |
| 10 Spectral Width        | 113636.4          |
| 11 Lowest Frequency      | -103877.4         |
| 12 Nucleus               | <sup>19</sup> F   |
| 13 Acquired Size         | 65536             |
| 14 Spectral Size         | 131072            |

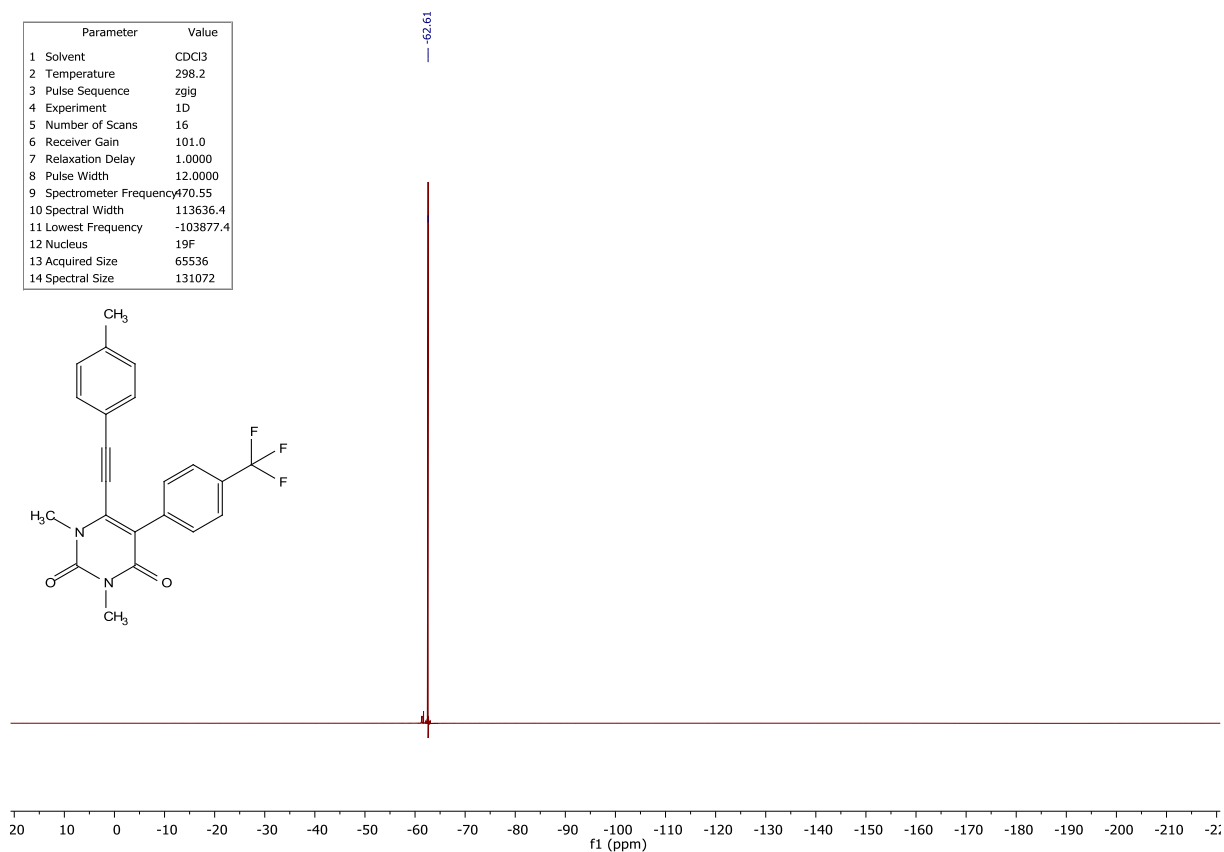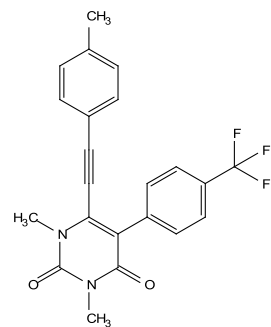



# 1,3-Dimethyl-5-[2-(4-methylphenyl)ethenyl]-6-[2-(4-methylphenyl)ethynyl]uracil (5f)

| Parameter                | Value             |
|--------------------------|-------------------|
| 1 Solvent                | CDCl <sub>3</sub> |
| 2 Temperature            | 298.2             |
| 3 Pulse Sequence         | zg30              |
| 4 Experiment             | 1D                |
| 5 Number of Scans        | 16                |
| 6 Receiver Gain          | 80.6              |
| 7 Relaxation Delay       | 2.0000            |
| 8 Pulse Width            | 10.0000           |
| 9 Spectrometer Frequency | 300.13            |
| 10 Spectral Width        | 6188.1            |
| 11 Lowest Frequency      | -1257.2           |
| 12 Nucleus               | <sup>1</sup> H    |
| 13 Acquired Size         | 32768             |
| 14 Spectral Size         | 65536             |

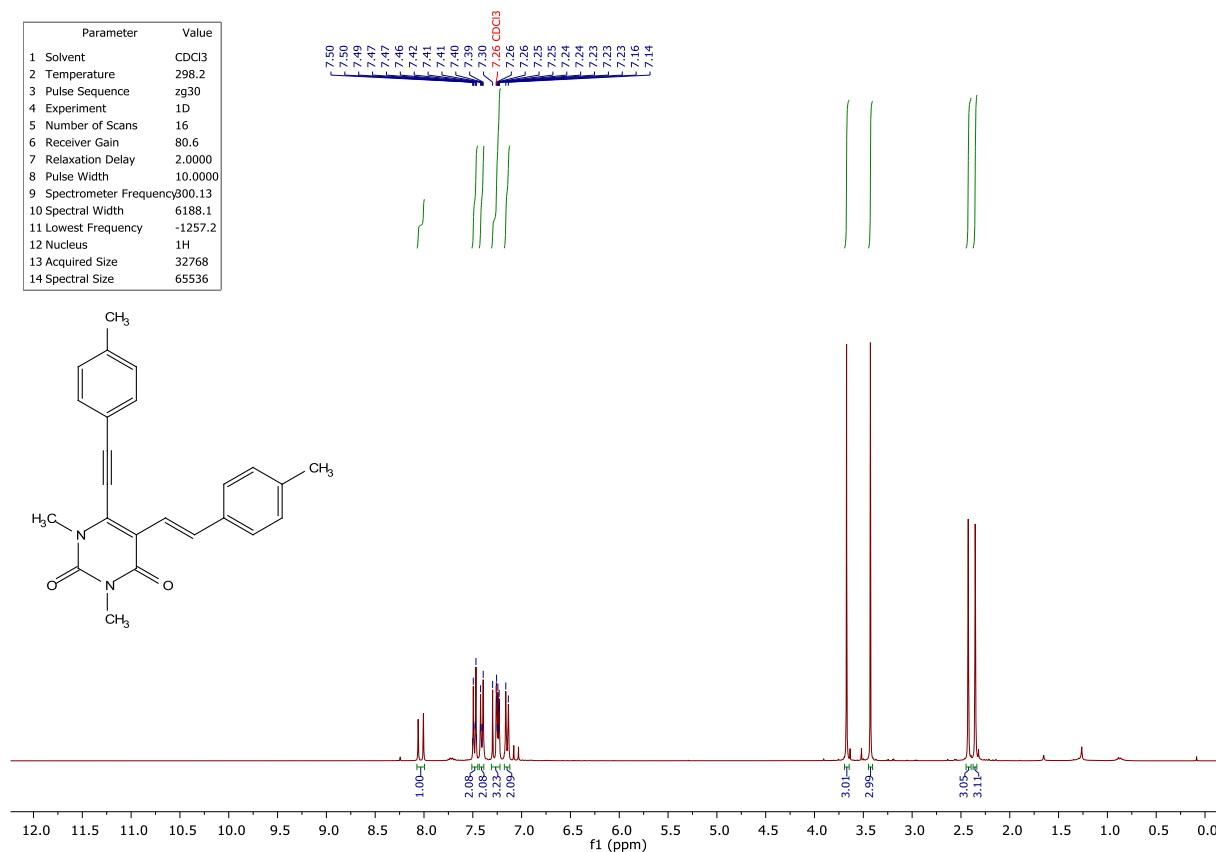

| Parameter                | Value             |
|--------------------------|-------------------|
| 1 Solvent                | CDCl <sub>3</sub> |
| 2 Temperature            | 298.2             |
| 3 Pulse Sequence         | zgpg30            |
| 4 Experiment             | 1D                |
| 5 Number of Scans        | 1024              |
| 6 Receiver Gain          | 2050.0            |
| 7 Relaxation Delay       | 2.0000            |
| 8 Pulse Width            | 10.0000           |
| 9 Spectrometer Frequency | 75.48             |
| 10 Spectral Width        | 18028.8           |
| 11 Lowest Frequency      | -1460.3           |
| 12 Nucleus               | <sup>13</sup> C   |
| 13 Acquired Size         | 32768             |
| 14 Spectral Size         | 65536             |

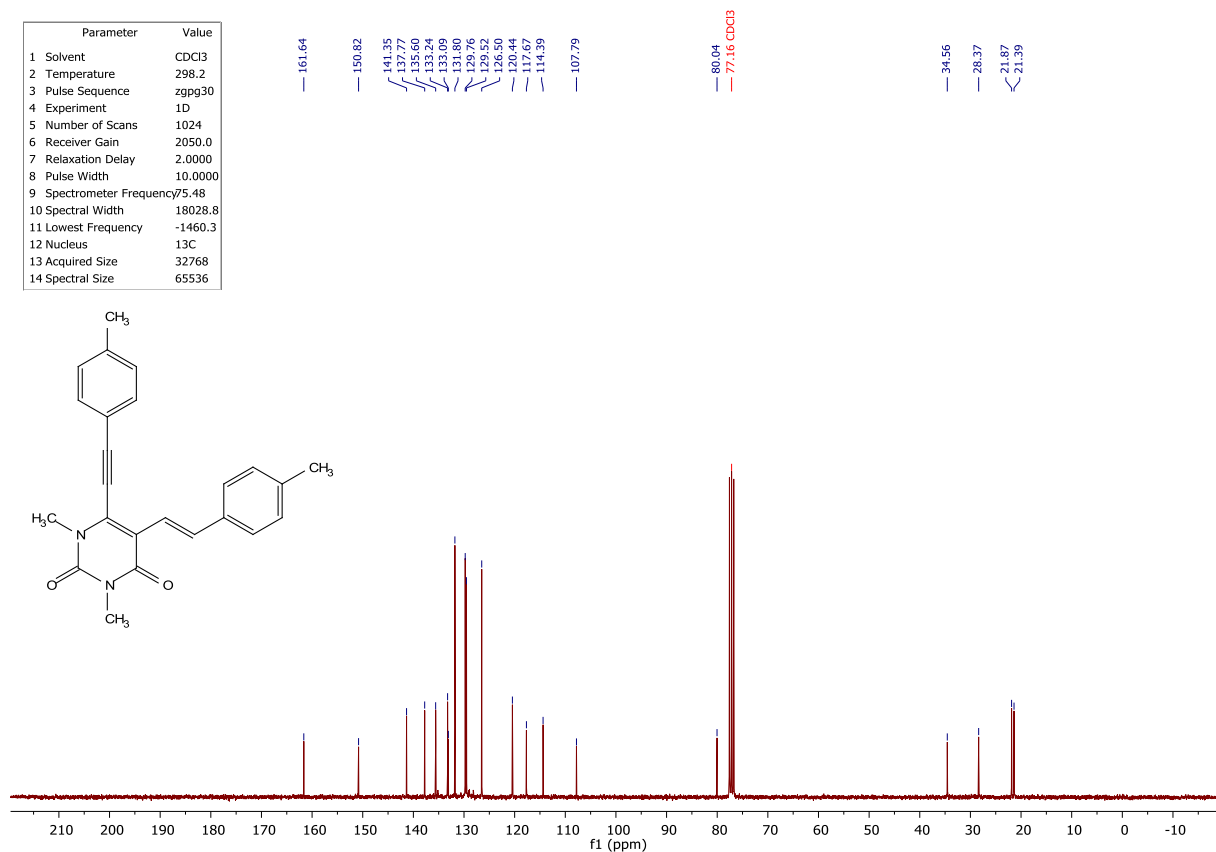

**(E)-1,3-Dimethyl-6-(*p*-tolylethynyl)-5-(4-(trifluoromethyl)styryl)pyrimidine-2,4(1*H*,3*H*)-dione (5g)**

| Parameter                | Value             |
|--------------------------|-------------------|
| 1 Solvent                | CDCl <sub>3</sub> |
| 2 Temperature            | 298.2             |
| 3 Pulse Sequence         | zg30              |
| 4 Experiment             | 1D                |
| 5 Number of Scans        | 16                |
| 6 Receiver Gain          | 161.0             |
| 7 Relaxation Delay       | 2.0000            |
| 8 Pulse Width            | 10.0000           |
| 9 Spectrometer Frequency | 300.13            |
| 10 Spectral Width        | 6188.1            |
| 11 Lowest Frequency      | -1246.3           |
| 12 Nucleus               | <sup>1</sup> H    |
| 13 Acquired Size         | 32768             |
| 14 Spectral Size         | 65536             |

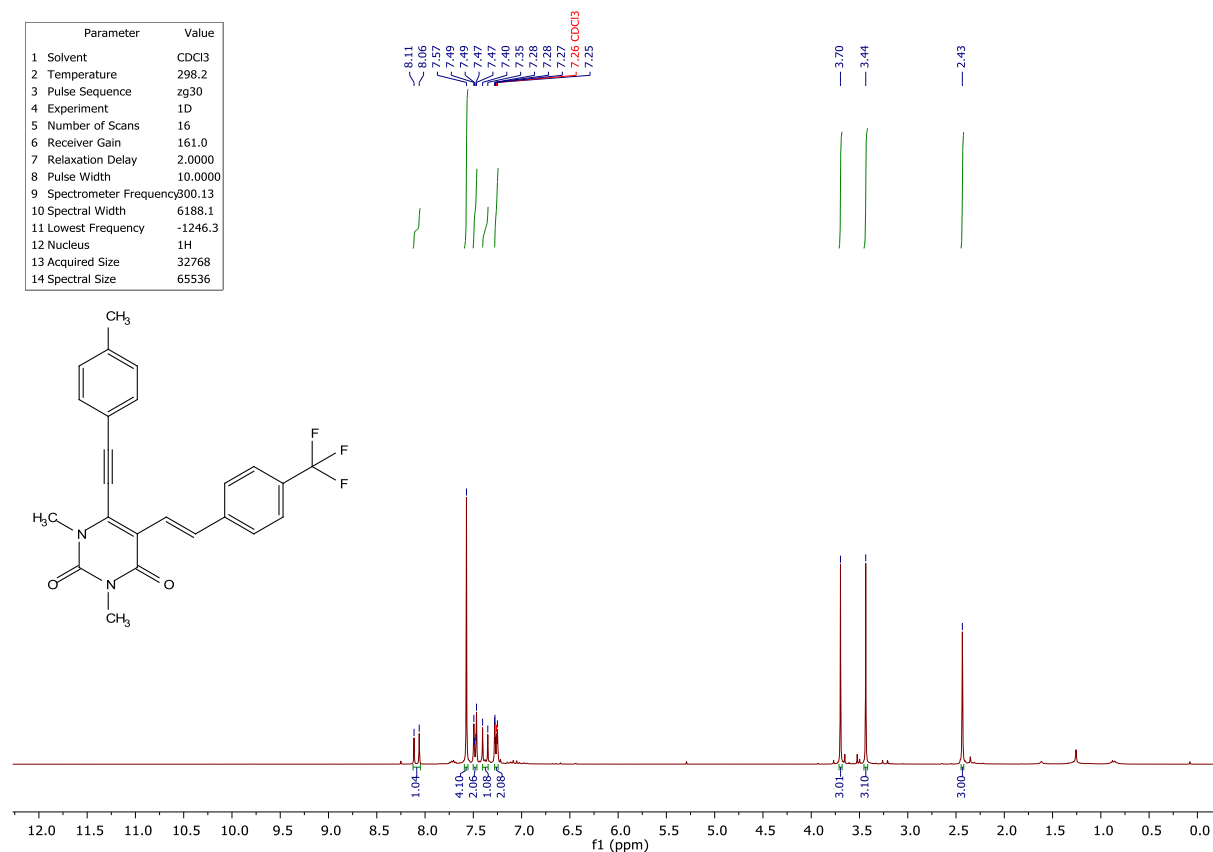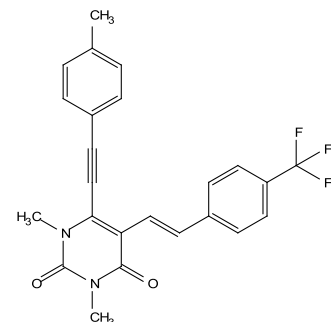

| Parameter                | Value             |
|--------------------------|-------------------|
| 1 Solvent                | CDCl <sub>3</sub> |
| 2 Temperature            | 298.2             |
| 3 Pulse Sequence         | zgfhgqn           |
| 4 Experiment             | 1D                |
| 5 Number of Scans        | 64                |
| 6 Receiver Gain          | 2050.0            |
| 7 Relaxation Delay       | 1.0000            |
| 8 Pulse Width            | 10.0000           |
| 9 Spectrometer Frequency | 282.38            |
| 10 Spectral Width        | 66964.3           |
| 11 Lowest Frequency      | -61722.4          |
| 12 Nucleus               | <sup>19</sup> F   |
| 13 Acquired Size         | 65536             |
| 14 Spectral Size         | 131072            |

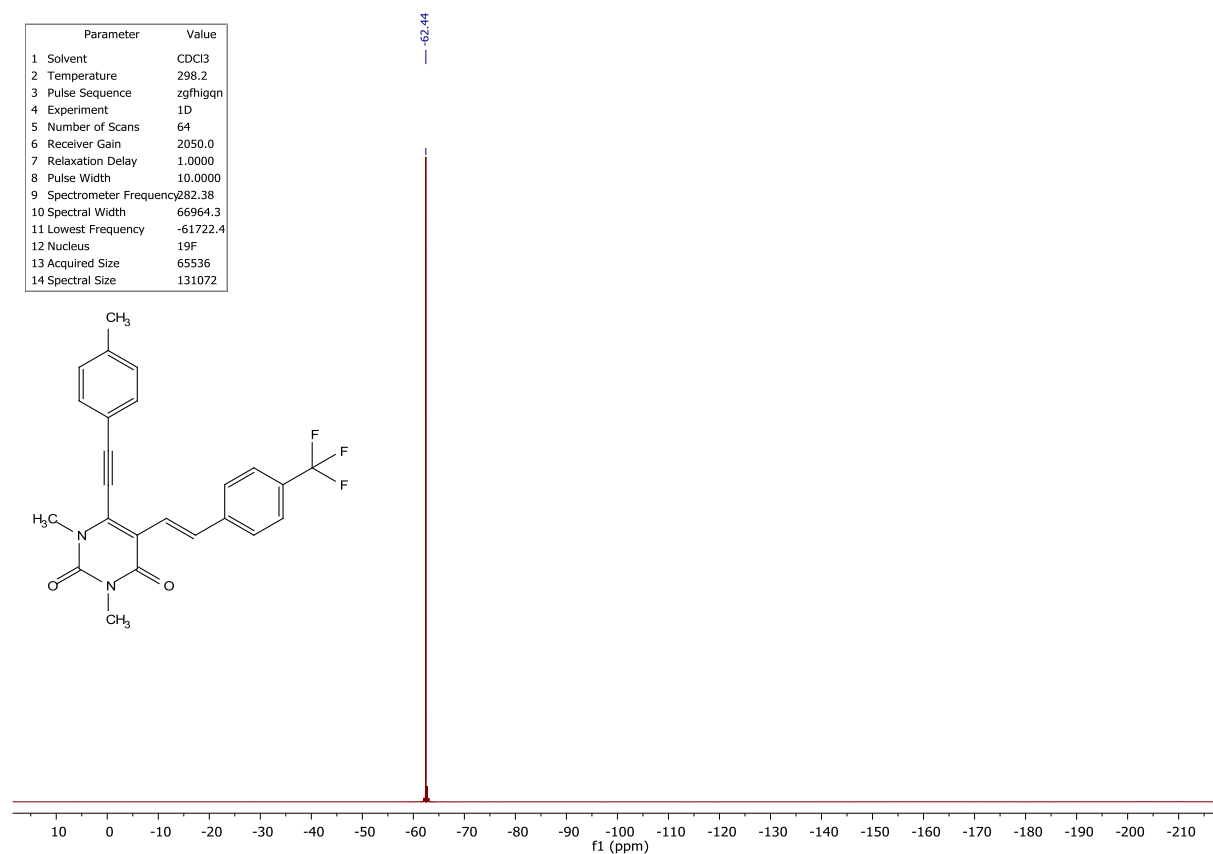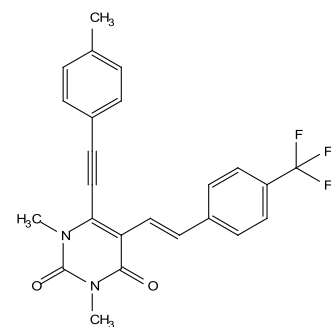

| Parameter                | Value           |
|--------------------------|-----------------|
| 1 Solvent                | CDCl3           |
| 2 Temperature            | 298.2           |
| 3 Pulse Sequence         | zgpg30          |
| 4 Experiment             | 1D              |
| 5 Number of Scans        | 2048            |
| 6 Receiver Gain          | 2050.0          |
| 7 Relaxation Delay       | 2.0000          |
| 8 Pulse Width            | 10.0000         |
| 9 Spectrometer Frequency | 75.48           |
| 10 Spectral Width        | 18028.8         |
| 11 Lowest Frequency      | -1458.4         |
| 12 Nucleus               | <sup>13</sup> C |
| 13 Acquired Size         | 32768           |
| 14 Spectral Size         | 65536           |

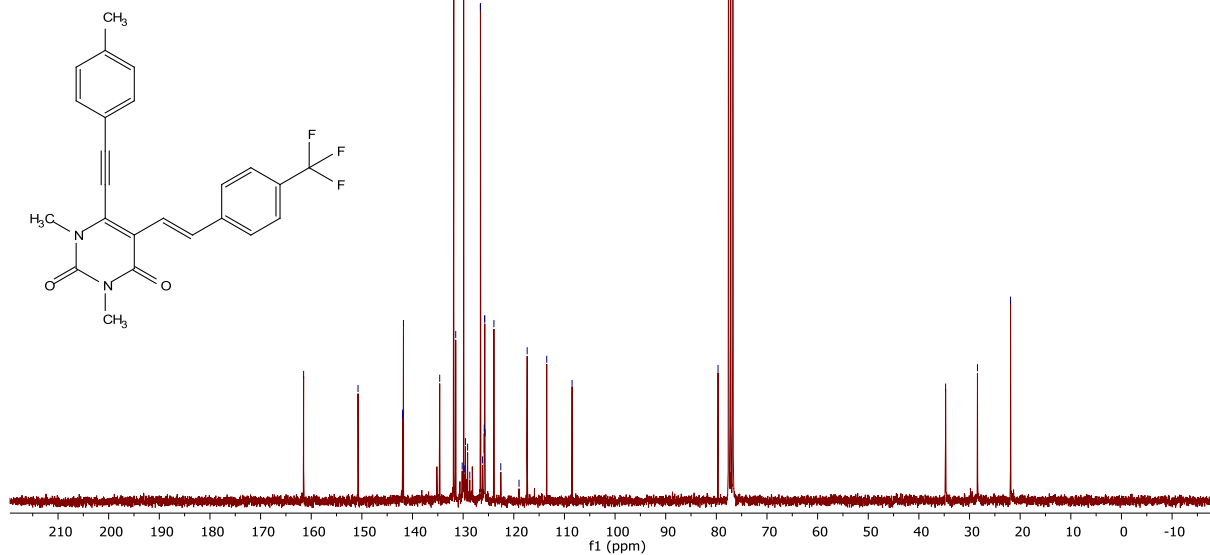



# 1,3-Dimethyl-5-(4-dimethylaminophenyl)-6-[2-(biphenyl)ethynyl]uracil (5i)

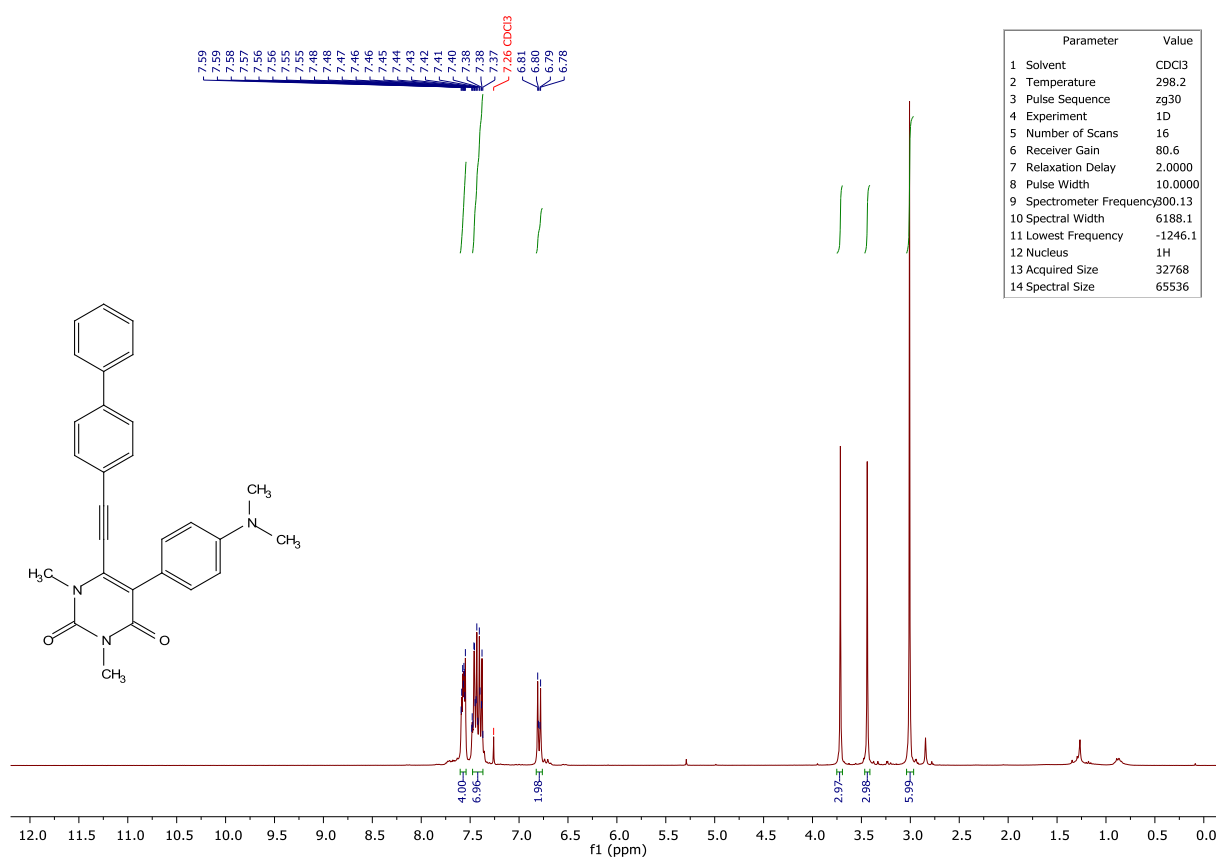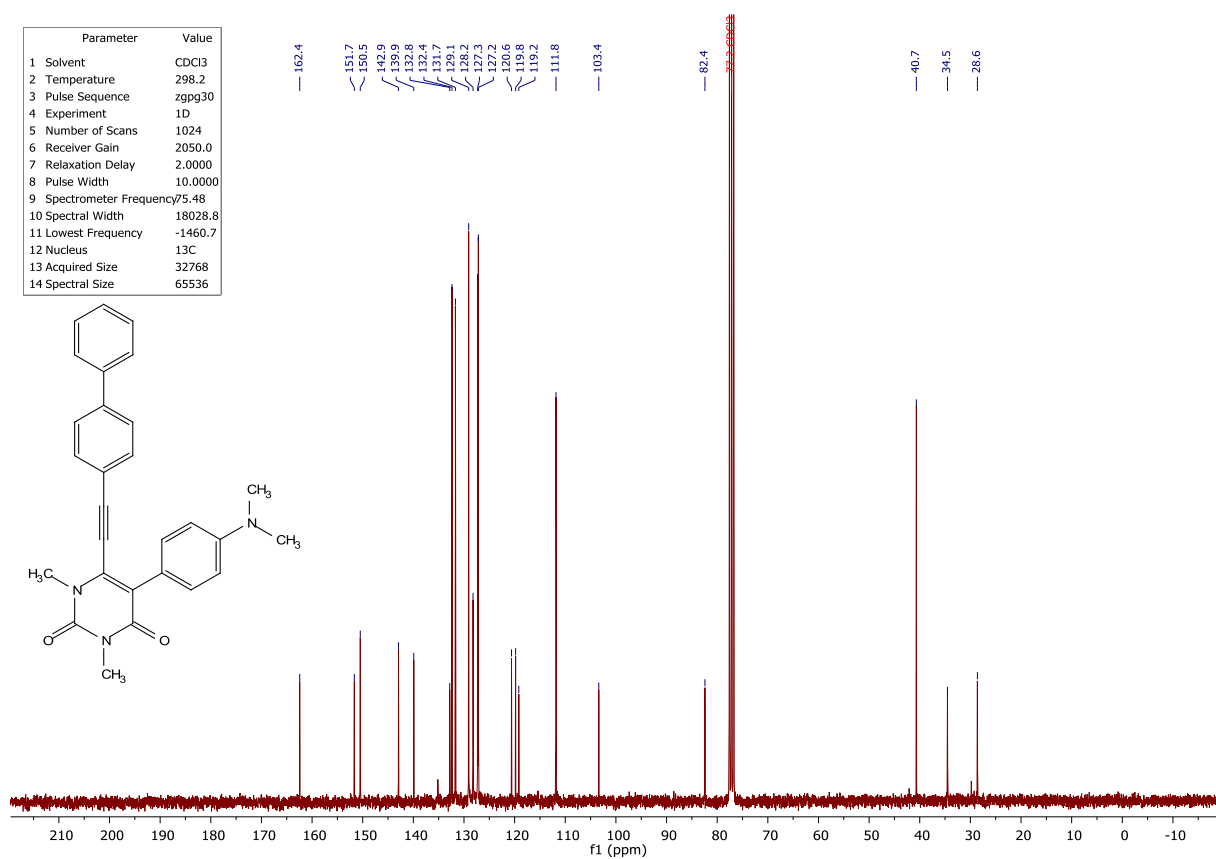

# 1,3-Dimethyl-5-(4-*tert*-butylphenyl)-6-[2-(4-*tert*-butylphenyl)ethynyl]uracil (5j)

| Parameter                | Value             |
|--------------------------|-------------------|
| 1 Solvent                | CDCl <sub>3</sub> |
| 2 Temperature            | 298.1             |
| 3 Pulse Sequence         | zg30              |
| 4 Experiment             | 1D                |
| 5 Number of Scans        | 16                |
| 6 Receiver Gain          | 101.0             |
| 7 Relaxation Delay       | 1.0000            |
| 8 Pulse Width            | 8.0000            |
| 9 Spectrometer Frequency | 500.13            |
| 10 Spectral Width        | 10000.0           |
| 11 Lowest Frequency      | -1924.3           |
| 12 Nucleus               | <sup>1</sup> H    |
| 13 Acquired Size         | 32768             |
| 14 Spectral Size         | 65536             |

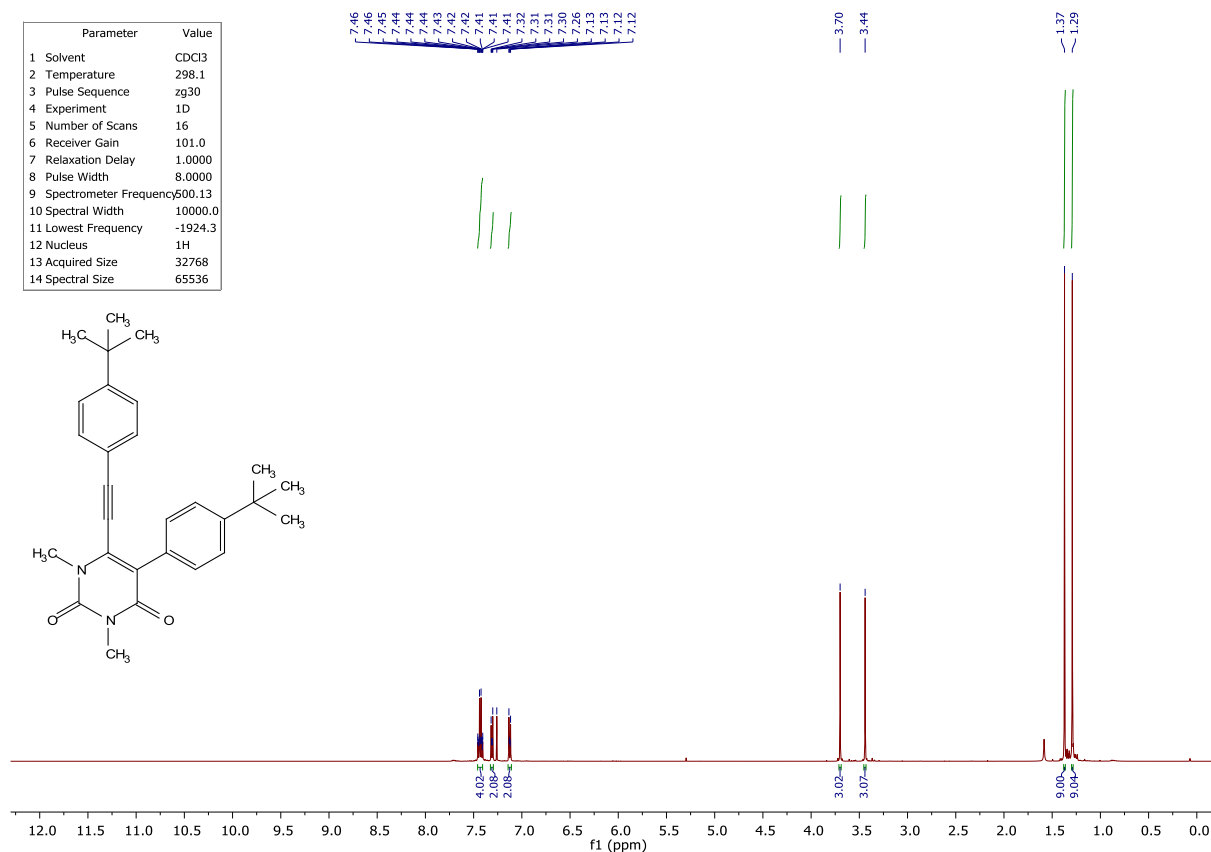

| Parameter                | Value             |
|--------------------------|-------------------|
| 1 Solvent                | CDCl <sub>3</sub> |
| 2 Temperature            | 298.2             |
| 3 Pulse Sequence         | zgpg30            |
| 4 Experiment             | 1D                |
| 5 Number of Scans        | 1024              |
| 6 Receiver Gain          | 101.0             |
| 7 Relaxation Delay       | 2.0000            |
| 8 Pulse Width            | 10.0000           |
| 9 Spectrometer Frequency | 125.77            |
| 10 Spectral Width        | 30120.5           |
| 11 Lowest Frequency      | -2468.6           |
| 12 Nucleus               | <sup>13</sup> C   |
| 13 Acquired Size         | 32768             |
| 14 Spectral Size         | 65536             |

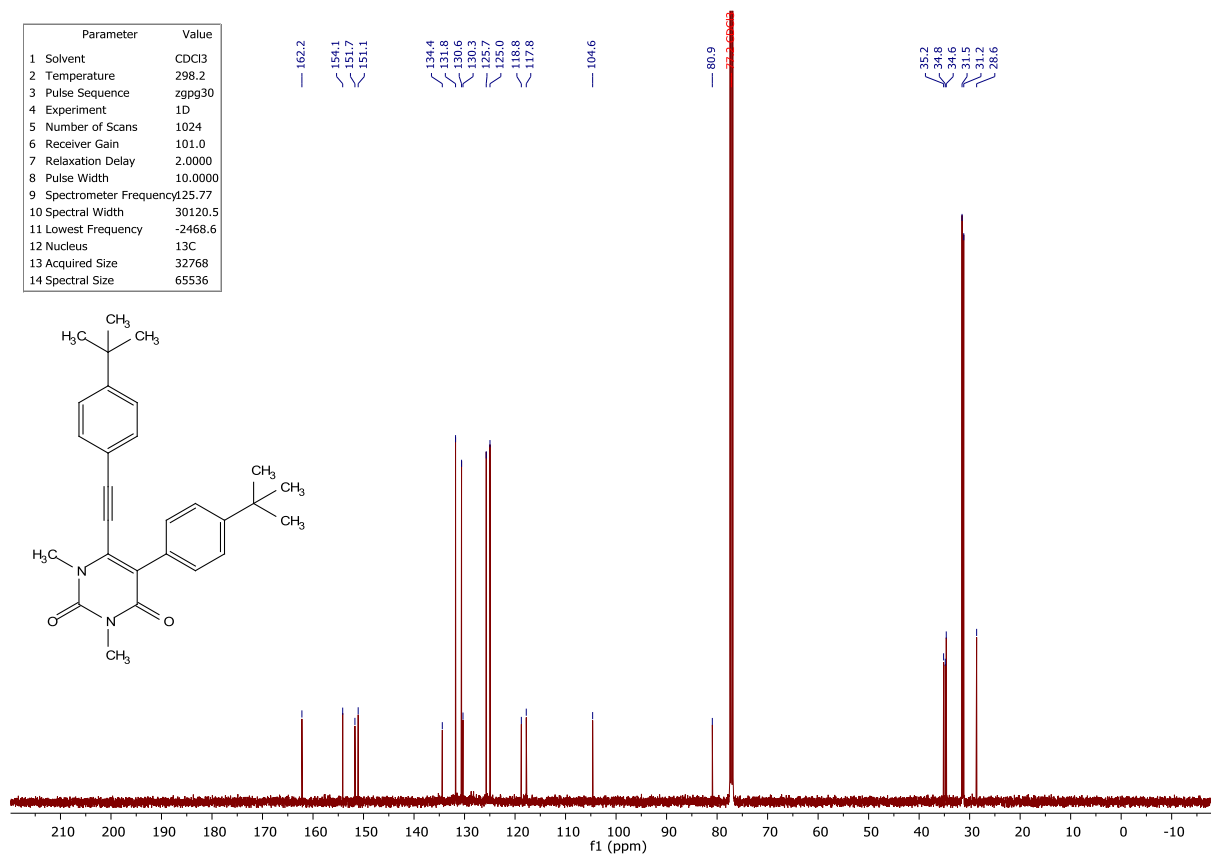

# 1,3-Dimethyl-5-(4-methylphenyl)-6-[2-(4-dimethylaminophenyl)ethynyl]uracil (5k)

| Parameter                | Value             |
|--------------------------|-------------------|
| 1 Solvent                | CDCl <sub>3</sub> |
| 2 Temperature            | 298.2             |
| 3 Pulse Sequence         | zg30              |
| 4 Experiment             | 1D                |
| 5 Number of Scans        | 16                |
| 6 Receiver Gain          | 203.0             |
| 7 Relaxation Delay       | 2.0000            |
| 8 Pulse Width            | 10.0000           |
| 9 Spectrometer Frequency | 800.13            |
| 10 Spectral Width        | 6188.1            |
| 11 Lowest Frequency      | -1247.1           |
| 12 Nucleus               | <sup>1</sup> H    |
| 13 Acquired Size         | 32768             |
| 14 Spectral Size         | 65536             |

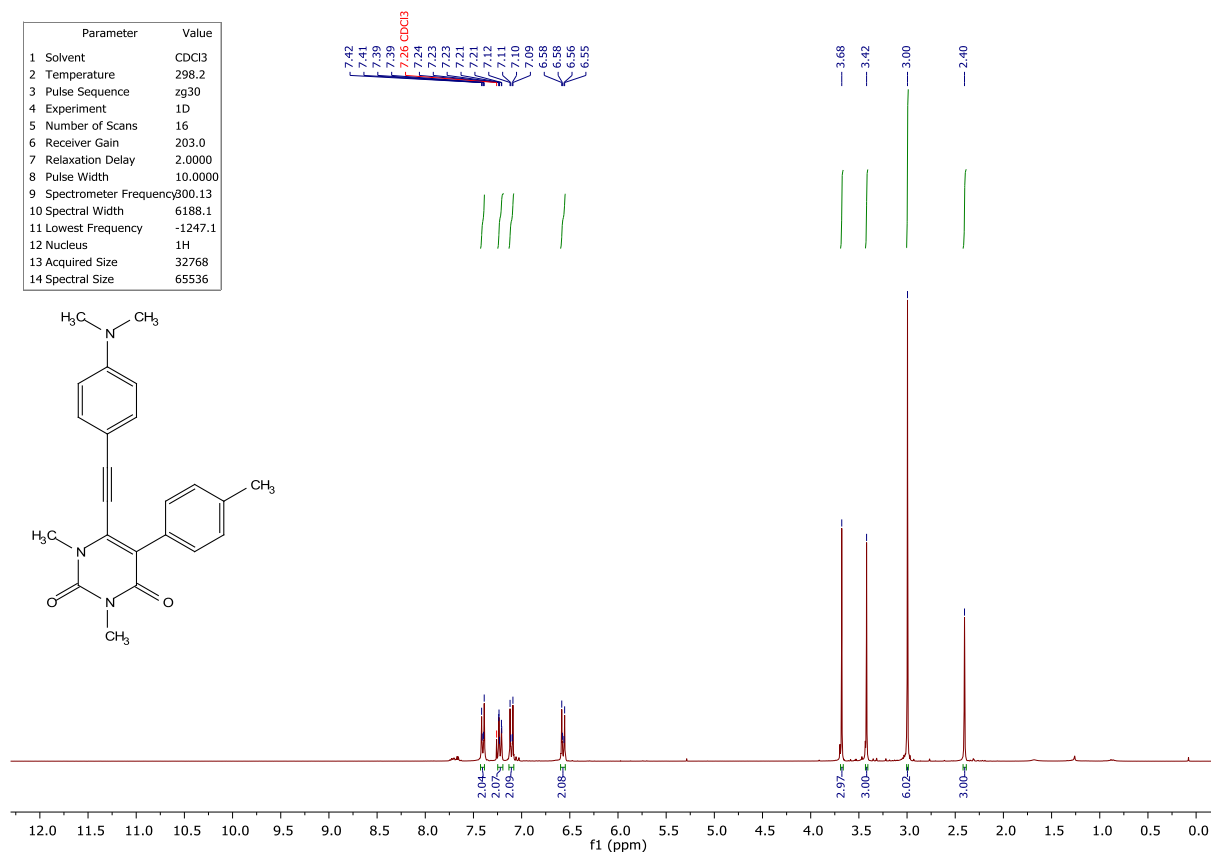

| Parameter                | Value             |
|--------------------------|-------------------|
| 1 Solvent                | CDCl <sub>3</sub> |
| 2 Temperature            | 298.2             |
| 3 Pulse Sequence         | zgpg30            |
| 4 Experiment             | 1D                |
| 5 Number of Scans        | 1024              |
| 6 Receiver Gain          | 2050.0            |
| 7 Relaxation Delay       | 2.0000            |
| 8 Pulse Width            | 9.6000            |
| 9 Spectrometer Frequency | 75.48             |
| 10 Spectral Width        | 18028.8           |
| 11 Lowest Frequency      | -1460.8           |
| 12 Nucleus               | <sup>13</sup> C   |
| 13 Acquired Size         | 32768             |
| 14 Spectral Size         | 65536             |

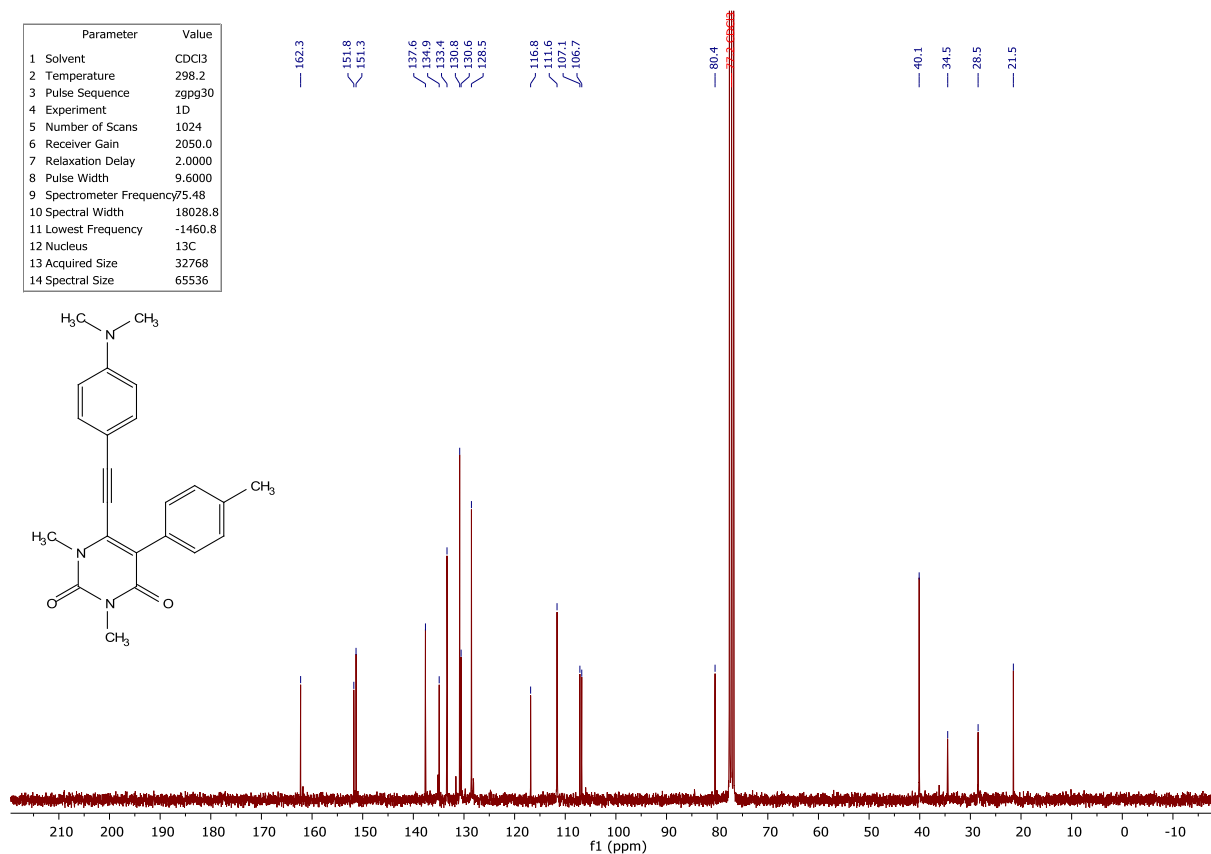

# 1,3-Dimethyl-5-(4-trifluoromethylphenyl)-6-[2-(4-dimethylaminophenyl)ethynyl]uracil (5I)

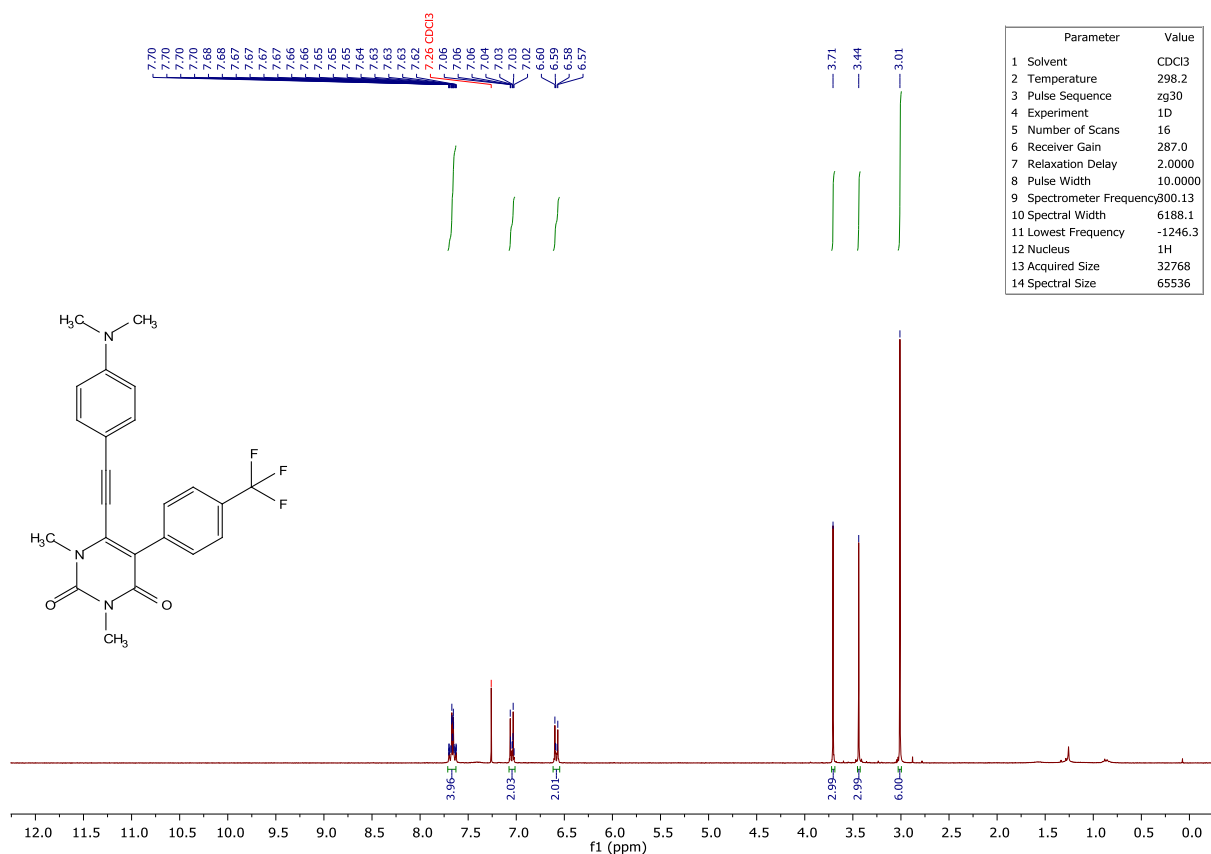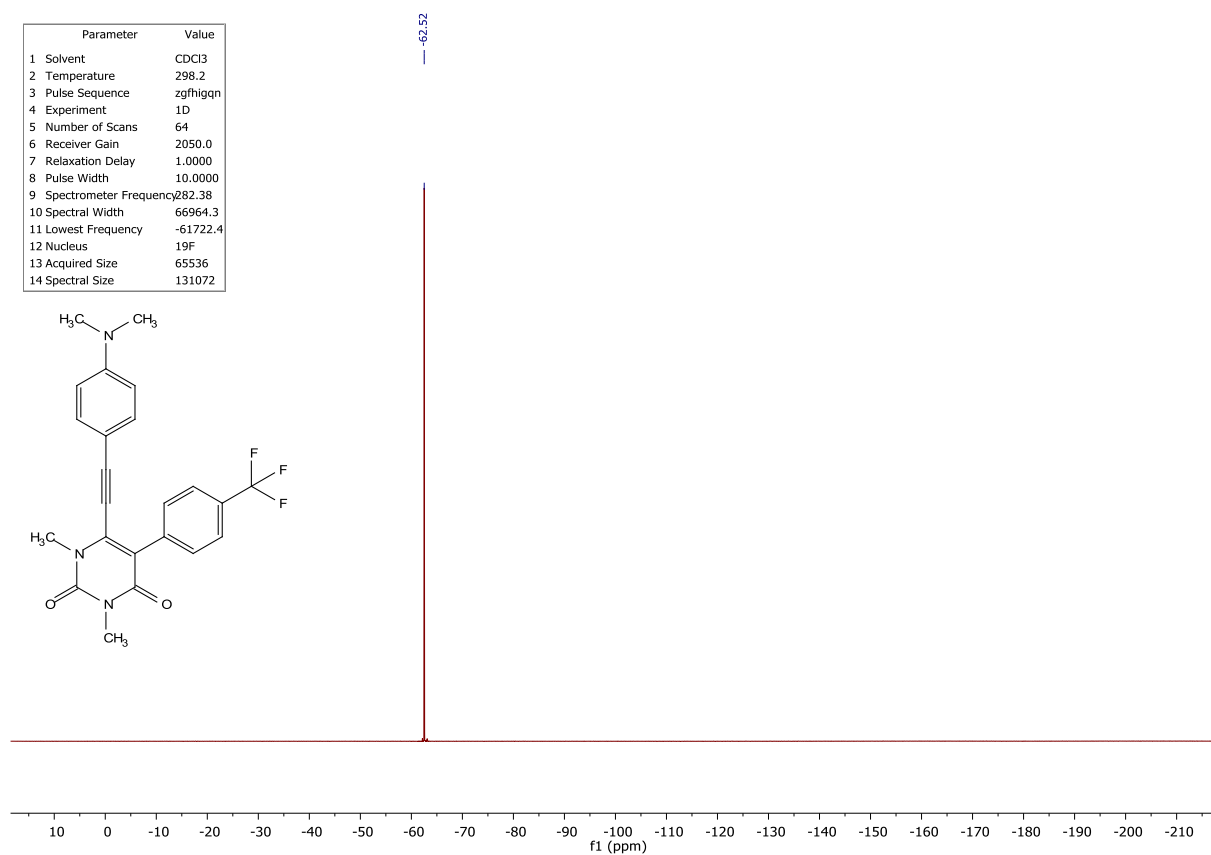

| Parameter                | Value           |
|--------------------------|-----------------|
| 1 Solvent                | CDCl3           |
| 2 Temperature            | 298.2           |
| 3 Pulse Sequence         | zgpg30          |
| 4 Experiment             | 1D              |
| 5 Number of Scans        | 5120            |
| 6 Receiver Gain          | 2050.0          |
| 7 Relaxation Delay       | 2.0000          |
| 8 Pulse Width            | 10.0000         |
| 9 Spectrometer Frequency | 62.90           |
| 10 Spectral Width        | 15000.0         |
| 11 Lowest Frequency      | -1201.0         |
| 12 Nucleus               | <sup>13</sup> C |
| 13 Acquired Size         | 32768           |
| 14 Spectral Size         | 65536           |

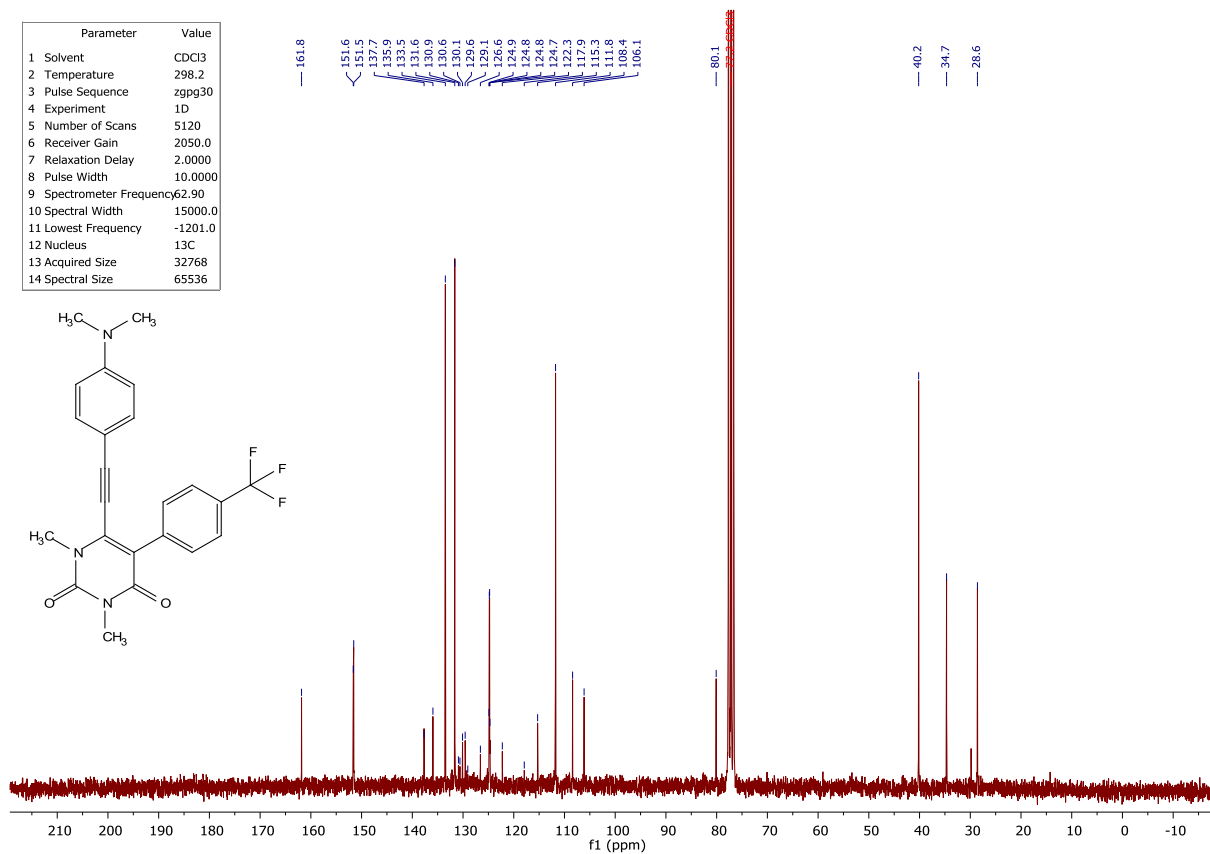

# 1,3-Dimethyl-5-(4-dimethylaminophenyl)-6-[2-(4-dimethylaminophenyl)ethynyl]uracil (5m)

| Parameter                | Value             |
|--------------------------|-------------------|
| 1 Solvent                | CDCl <sub>3</sub> |
| 2 Temperature            | 298.2             |
| 3 Pulse Sequence         | zg30              |
| 4 Experiment             | 1D                |
| 5 Number of Scans        | 16                |
| 6 Receiver Gain          | 101.0             |
| 7 Relaxation Delay       | 1.0000            |
| 8 Pulse Width            | 8.0000            |
| 9 Spectrometer Frequency | 500.13            |
| 10 Spectral Width        | 10000.0           |
| 11 Lowest Frequency      | -1924.9           |
| 12 Nucleus               | <sup>1</sup> H    |
| 13 Acquired Size         | 32768             |
| 14 Spectral Size         | 65536             |

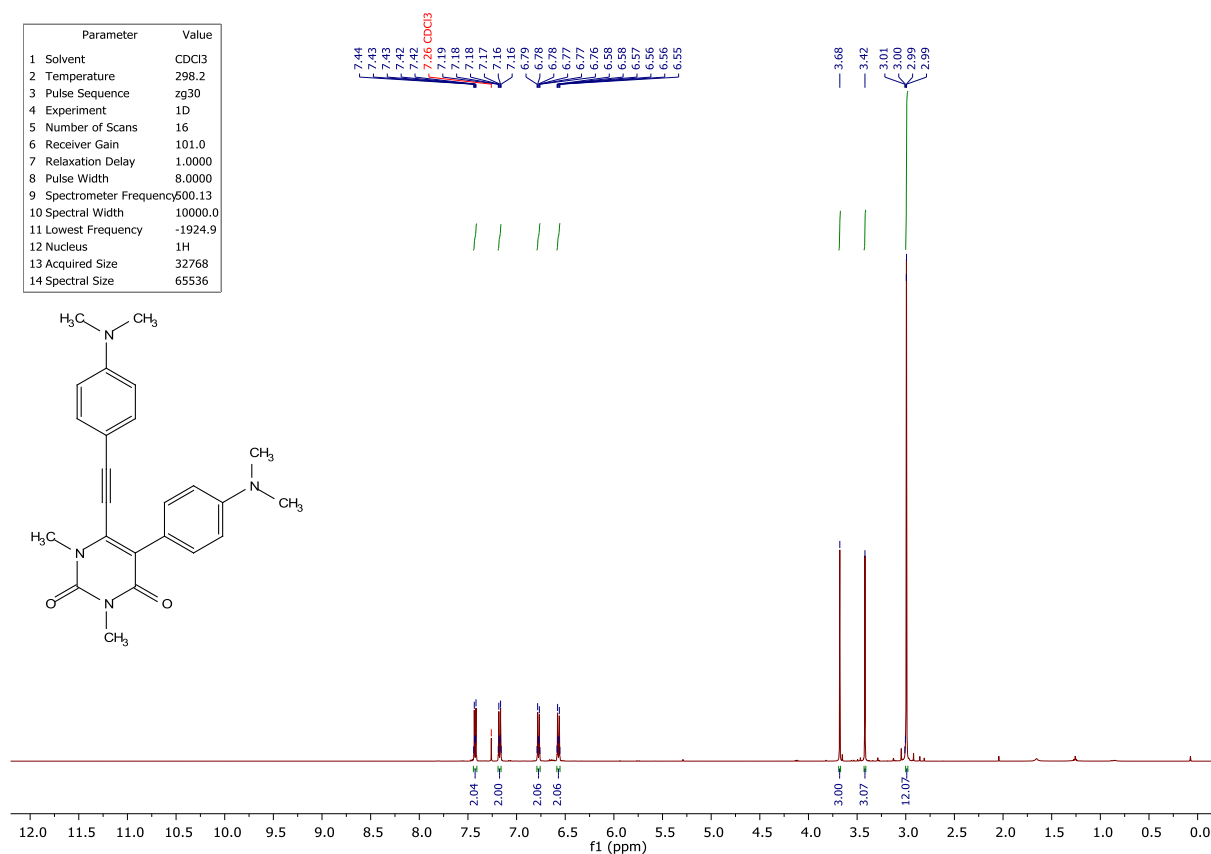

| Parameter                | Value             |
|--------------------------|-------------------|
| 1 Solvent                | CDCl <sub>3</sub> |
| 2 Temperature            | 298.1             |
| 3 Pulse Sequence         | zgpg30            |
| 4 Experiment             | 1D                |
| 5 Number of Scans        | 1024              |
| 6 Receiver Gain          | 101.0             |
| 7 Relaxation Delay       | 2.0000            |
| 8 Pulse Width            | 10.0000           |
| 9 Spectrometer Frequency | 125.77            |
| 10 Spectral Width        | 30120.5           |
| 11 Lowest Frequency      | -2472.3           |
| 12 Nucleus               | <sup>13</sup> C   |
| 13 Acquired Size         | 32768             |
| 14 Spectral Size         | 65536             |

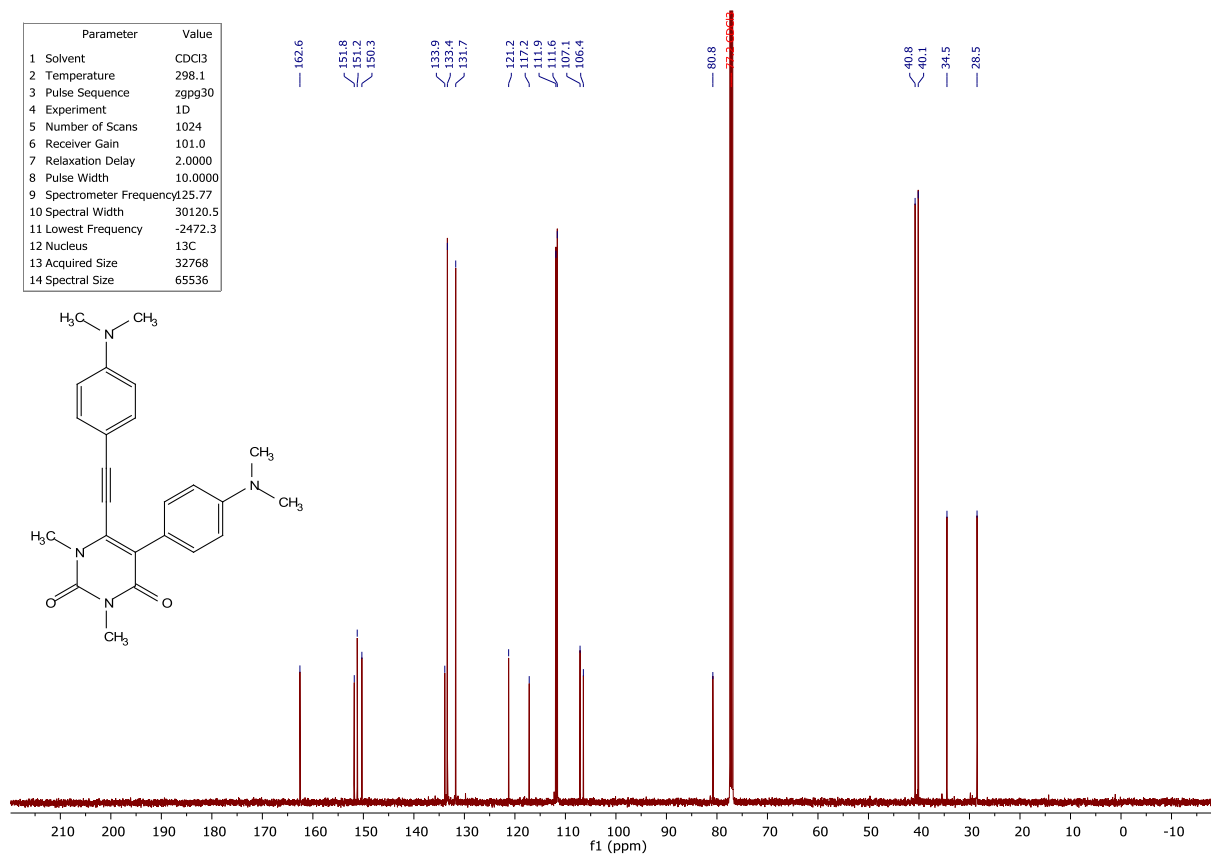

**1,3-Dimethyl-6-[2-(4-fluorophenyl)ethynyl]-5-(4-dimethylaminophenyl)uracil (5p)**

|    | Parameter              | Value   |
|----|------------------------|---------|
| 1  | Solvent                | CDCI3   |
| 2  | Temperature            | 298.2   |
| 3  | Pulse Sequence         | zg30    |
| 4  | Experiment             | 1D      |
| 5  | Number of Scans        | 16      |
| 6  | Receiver Gain          | 181.0   |
| 7  | Relaxation Delay       | 2.00000 |
| 8  | Pulse Width            | 10.0000 |
| 9  | Spectrometer Frequency | 300.13  |
| 10 | Spectral Width         | 6188.1  |
| 11 | Lowest Frequency       | -1246.1 |
| 12 | Nucleus                | 1H      |
| 13 | Acquired Size          | 32768   |
| 14 | Spectral Size          | 65536   |

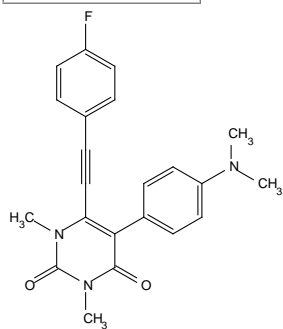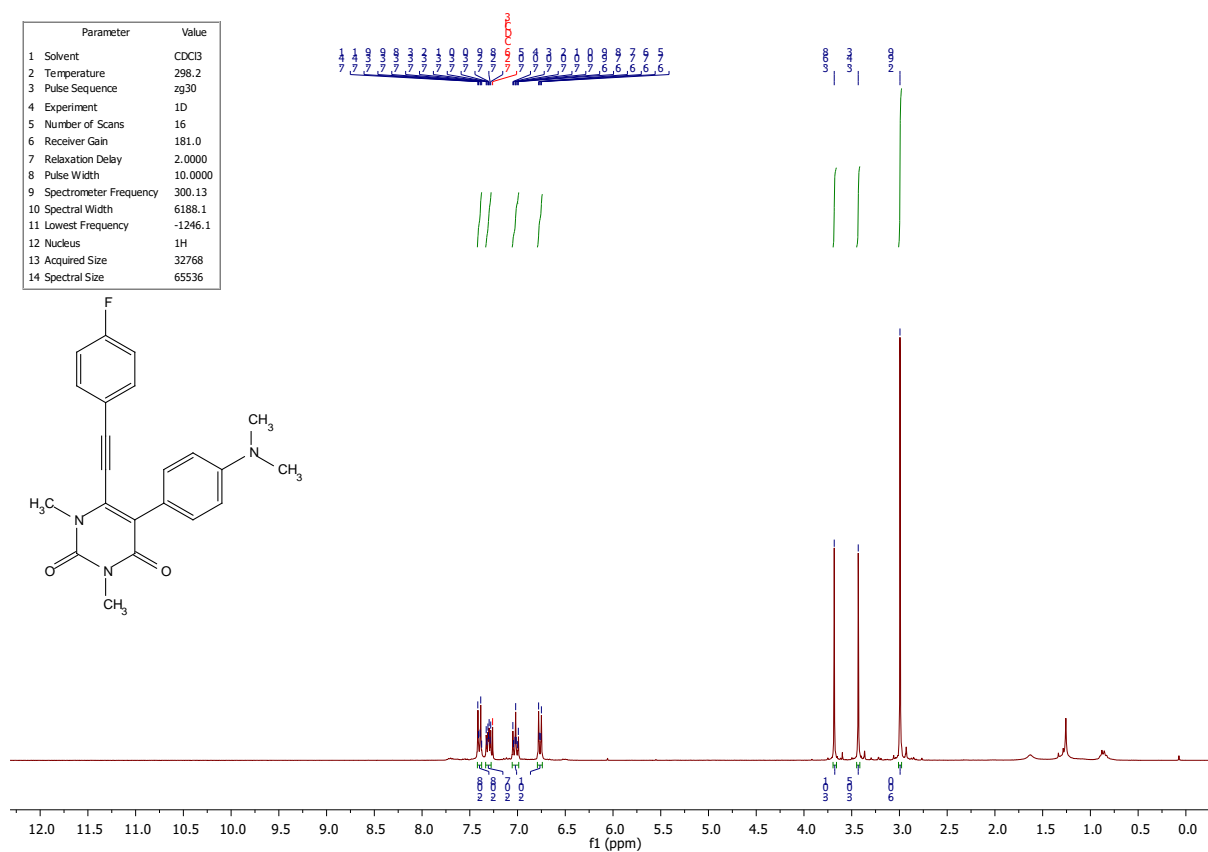

|    | Parameter              | Value    |
|----|------------------------|----------|
| 1  | Solvent                | CDC13    |
| 2  | Temperature            | 298.2    |
| 3  | Pulse Sequence         | zgpg30   |
| 4  | Experiment             | 1D       |
| 5  | Number of Scans        | 64       |
| 6  | Receiver Gain          | 2050.0   |
| 7  | Relaxation Delay       | 1.0000   |
| 8  | Pulse Width            | 10.0000  |
| 9  | Spectrometer Frequency | 282.38   |
| 10 | Spectral Width         | 66964.3  |
| 11 | Lowest Frequency       | -61722.4 |
| 12 | Nucleus                | 19F      |
| 13 | Acquired Size          | 65536    |
| 14 | Spectral Size          | 131072   |

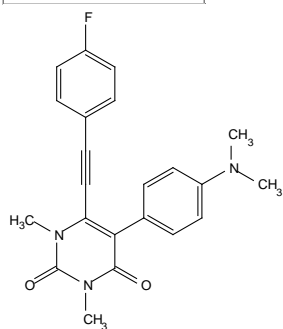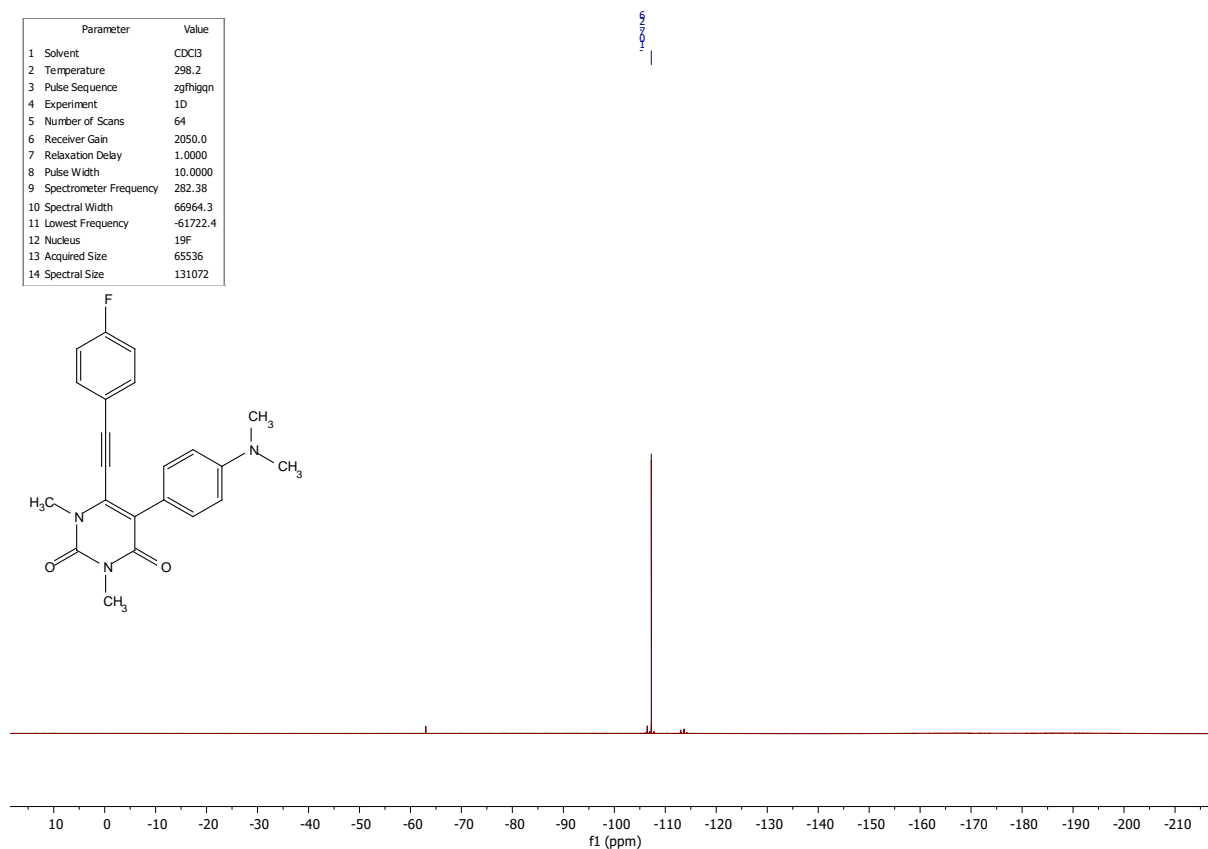

| Parameter                | Value   |
|--------------------------|---------|
| 1 Solvent                | CDCl3   |
| 2 Temperature            | 298.2   |
| 3 Pulse Sequence         | zgpg30  |
| 4 Experiment             | 1D      |
| 5 Number of Scans        | 1024    |
| 6 Receiver Gain          | 2050.0  |
| 7 Relaxation Delay       | 2.0000  |
| 8 Pulse Width            | 10.0000 |
| 9 Spectrometer Frequency | 75.48   |
| 10 Spectral Width        | 18028.8 |
| 11 Lowest Frequency      | -1468.1 |
| 12 Nucleus               | 13C     |
| 13 Acquired Size         | 32768   |
| 14 Spectral Size         | 65536   |

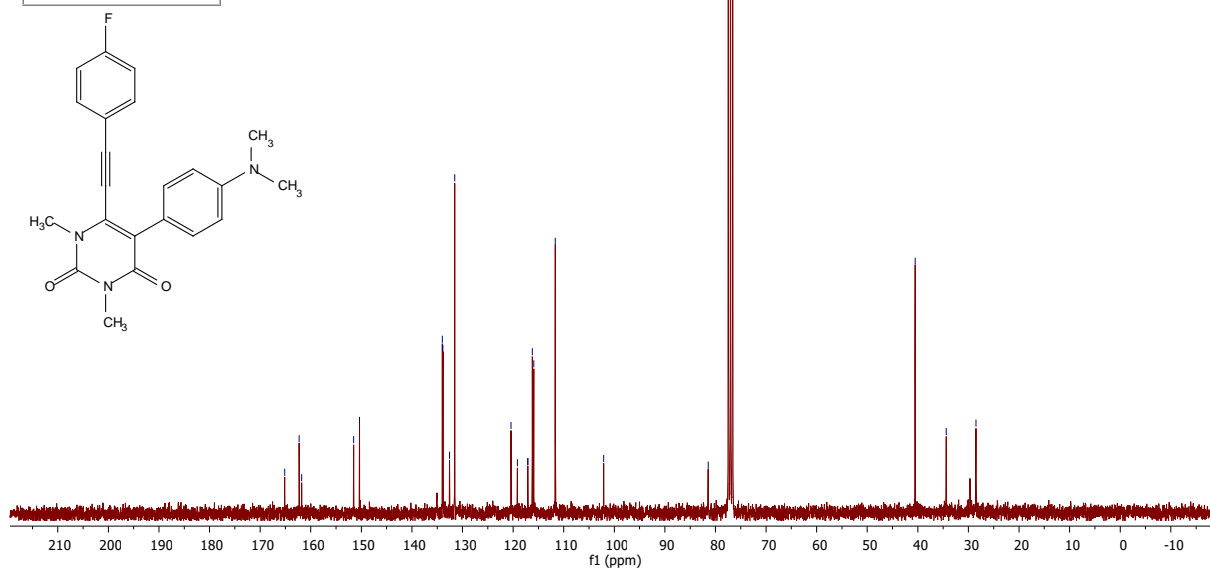



# 1,3-Dimethyl-6-[2-(4-trifluoromethylphenyl)ethynyl]-5-(4-dimethylaminophenyl)uracil (5q)

| Parameter                | Value             |
|--------------------------|-------------------|
| 1 Solvent                | CDCl <sub>3</sub> |
| 2 Temperature            | 298.1             |
| 3 Pulse Sequence         | zg30              |
| 4 Experiment             | 1D                |
| 5 Number of Scans        | 16                |
| 6 Receiver Gain          | 101.0             |
| 7 Relaxation Delay       | 1.0000            |
| 8 Pulse Width            | 8.0000            |
| 9 Spectrometer Frequency | 500.13            |
| 10 Spectral Width        | 10000.0           |
| 11 Lowest Frequency      | -1925.2           |
| 12 Nucleus               | <sup>1</sup> H    |
| 13 Acquired Size         | 32768             |
| 14 Spectral Size         | 65536             |

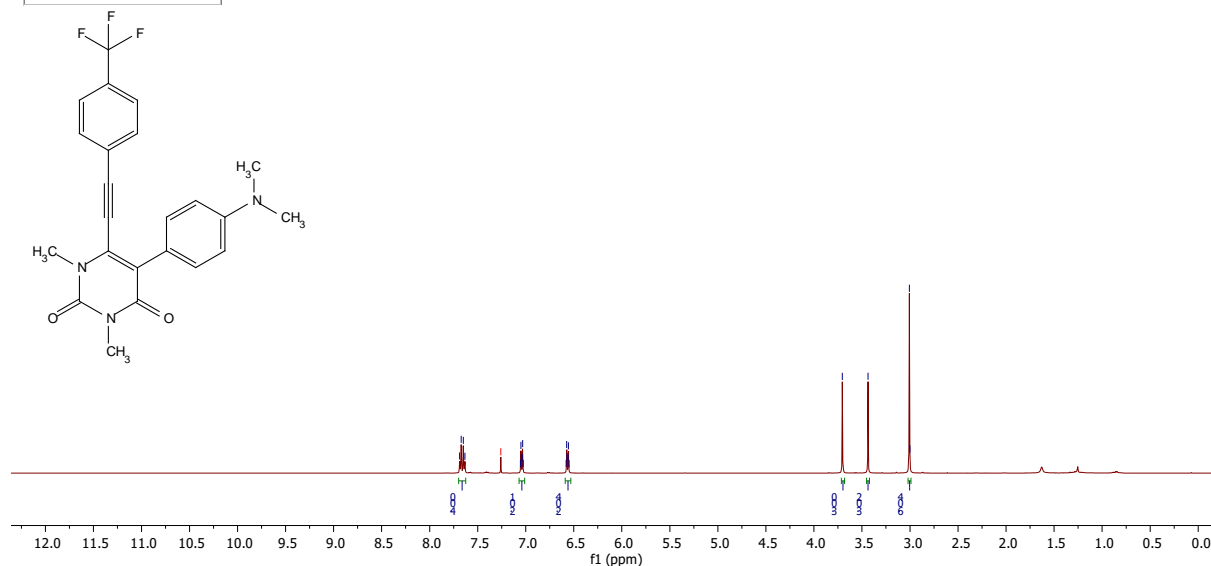

| Parameter                | Value             |
|--------------------------|-------------------|
| 1 Solvent                | CDCl <sub>3</sub> |
| 2 Temperature            | 298.2             |
| 3 Pulse Sequence         | zgpg              |
| 4 Experiment             | 1D                |
| 5 Number of Scans        | 16                |
| 6 Receiver Gain          | 101.0             |
| 7 Relaxation Delay       | 1.0000            |
| 8 Pulse Width            | 12.0000           |
| 9 Spectrometer Frequency | 470.55            |
| 10 Spectral Width        | 113636.4          |
| 11 Lowest Frequency      | -103877.4         |
| 12 Nucleus               | <sup>19</sup> F   |
| 13 Acquired Size         | 65536             |
| 14 Spectral Size         | 131072            |

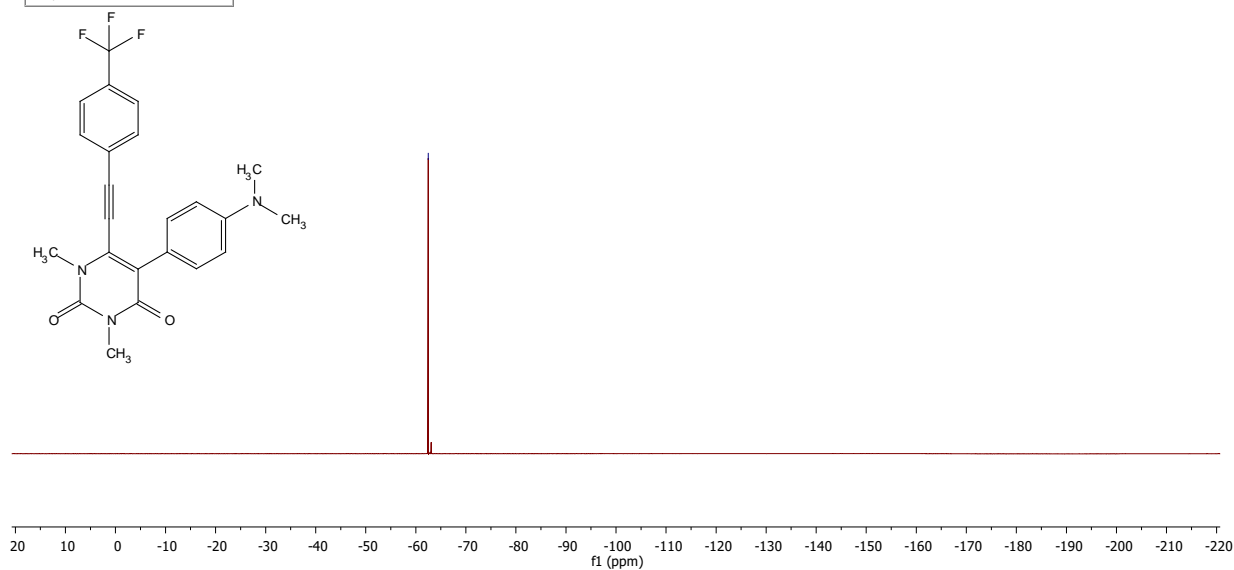



**6-((4-(Dimethylamino)phenyl)ethynyl)-1,3-dimethyl-5-(thiophen-3-yl)pyrimidine-2,4(1*H*,3*H*)-dione (5r)**

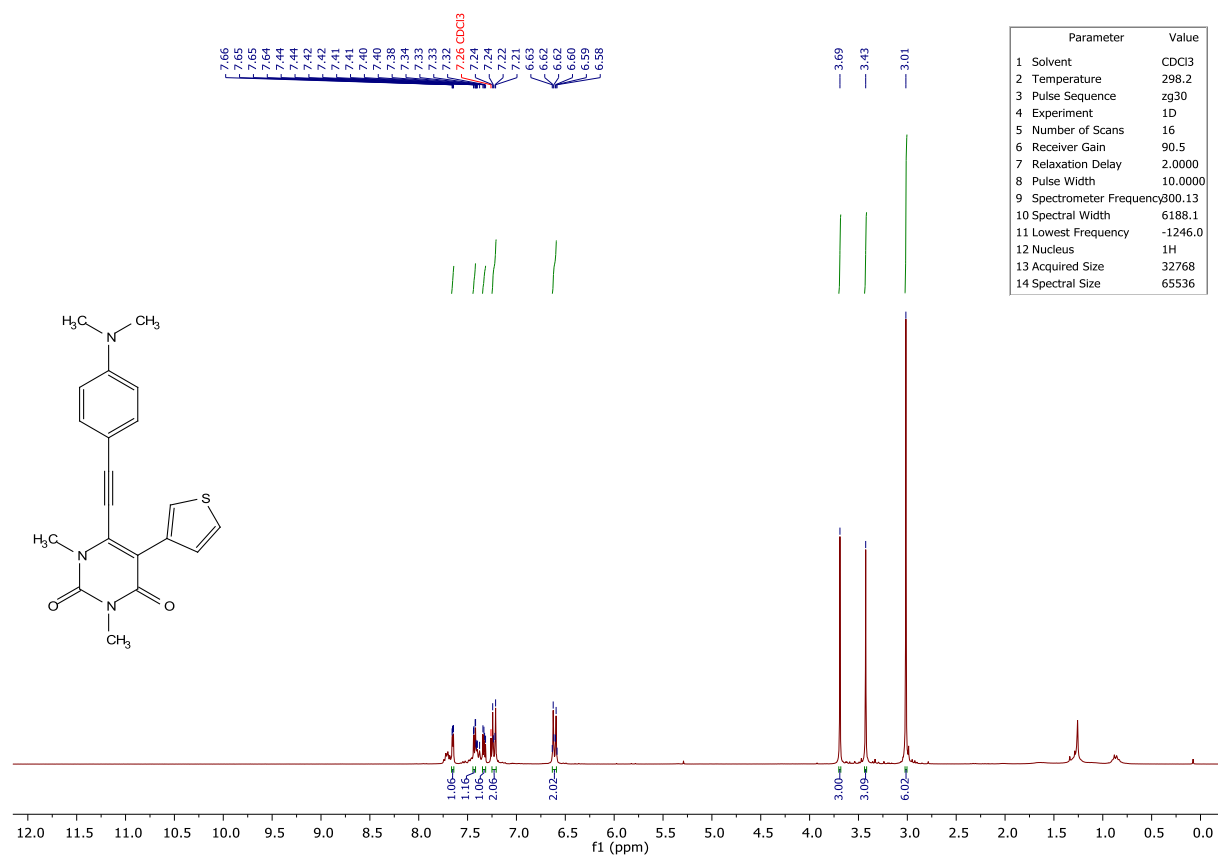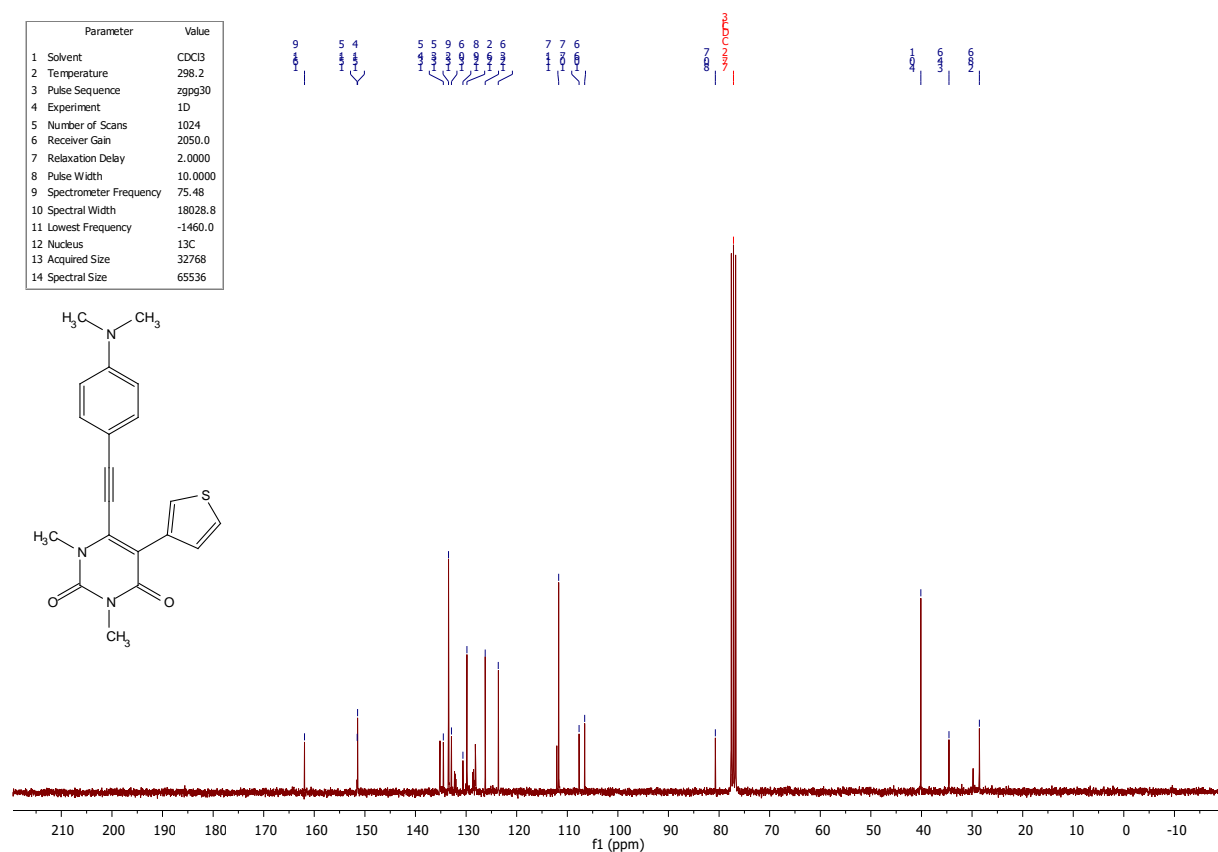

| Parameter                | Value             |
|--------------------------|-------------------|
| 1 Solvent                | CDCl <sub>3</sub> |
| 2 Temperature            | 298.2             |
| 3 Pulse Sequence         | zg30              |
| 4 Experiment             | 1D                |
| 5 Number of Scans        | 16                |
| 6 Receiver Gain          | 287.0             |
| 7 Relaxation Delay       | 2.0000            |
| 8 Pulse Width            | 10.0000           |
| 9 Spectrometer Frequency | 300.13            |
| 10 Spectral Width        | 6188.1            |
| 11 Lowest Frequency      | -1245.9           |
| 12 Nucleus               | <sup>1</sup> H    |
| 13 Acquired Size         | 32768             |
| 14 Spectral Size         | 65536             |

Chemical structure of 1-methyl-2-(4-(dimethylamino)-2-((thiophen-2-ylethynyl)vinyl)pyrimidin-5(1H)-ylidene)-1H-imidazole:

CN1C=NC2=C(N1C)C(=O)C(C#CC3=CC=CS3)=C2C4=CC=CC=C4N(C)C

<sup>1</sup>H NMR spectrum (CDCl<sub>3</sub>) showing peaks at 7.45, 7.46, 7.48, 7.44, 7.42, 7.41, 7.39, 7.38, 7.35, 7.33, 7.29, 7.28, 7.27, 7.26 (CDCl<sub>3</sub>), 7.02, 6.98, 6.77, 6.75, 3.67, 3.43, and 2.99 ppm. Integration values are 3.04, 1.08, 1.06, 2.05, 3.00, 3.08, and 6.02.

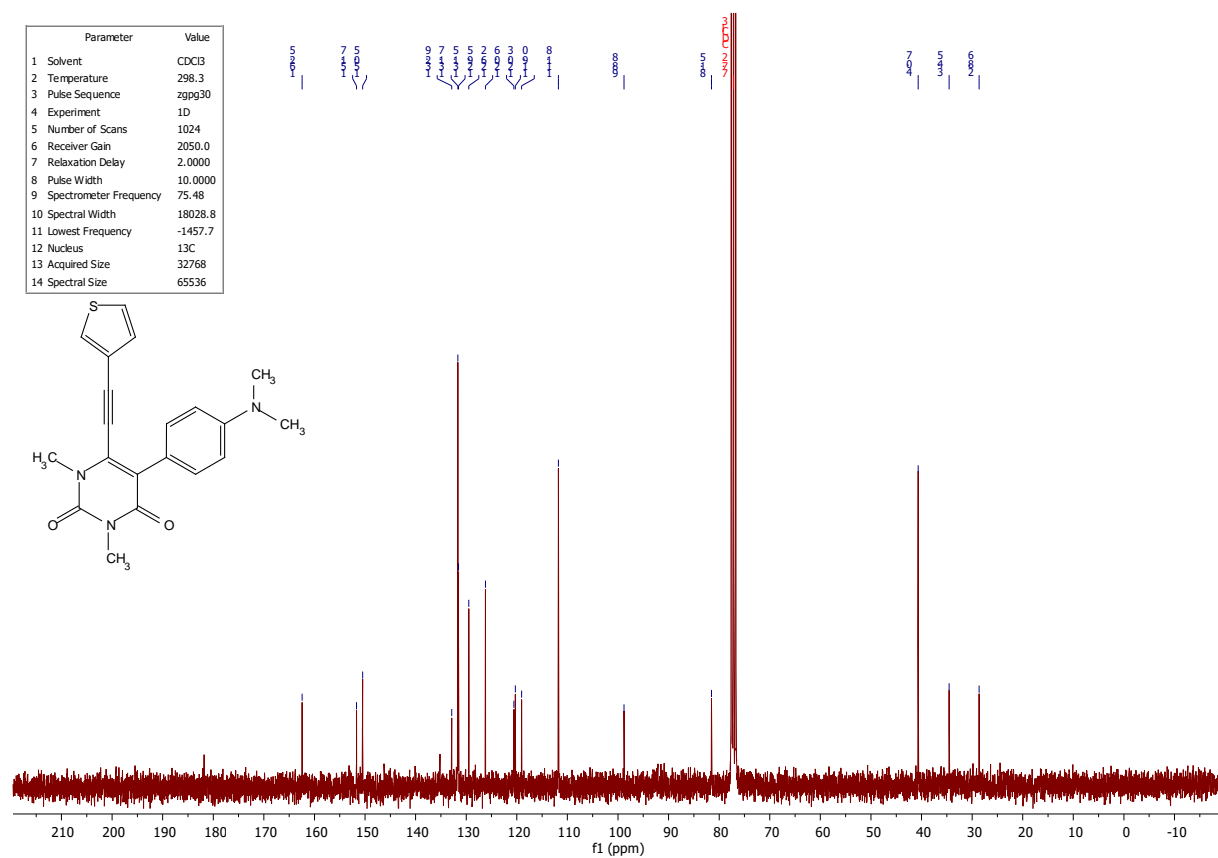

# 5-(Furan-3-yl)-1,3-dimethyl-6-(*p*-tolylethynyl)pyrimidine-2,4(1*H*,3*H*)-dione (5t)

| Parameter                | Value             |
|--------------------------|-------------------|
| 1 Solvent                | CDCl <sub>3</sub> |
| 2 Temperature            | 298.2             |
| 3 Pulse Sequence         | zg30              |
| 4 Experiment             | 1D                |
| 5 Number of Scans        | 16                |
| 6 Receiver Gain          | 203.0             |
| 7 Relaxation Delay       | 2.0000            |
| 8 Pulse Width            | 10.0000           |
| 9 Spectrometer Frequency | 800.13            |
| 10 Spectral Width        | 6188.1            |
| 11 Lowest Frequency      | -1246.4           |
| 12 Nucleus               | <sup>1</sup> H    |
| 13 Acquired Size         | 32768             |
| 14 Spectral Size         | 65536             |

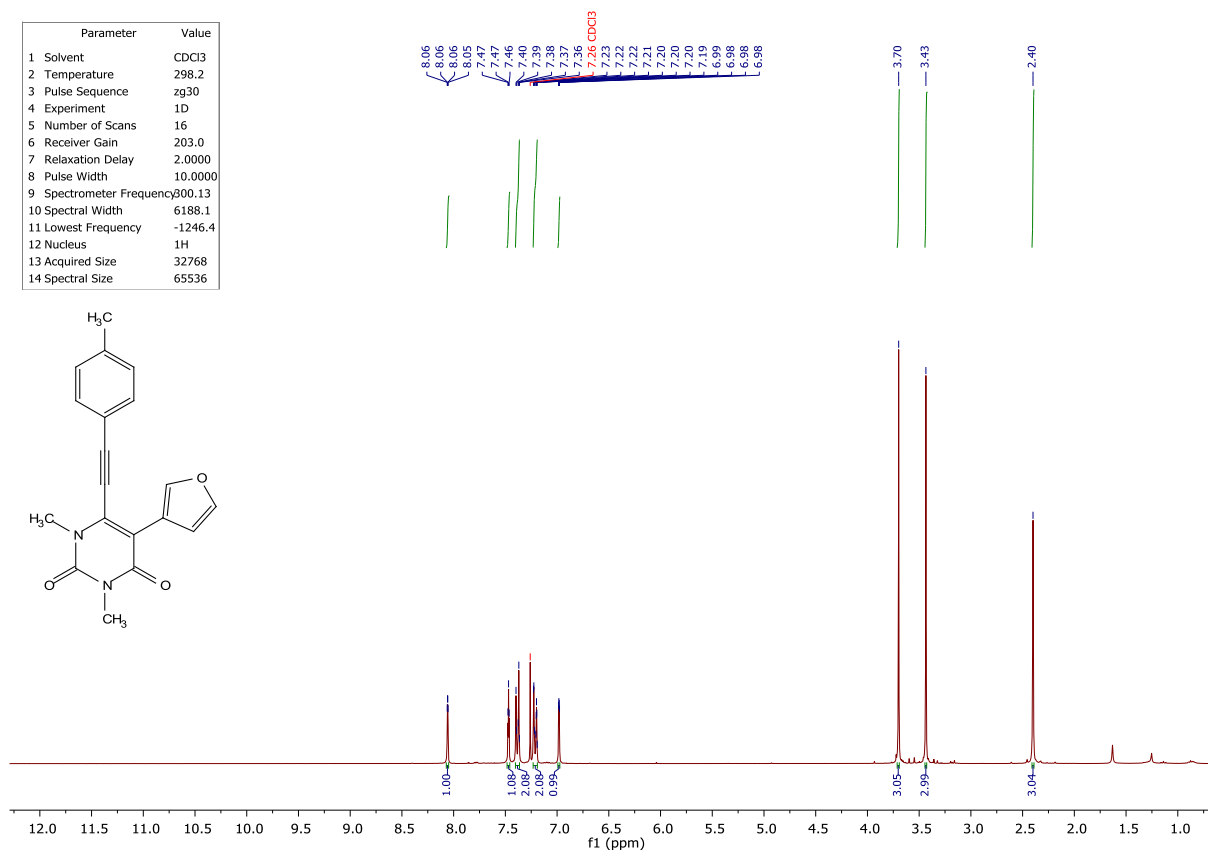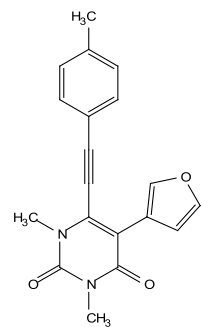

| Parameter                | Value             |
|--------------------------|-------------------|
| 1 Solvent                | CDCl <sub>3</sub> |
| 2 Temperature            | 298.4             |
| 3 Pulse Sequence         | zgpg30            |
| 4 Experiment             | 1D                |
| 5 Number of Scans        | 1024              |
| 6 Receiver Gain          | 2050.0            |
| 7 Relaxation Delay       | 2.0000            |
| 8 Pulse Width            | 10.0000           |
| 9 Spectrometer Frequency | 75.48             |
| 10 Spectral Width        | 18028.8           |
| 11 Lowest Frequency      | -1458.5           |
| 12 Nucleus               | <sup>13</sup> C   |
| 13 Acquired Size         | 32768             |
| 14 Spectral Size         | 65536             |

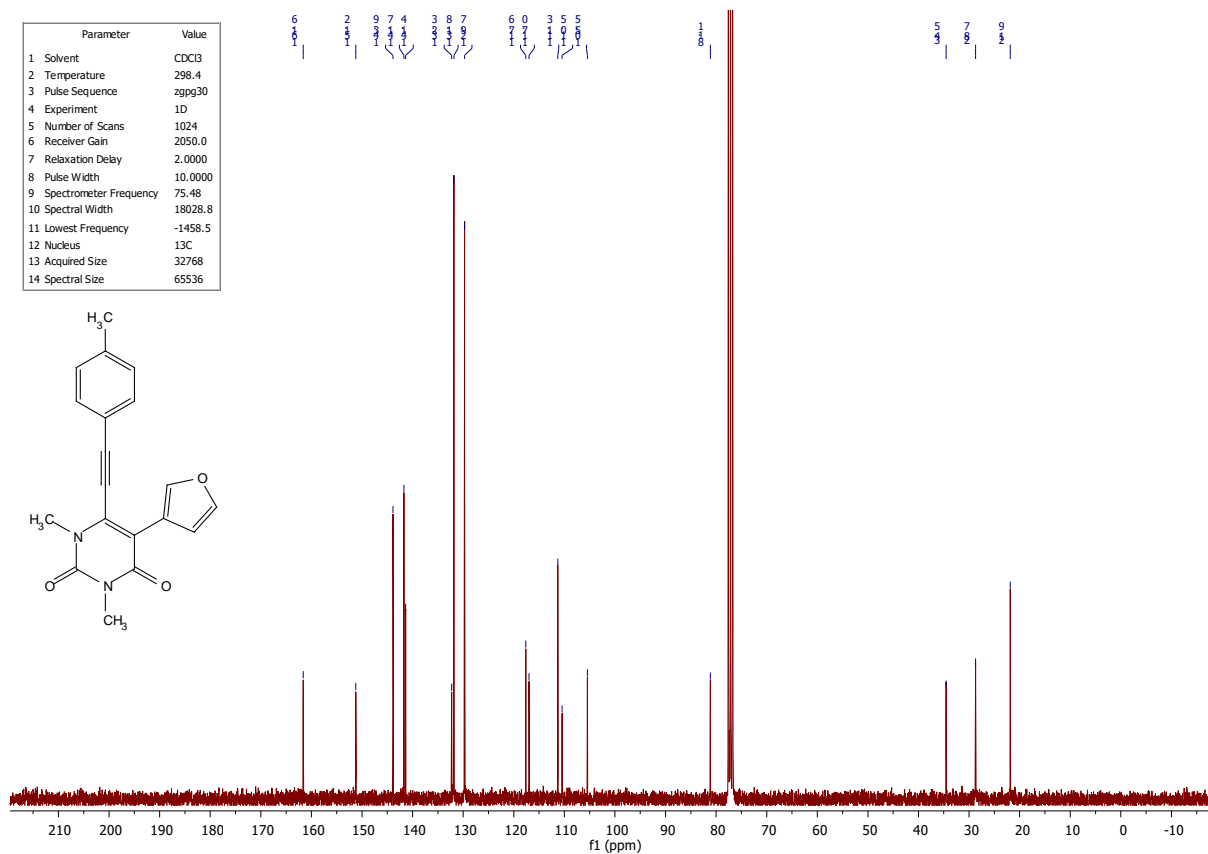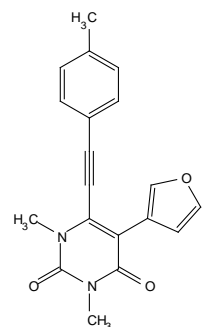

Supplement: Additional file 1 [file 1860-5397-20-80-S1.pdf]
